# Supplementary material for: How Often Are Antibiotic-Resistant Bacteria Said to “Evolve” in the News?
Source: PLoS One. 2016 Mar 2;11(3):e0150396. doi: 10.1371/journal.pone.0150396 (PMC4775048; doi:10.1371/journal.pone.0150396)
Supplement: S2 Table — Approximately one-third of all the articles were randomly chosen for qualitative analysis. The context of each substitute word in the various articles is given, arranged by (a) article and by (b) word. “Evolve” phrases are in green, “mutate” phrases are in red, “develop” phrases are in purple, “emerge” phrases are in blue, “rise” words are in orange, and “increase” words are in brown. (XLSX) [file pone.0150396.s004.xlsx]

## Sheet: a
	S2a Table. Random Articles and Their Phrases. How often do bacteria "evolve" resistance to antibiotics in the news? Nina Singh, Matthew Sit, Deanna Chung, Ana A. Lopez, Ranil Weerackoon, and Pamela J. Yeh, 2016
Line Number	Article Title	URL	Phrase with Word
1	Abbott to seek U.S. OK to market new antibiotic	http://infoweb.newsbank.com/resources/doc/nb/news/0EB36E63160BE109?p=AWNB	The drug is intended to treat a wide array of respiratory diseases, including several that have developed resistance to existing medications
2	Abuse Dilutes Antibiotics' Power - Weakened Efficacy Of Wonder Drugs Becoming Common	http://infoweb.newsbank.com/resources/doc/nb/news/0EB4213C124E875B?p=AWNB	Microbes possess remarkable genetic versatility that enables them to develop new pathenogenic vigor . . . and to develop antibiotic resistance
3	Abuse Dilutes Antibiotics' Power - Weakened Efficacy Of Wonder Drugs Becoming Common	http://infoweb.newsbank.com/resources/doc/nb/news/0EB4213C124E875B?p=AWNB	vancomycin would cause the bacteria to develop resistance
4	Abuse Dilutes Antibiotics' Power - Weakened Efficacy Of Wonder Drugs Becoming Common	http://infoweb.newsbank.com/resources/doc/nb/news/0EB4213C124E875B?p=AWNB	Multiple-drug resistance occurs when bacteria destroy or inactivate an antibiotic or a class of antibiotics, either by mutation or by blocking the effects of the drug
5	Miracle Drugs - Abuse Weakens Power to Cure	http://infoweb.newsbank.com/resources/doc/nb/news/0EB4221385CA4E1B?p=AWNB	Multiple drug resistance - when it takes more than one attempt at different antibiotics to cure an infection - is also on the rise.
6	Miracle Drugs - Abuse Weakens Power to Cure	http://infoweb.newsbank.com/resources/doc/nb/news/0EB4221385CA4E1B?p=AWNB	drug may not be working because the bacteria have developed a resistance against the antibiotic
7	Germs Are Fighting Back - Antibiotics Are Losing Ground To Some	http://infoweb.newsbank.com/resources/doc/nb/news/0EB42240D92015D3?p=AWNB	The bacteria can evolve about as quickly as we can make new antibiotics
8	Germs Are Fighting Back - Antibiotics Are Losing Ground To Some	http://infoweb.newsbank.com/resources/doc/nb/news/0EB42240D92015D3?p=AWNB	Some critics charge that even as the rate of disease caused by antibiotic-resistant bacteria has increased in recent years, the search for new drugs to combat the problem has lost its momentum
9	Antibiotics losing war vs. germs in children	http://infoweb.newsbank.com/resources/doc/nb/news/0EB4237FF74C1BB8?p=AWNB	Resistance to antibiotics is a growing problem, caused by the devilish ability of microbes to evolve new defenses against drugs
10	Antibiotics losing war vs. germs in children	http://infoweb.newsbank.com/resources/doc/nb/news/0EB4237FF74C1BB8?p=AWNB	the number of children infected by methicillin-resistant germs outside the hospital increased
11	Antibiotics losing war vs. germs in children	http://infoweb.newsbank.com/resources/doc/nb/news/0EB4237FF74C1BB8?p=AWNB	Researchers say overprescribing antibiotics is in part to blame for the emergence of drug-resistant germs
12	Antibiotics losing war vs. germs in children	http://infoweb.newsbank.com/resources/doc/nb/news/0EB4237FF74C1BB8?p=AWNB	Over time, microbes can develop resistance to the drug
13	Antibiotics losing war vs. germs in children	http://infoweb.newsbank.com/resources/doc/nb/news/0EB4237FF74C1BB8?p=AWNB	For example, a chance mutation can give a microbe resistance.
14	Preventive medicine keeps cattle healthy and strong	http://infoweb.newsbank.com/resources/doc/nb/news/12F7BA5B99424730?p=AWNB	none
15	No benefits for most, and side-effects are possible Study: Too many asthmatic kids being given antibiotics	http://infoweb.newsbank.com/resources/doc/nb/news/137927BA04A83708?p=AWNB	none
16	FEARING DRUG RESISTANCE	http://infoweb.newsbank.com/resources/doc/nb/news/0F80844AB3765A20?p=AWNB	Within a few years of penicillin going on the market in 1940, microbes began evolving into resistant forms through random genetic mutation.
17	FEARING DRUG RESISTANCE	http://infoweb.newsbank.com/resources/doc/nb/news/0F80844AB3765A20?p=AWNB	The emergence of bacteria strains that cannot be killed by the current arsenal of antibiotics could become a public health threat worse than AIDS, experts warn.
18	FEARING DRUG RESISTANCE	http://infoweb.newsbank.com/resources/doc/nb/news/0F80844AB3765A20?p=AWNB	about 85 percent of all types of bacteria responsible for U.S. hospital-acquired infections have developed resistance
19	FEARING DRUG RESISTANCE	http://infoweb.newsbank.com/resources/doc/nb/news/0F80844AB3765A20?p=AWNB	Nationwide, CDC found a 20-fold increase from January 1989 through March 1993 in the reported percentage of nosocomial infections by enterococcus bacteria resistant to treatment by vancomycin
20	ANTIBIOTICS LOSING POWERS NEW BACTERIA STRAIN IS RESISTANT	http://infoweb.newsbank.com/resources/doc/nb/news/0F80844BA8121472?p=AWNB	Common, easily spread bacteria increasingly are developing strains not treatable by existing antibiotic
21	COMMON ILLS OUTRACING CURES, SCIENCE WARNS	http://infoweb.newsbank.com/resources/doc/nb/news/0F8084834815823D?p=AWNB	Americans should be...more concerned about the increasing number of ordinary bacteria strains, microbiologists warn, because it's the everyday ones that have evolved to shrug off every type of medicine doctors can throw at them
22	COMMON ILLS OUTRACING CURES, SCIENCE WARNS	http://infoweb.newsbank.com/resources/doc/nb/news/0F8084834815823D?p=AWNB	Microbes have been evolving and mutating to survive antibiotic attacks
23	PENICILLIN FAILING IN WAR ON MICROBES	http://infoweb.newsbank.com/resources/doc/nb/news/0F80851B7220BDCC?p=AWNB	Over the last decade, medical scientists have grown increasingly concerned about the emergence of antibiotic resistance as seemingly vanquished microbes have bounced back
24	ANTIBIOTICS LOSE POWER AGAINST ACNE	http://infoweb.newsbank.com/resources/doc/nb/news/0F808CC8897D29F5?p=AWNB	Resistance is thought to have developed because patients don't finish their prescription
25	DEADLY STAPH GERM BECOMING RESISTANT TO KNOWN ANTIBIOTICS	http://infoweb.newsbank.com/resources/doc/nb/news/0F80C6A963E92E4A?p=AWNB	none
26	PROTEIN MAY BECOME WEAPON AGAINST STAPH	http://infoweb.newsbank.com/resources/doc/nb/news/0F80CFD435DB1482?p=AWNB	Many strains of staph already are untreatable with standard drugs, and scientists were shocked to discover last summer that the germ is developing resistance to the antibiotic of last resort, vancomyci
27	PROTEIN MAY BECOME WEAPON AGAINST STAPH	http://infoweb.newsbank.com/resources/doc/nb/news/0F80CFD435DB1482?p=AWNB	And because a RAP vaccine wouldn't kill the actual bacteria, as antibiotics do, it wouldn't spur the bugs to mutate into drug-resistant forms that now threaten to become untreatable
28	ANTIBIOTICS USE ON FARMS WORRIES HEALTH OFFICIALS	http://infoweb.newsbank.com/resources/doc/nb/news/0F80D00EC4DEBBE0?p=AWNB	But scientists say antibiotics on the farm are helping foodborne germs mutate, too, even as the government is under pressure to approve more agricultural drugs
29	BATTLING BACTERIA BACKFIRES OVERRELIANCE ON ANTIBIOTICS IS CREATING STRAINS THAT ARE RESISTANT TOPENICILLIN-CLASS DRUGS, SAYS STUDY	http://infoweb.newsbank.com/resources/doc/nb/news/0F80D01F9F6FD4C9?p=AWNB	Jacobs said that increasing bacterial drug-resistance had resulted in use of such antibiotics as amoxicillin in double doses to remain effective
30	BATTLING BACTERIA BACKFIRES OVERRELIANCE ON ANTIBIOTICS IS CREATING STRAINS THAT ARE RESISTANT TOPENICILLIN-CLASS DRUGS, SAYS STUDY	http://infoweb.newsbank.com/resources/doc/nb/news/0F80D01F9F6FD4C9?p=AWNB	Scientists believe that antibiotics lose their effectiveness as more bacteria are exposed to the drug, then mutate, forming a resistance to the drug
31	IN THE RACE AGAINST DISEASE, THE MICROBES ARE WINNING, AGAIN	http://infoweb.newsbank.com/resources/doc/nb/news/0F80D6ED6C672294?p=AWNB	a full course of treatment is required to help fend off not only recurrent infection but also the development of antibiotic resistance
32	IN THE RACE AGAINST DISEASE, THE MICROBES ARE WINNING, AGAIN	http://infoweb.newsbank.com/resources/doc/nb/news/0F80D6ED6C672294?p=AWNB	If we do not stop the increase in hospital-acquired antibiotic resistance, our cities and towns may be more vulnerable than ever to deadly infection-causing bacteria
33	Antibiotics forum looks at overuse in 2 fields	http://infoweb.newsbank.com/resources/doc/nb/news/0F3DC02C5CA74E39?p=AWNB	The panelists told of physicians bending too easily to pill-seeking patients, a practice that has led to an increase in drug-resistant strains of bacteria.
34	Antibiotics forum looks at overuse in 2 fields	http://infoweb.newsbank.com/resources/doc/nb/news/0F3DC02C5CA74E39?p=AWNB	They said the arsenal of antibiotics is incapable of withstanding the kind of guerrilla warfare that mutating bacteria practice.
35	MRSA – how bad is the threat?	http://infoweb.newsbank.com/resources/doc/nb/news/11CDA461E534B050?p=AWNB	But some say community strains are bound to become resistant to more antibiotics as they evolve
36	CWRU studies deadly bacteria	http://infoweb.newsbank.com/resources/doc/nb/news/125FB313AFD9F830?p=AWNB	none
37	Resistance growing to last gonorrhea treatment option	http://infoweb.newsbank.com/resources/doc/nb/news/140D36C5188F8960?p=AWNB	This is a clear warning sign that the emergence of cefixime resistance is on the horizon
38	Resistance growing to last gonorrhea treatment option	http://infoweb.newsbank.com/resources/doc/nb/news/140D36C5188F8960?p=AWNB	The most prominent MIC increases were in samples taken from the Western United States and from gay and bisexual men, a pattern seen when resistance to fluoroquinolone developed in the mid 2000s
39	Bubonic plague gets the better of antibiotics	http://www.lexisnexis.com/hottopics/lnacademic/?shr=t&sfi=AC00NBGenSrch&csi=138801	none
40	HOSPITAL BUG HITS SIX PATIENTS	http://www.lexisnexis.com/hottopics/lnacademic/?shr=t&sfi=AC00NBGenSrch&csi=138802	none
41	A BUG DRUGS CAN'T KILL;	http://www.lexisnexis.com/hottopics/lnacademic/?shr=t&sfi=AC00NBGenSrch&csi=138803	This gives a worrying indication of how resistance is on the rise in a broad range of pathogens
42	A BUG DRUGS CAN'T KILL;	http://www.lexisnexis.com/hottopics/lnacademic/?shr=t&sfi=AC00NBGenSrch&csi=138804	The bug, which even shrugs off the current 'last resort' family of antibiotics, called car-bapenems, was discovered by a team led by David Livermore, who directs the PHLS unit monitoring the emergence of drug-resistant bacteria.
43	BEWARE THE SUPERBUG;	http://www.lexisnexis.com/hottopics/lnacademic/?shr=t&sfi=AC00NBGenSrch&csi=138805	The superbug, which has developed resistance to no less than seven antibiotics, first appeared in cattle in the late 1980s. It has since spread to poultry, pigs and sheep.
44	BEWARE THE SUPERBUG;	http://www.lexisnexis.com/hottopics/lnacademic/?shr=t&sfi=AC00NBGenSrch&csi=138806	This is a beast capable of mutating.
45	BEWARE THE SUPERBUG;	http://www.lexisnexis.com/hottopics/lnacademic/?shr=t&sfi=AC00NBGenSrch&csi=138807	Different strains could emerge that are more invasive.
46	BEWARE THE SUPERBUG;	http://www.lexisnexis.com/hottopics/lnacademic/?shr=t&sfi=AC00NBGenSrch&csi=138808	He said: 'These drugs are used legitimately for therapeutic purposes in animals, but at the same time they cause increasing resistance.
47	MARCHING ON, SUPERBUG THAT KNoWS No FEAR	http://www.lexisnexis.com/hottopics/lnacademic/?shr=t&sfi=AC00NBGenSrch&csi=138806	If someone is given antibiotics too often, bacteria in the body can evolve into bacteria which are immune to the drug.
48	MARCHING ON, SUPERBUG THAT KNoWS No FEAR	http://www.lexisnexis.com/hottopics/lnacademic/?shr=t&sfi=AC00NBGenSrch&csi=138808	Another mutant, which can also kill, is said to lurk on hospital floors, bedding, furniture, mops, bedpans and toilets.
49	EU bans antibiotics in fear of superbugs; 'THE PUBLIC'S HEALTH IS OUR PRIORITY'	http://www.lexisnexis.com/hottopics/lnacademic/?shr=t&sfi=AC00NBGenSrch&csi=138811	EU FARM Ministers last night agreed a ban on the use of four antibiotics in animal feed amid fears that they are helping the development of new super-bugs which could kill humans.
50	EU bans antibiotics in fear of superbugs; 'THE PUBLIC'S HEALTH IS OUR PRIORITY'	http://www.lexisnexis.com/hottopics/lnacademic/?shr=t&sfi=AC00NBGenSrch&csi=138812	'The danger is that such resistance is increasing, so the ban is necessary on public health grounds.'
51	Power light that could destroy the superbugs	http://www.lexisnexis.com/hottopics/lnacademic/?shr=t&sfi=AC00NBGenSrch&csi=138816	Bacteria such as tuberculosis (TB) and MRSA, a virulent bacterial infection found mainly in hospitals, have developed incredible resistance to conventional antibiotics and can destroy the immune systems of vulnerable patients.
52	Power light that could destroy the superbugs	http://www.lexisnexis.com/hottopics/lnacademic/?shr=t&sfi=AC00NBGenSrch&csi=138817	But what we didn't bargain for was them mutating and becoming immune.'
53	Superbug widow, 65, dies in hospital	http://www.lexisnexis.com/hottopics/lnacademic/?shr=t&sfi=AC00NBGenSrch&csi=138820	The hospital also had to contact the Centres for Disease Control in the U.S. for expert advice. For 30 years the superbug MRSA has been treated successfully with a drug known as vancomycin but the the highly infectious strains which emerged in Glasgow had a resistance to the drug.
54	Superbug is on rampage in hospitals says expert	http://www.lexisnexis.com/hottopics/lnacademic/?shr=t&sfi=AC00NBGenSrch&csi=138822	It is resistant to most antibiotics and new, more virulent strains of the bug are emerging.
55	Hospitals on alert over superbug that defies drugs	http://www.lexisnexis.com/hottopics/lnacademic/?shr=t&sfi=AC00NBGenSrch&csi=138823	The bug described as 'a timebomb waiting to go off' has emerged as fears grow that scientists are falling behind in the race to develop antibiotics which can fight evolving bacteria.
56	Hospitals on alert over superbug that defies drugs	http://www.lexisnexis.com/hottopics/lnacademic/?shr=t&sfi=AC00NBGenSrch&csi=138824	The bacteria mutate and the resistant ones survive.
57	Hospitals on alert over superbug that defies drugs	http://www.lexisnexis.com/hottopics/lnacademic/?shr=t&sfi=AC00NBGenSrch&csi=138825	Cases continue to emerge in London and other Western cities while it is estimated there could be two million carriers in Russia by 2010.
58	Minister calls for antibiotic curb to halt 'superbugs'	http://www.lexisnexis.com/hottopics/lnacademic/?shr=t&sfi=AC00NBGenSrch&csi=138824	none
59	Peers demand superbug action	http://www.lexisnexis.com/hottopics/lnacademic/?shr=t&sfi=AC00NBGenSrch&csi=138836	'Every needless dose of antibiotics increases the evolutionary pressure in favour of resistant strains, hasten-medical help immediately.
60	Peers demand superbug action	http://www.lexisnexis.com/hottopics/lnacademic/?shr=t&sfi=AC00NBGenSrch&csi=138837	Its report says the best way to slow the rise of superbugs is to crack down on inappropriate use of antibiotics, which encourages resistance.
61	Superbugs getting the better of 'wonder drug'	http://www.lexisnexis.com/hottopics/lnacademic/?shr=t&sfi=AC00NBGenSrch&csi=138837	It was initially effective in all five patients but over a period of weeks tests showed the bacteria were beginning to develop a resistance to the drug.
62	Superbug fear as food poisoning hits 5.5m a year	http://www.lexisnexis.com/hottopics/lnacademic/?shr=t&sfi=AC00NBGenSrch&csi=138846	This is because the bug has mutated and developed a resistance to a similar drug, enroflaxin, used in the rearing of chicken and pigs.
63	Hospital superbug death toll triples in a decade	http://www.lexisnexis.com/hottopics/lnacademic/?shr=t&sfi=AC00NBGenSrch&csi=138849	The research from the PHLS published in the British Medical Journal today charts the deadly rise of MRSA infections in England and Wales.
64	Alert over deadly new strain of superbug in Scotland	http://www.lexisnexis.com/hottopics/lnacademic/?shr=t&sfi=AC00NBGenSrch&csi=138852	none
65	RETURN OF THE plaque?; Today, we've forgotten how mankind has been ravaged by disease. But the outbreak of Sars is a chilling reminder of the human race's frailty in the face of Nature...	http://www.lexisnexis.com/hottopics/lnacademic/?shr=t&sfi=AC00NBGenSrch&csi=138854	After all, bacteria pass through many generations every day. For them, the evolutionary timescale is much shortened by comparison with that of elephants or tortoises.
66	RETURN OF THE plaque?; Today, we've forgotten how mankind has been ravaged by disease. But the outbreak of Sars is a chilling reminder of the human race's frailty in the face of Nature...	http://www.lexisnexis.com/hottopics/lnacademic/?shr=t&sfi=AC00NBGenSrch&csi=138855	A look at the history of natural selection, perhaps, should have warned us that the triumph of antibiotics over disease-causing bacteria would not be permanent, and that the bacteria would fight back by mutating.
67	RETURN OF THE plaque?; Today, we've forgotten how mankind has been ravaged by disease. But the outbreak of Sars is a chilling reminder of the human race's frailty in the face of Nature...	http://www.lexisnexis.com/hottopics/lnacademic/?shr=t&sfi=AC00NBGenSrch&csi=138856	Equally, despite alarm about the emergence of a resistant form of tuberculosis, it has to be remembered that the reason that tuberculosis was all but eradicated was not because of the discovery of effective antibiotic treatments, but improved living conditions, less overcrowding, better nutrition, a degree of immunisation and so forth.
68	Antibiotics will be useless in 12 years, warns expert	http://www.lexisnexis.com/hottopics/lnacademic/?shr=t&sfi=AC00NBGenSrch&csi=138858	And he said the worrying rise of MRSA in British hospitals could be a sign of things to come.
69	SUPERBUG APOCALYPSE	http://www.lexisnexis.com/hottopics/lnacademic/?shr=t&sfi=AC00NBGenSrch&csi=138859	Superbugs, potential killers every one, are evolving, not merely by the week but by the day - far faster than the men and women in white coats can keep up with them.
70	SUPERBUG APOCALYPSE	http://www.lexisnexis.com/hottopics/lnacademic/?shr=t&sfi=AC00NBGenSrch&csi=138860	The first signs of this impending disaster are already making themselves felt in our hospitals, where the toughest and most virulent forms of antibiotic resistant superbugs - like MRSA - are emerging.
71	SUPERBUG APOCALYPSE	http://www.lexisnexis.com/hottopics/lnacademic/?shr=t&sfi=AC00NBGenSrch&csi=138861	Well, the crucial first fact to realise is that the more you challenge infectious microbes with one dose of antibiotics after another, the greater the chance of resistance developing.
72	SUPERBUG APOCALYPSE	http://www.lexisnexis.com/hottopics/lnacademic/?shr=t&sfi=AC00NBGenSrch&csi=138862	Turkeys and other forms of poultry are still, in many places, pumped full of antibiotics. This means that they can develop particularly nasty forms of salmonella, mutated superbugs, that can pass into the human food chain.
73	SUPERBUG APOCALYPSE	http://www.lexisnexis.com/hottopics/lnacademic/?shr=t&sfi=AC00NBGenSrch&csi=138863	Then there is the alarming rise in hospitals of the most powerful superbug, MRSA.
74	Hospital superbug spreads to animals	http://www.lexisnexis.com/hottopics/lnacademic/?shr=t&sfi=AC00NBGenSrch&csi=138861	There really is a big question mark over the whole area.' Hospitals are struggling to defeat MRSA - methicillin resistant staphylococcus aureus - because it is has developed a resistance to penicillin.
75	Hospital superbug spreads to animals	http://www.lexisnexis.com/hottopics/lnacademic/?shr=t&sfi=AC00NBGenSrch&csi=138862	Overuse of antibiotics and lack of hygiene have been blamed for MRSA's deadly rise in hospitals.
76	Hospital superbug deaths 'to double as MRSA beats jabs'	http://www.lexisnexis.com/hottopics/lnacademic/?shr=t&sfi=AC00NBGenSrch&csi=138862	'It's only a matter of time before bacteria that cannot be killed by vancomycin develop in some areas.
77	Hospital superbug deaths 'to double as MRSA beats jabs'	http://www.lexisnexis.com/hottopics/lnacademic/?shr=t&sfi=AC00NBGenSrch&csi=138863	' I t's a constant battle against these superbugs. We thought we had it won a few years ago, but they keep mutating.
78	HOW CAN I BEAT THIS 'SUPERBUG' INFECTION?	http://www.lexisnexis.com/hottopics/lnacademic/?shr=t&sfi=AC00NBGenSrch&csi=138865	Bacteria are single-cell organisms which, in their fight for survival, mutate and change their constituent protein so as to become resistant to antibiotics.
79	New lethal 'superbug' in Scottish hospitals	http://www.lexisnexis.com/hottopics/lnacademic/?shr=t&sfi=AC00NBGenSrch&csi=138867	none
80	Superbug II	http://www.lexisnexis.com/hottopics/lnacademic/?shr=t&sfi=AC00NBGenSrch&csi=138870	none
81	TB superbug is spreading, experts warn	http://www.lexisnexis.com/hottopics/lnacademic/?shr=t&sfi=AC00NBGenSrch&csi=138871	After first emerging in 2000, it has infected more than 200 people, according to the annual report of the Health Protection Agency released yesterday.
82	TB superbug is spreading, experts warn	http://www.lexisnexis.com/hottopics/lnacademic/?shr=t&sfi=AC00NBGenSrch&csi=138872	'This increases the likelihood of drug resistance developing, and with treatment lasting six months or more, it is particularly difficult to ensure the course is completed by those in particular at-risk groups such as the homeless and injecting drug users.'
83	TB superbug is spreading, experts warn	http://www.lexisnexis.com/hottopics/lnacademic/?shr=t&sfi=AC00NBGenSrch&csi=138873	They grow, multiply and mutate quicker than we can deal with them.'
84	SUPERBUG RAMPAGE IN SCOTS HOSPITALS	http://www.lexisnexis.com/hottopics/lnacademic/?shr=t&sfi=AC00NBGenSrch&csi=138873	none
85	Our drug will wipe out MRSA, say British scientists	http://www.lexisnexis.com/hottopics/lnacademic/?shr=t&sfi=AC00NBGenSrch&csi=138876	Most antibiotics target a single protein and that is a relatively easy thing for a bug to evolve around and develop resistance.
86	Our drug will wipe out MRSA, say British scientists	http://www.lexisnexis.com/hottopics/lnacademic/?shr=t&sfi=AC00NBGenSrch&csi=138877	Officially-recorded deaths from MRSA number around 7,000 a year, a 24-fold increase on a decade ago.
87	NEW DRUG WILL WIPE OUT MRSA; Medics hail breakthrough in fight against scourge of Irish hospitals	http://www.lexisnexis.com/hottopics/lnacademic/?shr=t&sfi=AC00NBGenSrch&csi=138877	'Most antibiotics target a single protein and that is a relatively easy thing for a bug to evolve around and develop resistance.
88	NEW DRUG WILL WIPE OUT MRSA; Medics hail breakthrough in fight against scourge of Irish hospitals	http://www.lexisnexis.com/hottopics/lnacademic/?shr=t&sfi=AC00NBGenSrch&csi=138878	'We don't have anything like it currently. It sounds particularly promising because it would make it much harder for bacteria to mutate.
89	NEW DRUG WILL WIPE OUT MRSA; Medics hail breakthrough in fight against scourge of Irish hospitals	http://www.lexisnexis.com/hottopics/lnacademic/?shr=t&sfi=AC00NBGenSrch&csi=138879	'In this country, MRSA has not been high on the Government's agenda even though the bug is definitely on the increase.'
90	Call in the coppers to stop MRSA;	http://www.lexisnexis.com/hottopics/lnacademic/?shr=t&sfi=AC00NBGenSrch&csi=138880	Official statistics suggest they kill at least 5,000 people a year. The best known bug is MRSA but in recent years, other deadly bugs have also emerged.
91	Now MRSA is a threat outside our hospitals	http://www.lexisnexis.com/hottopics/lnacademic/?shr=t&sfi=AC00NBGenSrch&csi=138881	Tory MSP Alex Johnstone said the rise in community-acquired MRSA was proof the infection was being passed outside health service buildings.
92	Cream that could give MRSA a taste of its own medicine	http://www.lexisnexis.com/hottopics/lnacademic/?shr=t&sfi=AC00NBGenSrch&csi=138882	He also warned there was no guarantee that bacteria would not develop resistance to the viruses in the same way as they have to antibiotics.
93	Cream that could give MRSA a taste of its own medicine	http://www.lexisnexis.com/hottopics/lnacademic/?shr=t&sfi=AC00NBGenSrch&csi=138883	Hospital superbugs, which are becoming increasingly resistant to antibiotics, kill at least 5,000 patients a year.
94	Doctors are 'wasting' antibiotics on colds	http://www.lexisnexis.com/hottopics/lnacademic/?shr=t&sfi=AC00NBGenSrch&csi=138883	Overuse of antibiotics can also cause harmful bacteria to develop resistance, making it harder to cure them in future.
95	The deadly imports; (1) A new superbug has been linked to chicken from Asia. Experts say it's the tip of a huge problem. So how worried should we be about food from overseas? (2) GOODHEALTH	http://www.lexisnexis.com/hottopics/lnacademic/?shr=t&sfi=AC00NBGenSrch&csi=138884	none
96	Worst superbug yet' is Now rife in Ireland;	http://www.lexisnexis.com/hottopics/lnacademic/?shr=t&sfi=AC00NBGenSrch&csi=138888	none
97	Health fears grow over deadly superbug infecting 32 farms	http://www.lexisnexis.com/hottopics/lnacademic/?shr=t&sfi=AC00NBGenSrch&csi=138889	Dr Georgina Duckworth, who compiled a report for the agency on the emergence of the E coli, concluded: 'The findings show evidence of people carrying these bacteria in their gut.
98	Health fears grow over deadly superbug infecting 32 farms	http://www.lexisnexis.com/hottopics/lnacademic/?shr=t&sfi=AC00NBGenSrch&csi=138890	The 'super E coli' is thought to have developed a high degree of resistance to antibiotics through their use in intensive livestock operations.
99	SUPERBUG IS ON THE LOOSE; GPs on alert as flesh-eating MRSA spreads in community	http://www.lexisnexis.com/hottopics/lnacademic/?shr=t&sfi=AC00NBGenSrch&csi=138890	none
100	Untreatable' TB case at Scots hospital	http://www.lexisnexis.com/hottopics/lnacademic/?shr=t&sfi=AC00NBGenSrch&csi=138894	none
101	Urgent hunt for close contacts of TB patient	http://www.lexisnexis.com/hottopics/lnacademic/?shr=t&sfi=AC00NBGenSrch&csi=138895	Yesterday, Conservative MP Nick Herbert, co-chairman of the parliamentary group on global TB, said the emergence of the latest, drug-resistant form of the disease represented a 'serious challenge'.
102	Urgent hunt for close contacts of TB patient	http://www.lexisnexis.com/hottopics/lnacademic/?shr=t&sfi=AC00NBGenSrch&csi=138896	The drug resistant strain is thought to have developed through a failure by patients to adhere to the six month course of antibiotics used to treat ordinary TB.
103	Pandemic warning over the hospital superbug that resists safe antibiotics	http://www.lexisnexis.com/hottopics/lnacademic/?shr=t&sfi=AC00NBGenSrch&csi=138896	none
104	Wonder gel that spells the end for superbugs	http://www.lexisnexis.com/hottopics/lnacademic/?shr=t&sfi=AC00NBGenSrch&csi=138901	The breakthrough discovery a compound known as XF-73 continued to destroy the deadly superbug long after it would have developed resistance to antibiotics.
105	Could a dab of gel to the Nose beat MRSA?	http://www.lexisnexis.com/hottopics/lnacademic/?shr=t&sfi=AC00NBGenSrch&csi=138902	The superbug did not develop any resistance to the treatment even after being exposed to it 55 times.
106	Antibiotic ‘cold cures’ are fuelling rise of superbugs	http://www.lexisnexis.com/hottopics/lnacademic/?shr=t&sfi=AC00NBGenSrch&csi=138909	Provisional data from the European Antimicrobial Resistance Surveillance System 2008 shows Ireland had an 18.3 per cent increase in the resistance of the bug strep.
107	Antibiotic ‘cold cures’ are fuelling rise of superbugs	http://www.lexisnexis.com/hottopics/lnacademic/?shr=t&sfi=AC00NBGenSrch&csi=138910	The sharp rise in deadly new strains of superbugs such as MRSA is being linked to the inappropriate use of antibiotics, the Irish Pharmacy Union (IPU) warned yesterday.
108	WRITING ON WALL FOR SUPERBUGS	http://www.lexisnexis.com/hottopics/lnacademic/?shr=t&sfi=AC00NBGenSrch&csi=138912	Drug-resistant bacteria have emerged as a major public health problem over the past ten years.
109	WE'VE ONLY GOT OURSELVES TO BLAME FOR THE INDESTRUCTIBLE INDIAN SUPERBUG	http://www.lexisnexis.com/hottopics/lnacademic/?shr=t&sfi=AC00NBGenSrch&csi=138915	While it can take centuries or millennia for an animal species to visibly evolve new traits, with bacteria new drug-resistant strains can emerge in months or even days, and spread like wildfire.
110	WE'VE ONLY GOT OURSELVES TO BLAME FOR THE INDESTRUCTIBLE INDIAN SUPERBUG	http://www.lexisnexis.com/hottopics/lnacademic/?shr=t&sfi=AC00NBGenSrch&csi=138916	This week, it is reported that a new strain of drug-resistant bacteria has emerged on the Indian subcontinent.
111	WE'VE ONLY GOT OURSELVES TO BLAME FOR THE INDESTRUCTIBLE INDIAN SUPERBUG	http://www.lexisnexis.com/hottopics/lnacademic/?shr=t&sfi=AC00NBGenSrch&csi=138917	And amid this promiscuity the bacteria's genes get spliced and transferred, and mutations are acquired and passed on.
112	HOW TOOTHPASTE IS SPEEDING UP THE SPREAD OF SUPERBUGS	http://www.lexisnexis.com/hottopics/lnacademic/?shr=t&sfi=AC00NBGenSrch&csi=138917	Some strains of the hospital superbug MRSA have also developed low levels of triclosan resistance.
113	HOW TOOTHPASTE IS SPEEDING UP THE SPREAD OF SUPERBUGS	http://www.lexisnexis.com/hottopics/lnacademic/?shr=t&sfi=AC00NBGenSrch&csi=138918	Laboratory studies have shown triclosan can trigger gene mutations in bacteria, enabling them to protect themselves against it.
114	HOW TOOTHPASTE IS SPEEDING UP THE SPREAD OF SUPERBUGS	http://www.lexisnexis.com/hottopics/lnacademic/?shr=t&sfi=AC00NBGenSrch&csi=138919	Studies have shown there are already bacterial mutations of E coli, salmonella and listeria, which have some degree of resistance to triclosan.
115	WE'VE HAD SUPERBUGS, BUT NoW THE WORLD HEALTH ORGANISATION IS WARNING OF STRAINS SO RESILIENT THAT No DRUGS WILL KILL THEM. SO HOW DO WE SURVIVE THE... ATTACK OF THE HYPERBUGS	http://www.lexisnexis.com/hottopics/lnacademic/?shr=t&sfi=AC00NBGenSrch&csi=138922	Superbugs have evolved in hospitals where there are lots of antibiotics.
116	WE'VE HAD SUPERBUGS, BUT NoW THE WORLD HEALTH ORGANISATION IS WARNING OF STRAINS SO RESILIENT THAT No DRUGS WILL KILL THEM. SO HOW DO WE SURVIVE THE... ATTACK OF THE HYPERBUGS	http://www.lexisnexis.com/hottopics/lnacademic/?shr=t&sfi=AC00NBGenSrch&csi=138923	Mutations (changes) in the genetic code of all cells Z ours and the bacteria Z happen all the time. If a mutation occurs that prevents a bacterium from being killed by an antibiotic, this bacterium will live while the others around it are killed when the antibiotic treatment is given.
117	WE'VE HAD SUPERBUGS, BUT NoW THE WORLD HEALTH ORGANISATION IS WARNING OF STRAINS SO RESILIENT THAT No DRUGS WILL KILL THEM. SO HOW DO WE SURVIVE THE... ATTACK OF THE HYPERBUGS	http://www.lexisnexis.com/hottopics/lnacademic/?shr=t&sfi=AC00NBGenSrch&csi=138924	Infections have increased ten-fold in the past six years.
118	THE CYSTITIS SUPERBUG	http://www.lexisnexis.com/hottopics/lnacademic/?shr=t&sfi=AC00NBGenSrch&csi=138926	And recently there were reports that a strain of the bacteria that causes gonorrhoea had emerged in Japan that was resistant to all known antibiotics.
119	IF WE DON'T STOP HANDING OUT ANTIBIOTICS LIKE SWEETS, EVEN A CUT FINGER COULD SOON BE FATAL	http://www.lexisnexis.com/hottopics/lnacademic/?shr=t&sfi=AC00NBGenSrch&csi=138928	They are potentially lethal bacteria that resist our best antibiotic drugs, and these new super-infections are emerging because we have created them through our own hypochondria and ignorance.
120	IF WE DON'T STOP HANDING OUT ANTIBIOTICS LIKE SWEETS, EVEN A CUT FINGER COULD SOON BE FATAL	http://www.lexisnexis.com/hottopics/lnacademic/?shr=t&sfi=AC00NBGenSrch&csi=138929	Those survivors, which have been put under stress but not killed, may recover in a mutated form that the drugs can no longer attack.'
121	IF WE DON'T STOP HANDING OUT ANTIBIOTICS LIKE SWEETS, EVEN A CUT FINGER COULD SOON BE FATAL	http://www.lexisnexis.com/hottopics/lnacademic/?shr=t&sfi=AC00NBGenSrch&csi=138930	With gonorrhoea, we are seeing a large increase in the incidence of resistant strains.
122	HOW DRUGS PUMPED INTO SUPERMARKET CHICKENS POSE A TERRIFYING THREAT TO OUR HEALTH	http://www.lexisnexis.com/hottopics/lnacademic/?shr=t&sfi=AC00NBGenSrch&csi=138931	The question is, will the world's leaders wake up in time to this emerging epidemic of drug-resistant infections, or will they allow our hypochondria to propel us into a world where our best drugs no longer work and where the most apparently innocuous infections can turn into a death sentence?
123	GOLDEN AGE OF ANTIBIOTICS IS ENDING, SAYS TOP PROFESSOR	http://www.lexisnexis.com/hottopics/lnacademic/?shr=t&sfi=AC00NBGenSrch&csi=138932	He said complacency set in during the 1970s and 1980s when antibiotics could have been used more wisely to stave off resistance to the drugs developing.
124	DOCTORS TOLD TO STOP DOLING OUT ANTIBIOTICS	http://www.lexisnexis.com/hottopics/lnacademic/?shr=t&sfi=AC00NBGenSrch&csi=138933	none
125	DESIGNER' ANTIBIOTICS TO HALT RISE OF SUPERBUGS	http://www.lexisnexis.com/hottopics/lnacademic/?shr=t&sfi=AC00NBGenSrch&csi=138934	Resistance has also been shown to be increasing in gram-negative' bacteria, which are linked to a number of infections, including urinary tract ones, particularly in hospitalised patients.
126	DESIGNER' ANTIBIOTICS TO HALT RISE OF SUPERBUGS	http://www.lexisnexis.com/hottopics/lnacademic/?shr=t&sfi=AC00NBGenSrch&csi=138935	Now, a new wave of drugs is being developed that target a single type of bacteria, in the hope they will slow the rise of resistance.
127	The never-ending bacteria battle Scientists fight back as organisms outwit antibiotics	http://infoweb.newsbank.com/resources/doc/nb/news/0ED5629E06CF88C1?p=AWNB	Scientists attribute the development of antibiotic-resistant bacteria mainly to misuse of the medicines
128	The never-ending bacteria battle Scientists fight back as organisms outwit antibiotics	http://infoweb.newsbank.com/resources/doc/nb/news/0ED5629E06CF88C1?p=AWNB	In New York City, for example, public health officials are concerned about an increase in antibiotic-resistant tuberculosis
129	Arkansas infectious-disease deaths rise - State follows nation in recording increase over the last decade	http://infoweb.newsbank.com/resources/doc/nb/news/0ED3D6754EB6208C?p=AWNB	National experts attribute the increase in deaths from disease to such things as increased international travel, longer life spans and the emergence of bacteria that have developed a tolerance to antibiotics
130	Arkansas infectious-disease deaths rise - State follows nation in recording increase over the last decade	http://infoweb.newsbank.com/resources/doc/nb/news/0ED3D6754EB6208C?p=AWNB	Strains of streptococcus bacteria that have developed a resistance to penicillin are blamed for an increase in pneumonia, ear infections and meningitis, both fatal and nonfatal
131	Discovery disables bacteria's resistance to antibiotics	http://infoweb.newsbank.com/resources/doc/nb/news/0ED3D9353684B67B?p=AWNB	Bacteria have been growing increasingly resistant to antibiotics
132	Study says doctors overuse antibiotics	http://infoweb.newsbank.com/resources/doc/nb/news/0ED3D94821D08728?p=AWNB	Such indiscriminate use of antibiotics has contributed to the emergence of drug-resistant bacteria
133	Antibiotic Abuse Got a cold or sore throat? Do us a favor: tough it out	http://infoweb.newsbank.com/resources/doc/nb/news/0ED3D96658501CA5?p=AWNB	Bacteria that survive antibiotic treatment _ often because the medications were prescribed or used inappropriately _ emerge stronger and more dangerous than before
134	Drug-resistant TB finds fertile ground in Latvia Keeping infected patients in treatment is key factor in controlling outbreak	http://infoweb.newsbank.com/resources/doc/nb/news/0ED3D96ACA6479F7?p=AWNB	Without further treatment, the bacteria in Mrs. Jegorova's ravaged lungs could develop resistance to antibiotics, mutating into a deadly new strain far more difficult to cure
135	Discovery could lead to staph vaccine - Protein shows promise in mice tests, scientists say	http://infoweb.newsbank.com/resources/doc/nb/news/0ED3DAAF3917F7AF?p=AWNB	Many strains of staph already are untreatable with standard drugs, and scientists were shocked to discover last summer that the germ is developing resistance to the antibiotic of last resort, vancomycin
136	Discovery could lead to staph vaccine - Protein shows promise in mice tests, scientists say	http://infoweb.newsbank.com/resources/doc/nb/news/0ED3DAAF3917F7AF?p=AWNB	And because a RAP vaccine wouldn't kill the actual bacteria, as antibiotics do, it wouldn't spur the bugs to mutate into drug-resistant forms that now threaten to become untreatable, Dr. Balaban added
137	Discovery could lead to staph vaccine - Protein shows promise in mice tests, scientists say	http://infoweb.newsbank.com/resources/doc/nb/news/0ED3DAAF3917F7AF?p=AWNB	Antibiotics are losing their effectiveness as more bacteria are exposed to the drugs and mutate to avoid them
138	Antibiotics' use in farm animals draws scrutiny	http://infoweb.newsbank.com/resources/doc/nb/news/0ED3DAC537F9B2D4?p=AWNB	"If we had the emergence of salmonella resistance, it would be a public health emergency
139	Antibiotics' use in farm animals draws scrutiny	http://infoweb.newsbank.com/resources/doc/nb/news/0ED3DAC537F9B2D4?p=AWNB	Other researchers are conducting controlled experiments to measure how resistance develops in livestock
140	Antibiotics' use in farm animals draws scrutiny	http://infoweb.newsbank.com/resources/doc/nb/news/0ED3DAC537F9B2D4?p=AWNB	We have documented an increase in fluoroquinolone-resistant campylobacter
141	Drug defiance - Resistance to new medications is an emerging problem in battle against the AIDS virus	http://infoweb.newsbank.com/resources/doc/nb/news/0ED3DAD12D8C9AC0?p=AWNB	AIDS drug resistance develops much the same way antibiotic resistance does
142	Drug defiance - Resistance to new medications is an emerging problem in battle against the AIDS virus	http://infoweb.newsbank.com/resources/doc/nb/news/0ED3DAD12D8C9AC0?p=AWNB	The same pills that treat an AIDS virus infection, if taken improperly, can encourage the development of drug-defiant strains
143	Drug defiance - Resistance to new medications is an emerging problem in battle against the AIDS virus	http://infoweb.newsbank.com/resources/doc/nb/news/0ED3DAD12D8C9AC0?p=AWNB	Two subjects were infected with strains mutated enough to cause resistance to two protease inhibitors
144	Drug-resistant infection hits local hospitals - Potentially fatal microbe attacks sickest patients	http://infoweb.newsbank.com/resources/doc/nb/news/0ED3DADFAE4BB3CB?p=AWNB	none
145	Study warns of microbe threat - World Health Organization says antibiotic overuse creating resistant bugs	http://infoweb.newsbank.com/resources/doc/nb/news/0ED822CED391F018?p=AWNB	Public-health experts have been concerned about the rise of resistant microbes for years
146	Study warns of microbe threat - World Health Organization says antibiotic overuse creating resistant bugs	http://infoweb.newsbank.com/resources/doc/nb/news/0ED822CED391F018?p=AWNB	It becomes a problem only when disease-causing organisms develop the ability to fight off otherwise disease-curing drugs
147	Study warns of microbe threat - World Health Organization says antibiotic overuse creating resistant bugs	http://infoweb.newsbank.com/resources/doc/nb/news/0ED822CED391F018?p=AWNB	The ability of bacteria, viruses and parasites to become resistant to drugs is a naturally occurring phenomenon involving mutation and survival of the fittest microbes
148	Study warns of microbe threat - World Health Organization says antibiotic overuse creating resistant bugs	http://infoweb.newsbank.com/resources/doc/nb/news/0ED822CED391F018?p=AWNB	Microbes that cause diseases ranging from sore throats and pneumonia to malaria and AIDS are mutating at an alarming rate around the globe into much more dangerous infections that fail to respond to drugs
149	Bacteria gaining on treatments "Superbugs' resist antibiotic wonders	http://infoweb.newsbank.com/resources/doc/nb/news/0EAF4450CDD07CDB?p=AWNB	And experts warn of the likely emergence of an untreatable "Andromeda strain" that could touch off epidemics in hospitals and other facilities.
150	Bacteria gaining on treatments "Superbugs' resist antibiotic wonders	http://infoweb.newsbank.com/resources/doc/nb/news/0EAF4450CDD07CDB?p=AWNB	Mutant forms of tuberculosis, which has resurged sharply in the United States in recent years, can resist as many as 11 drugs and has become a major threat to people who also have the AIDS virus, hastening their deaths
151	Tis THE SEASON	http://infoweb.newsbank.com/resources/doc/nb/news/0EAF44804059BF48?p=AWNB	When you don't finish a course of antibiotics designed to eradicate a certain bug, surviving microbes may find ways to mutate into new, drug-resistant strains
152	Bill would punish overprescription of antibiotics	http://infoweb.newsbank.com/resources/doc/nb/news/0EAF8818EBACA7BA?p=AWNB	Medical experts around the world have expressed increasing concern over the emergence of drug-resistant diseases caused by antibiotic overprescription and overuse
153	Infection strain resists all antibiotics	http://infoweb.newsbank.com/resources/doc/nb/news/0EAF88409FA5CB5F?p=AWNB	The CDC is drafting new guidelines to control the emergence of a possible vancomycin-resistant strain
154	Study: Half pneumonia bacteria resists penicillin	http://infoweb.newsbank.com/resources/doc/nb/news/0EAF886CA384A208?p=AWNB	none
155	Bacteria resisting anti-germ lotions Genetic effects likened to misuse of antibiotics	http://infoweb.newsbank.com/resources/doc/nb/news/0EAF44E898FCBC99?p=AWNB	They also said resistance to triclosan comes from mutations in two genes, called ycjD and fab1
156	New drug added to antibiotic arsenal	http://infoweb.newsbank.com/resources/doc/nb/news/0EAF45401C9C8CEB?p=AWNB	And doctors should not use Synercid when other antibiotics will do because overuse will simply hasten bacteria's inevitable development of resistance against this new drug
157	Antibiotic rushing toward FDA OK	http://infoweb.newsbank.com/resources/doc/nb/news/0EAF456B4577F19A?p=AWNB	Both are powerful medications designed to attack the increasingly drug-resistant bacteria infecting patients in many American hospitals.
158	SPECIAL REPORT Diseases resisting antibiotics Drugs often misused, overused, report says	http://infoweb.newsbank.com/resources/doc/nb/news/0EAF457A296E3921?p=AWNB	Penicillin has become virtually useless in fighting mutant strains of gonorrhea, a venereal disease
159	When drugs fail Bacteria becoming resistant to antibiotics	http://infoweb.newsbank.com/resources/doc/nb/news/0EAF458D5996DF5C?p=AWNB	And while he is gravely concerned about the rise of resistant bacterial infections in children, he can also understand a parent's plight
160	Bacteria in meat resistant to drugs	http://infoweb.newsbank.com/resources/doc/nb/news/0EF41F2E63C579B9?p=AWNB	Overuse of antibiotics in humans and farm animals contributes to the rise of drug-resistant strains of bacteria
161	Curbing antibiotic overuse	http://infoweb.newsbank.com/resources/doc/nb/news/0F8916C572E16BEE?p=AWNB	The root of the problem of rapidly rising antibiotic resistance is simple
162	Curbing antibiotic overuse	http://infoweb.newsbank.com/resources/doc/nb/news/0F8916C572E16BEE?p=AWNB	Unfortunately, ongoing exposure to antibiotics has allowed many forms of bacteria to develop resistance to these important medications
163	EDITORIAL - Ban antibiotics for livestock	http://infoweb.newsbank.com/resources/doc/nb/news/10BCF20F96270D10?p=AWNB	Since then, about 21 percent of the bacteria in human food poisoning cases have developed resistance to Cipro, says the Centers for Disease Control.
164	EAR INFECTIONS ACCOUNT FOR AT LEAST 25 PERCENT OF PRESCRIBED U.S. - ANTIBIOTIC USE, BUT THE DRUGS ARE SHOWING SIGNS OF LOSING THEIR - POWER. - Germs' warfare	http://infoweb.newsbank.com/resources/doc/nb/news/1186B8F7AD704F18?p=AWNB	There's no question that there are increasing strains of bacteria that are resistant
165	EAR INFECTIONS ACCOUNT FOR AT LEAST 25 PERCENT OF PRESCRIBED U.S. - ANTIBIOTIC USE, BUT THE DRUGS ARE SHOWING SIGNS OF LOSING THEIR - POWER. - Germs' warfare	http://infoweb.newsbank.com/resources/doc/nb/news/1186B8F7AD704F18?p=AWNB	Even with perfect compliance - no missed doses, no spit-up pink syrup - antibiotic use pushes bacteria to develop resistance
166	ANTIBIOTICS IN FAILING HEALTH - Becteria are increasingly resistant to drugs, as in the TB case and research is lagging	http://infoweb.newsbank.com/resources/doc/nb/news/119DB637BAA3F298?p=AWNB	In the past decade, federal agencies - such as the Centers for Disease Control and Prevention, the National Institutes of Health, and the Food and Drug Administration - have warned that antibiotic overuse has led to evolving drug-resistant bacteria.
167	ANTIBIOTICS IN FAILING HEALTH - Becteria are increasingly resistant to drugs, as in the TB case and research is lagging	http://infoweb.newsbank.com/resources/doc/nb/news/119DB637BAA3F298?p=AWNB	1988-95: Studies in Finland, the Netherlands and other European countries find increased drug resistance in farm animals. Many of the livestock are fed antibiotics as growth-promoters
168	New tainted-meat concerns - U.S. action is urged as salmonella outbreaks rise, but the industry touts proper cooking.	http://infoweb.newsbank.com/resources/doc/nb/news/13BE947BCC460378?p=AWNB	The meat - which has sickened 16 people - is tainted with one of four strains of salmonella that became resistant to multiple antibiotics as they evolved to survive
169	New tainted-meat concerns - U.S. action is urged as salmonella outbreaks rise, but the industry touts proper cooking.	http://infoweb.newsbank.com/resources/doc/nb/news/13BE947BCC460378?p=AWNB	The frequency of outbreaks linked to antibiotic-resistant salmonella is rising, causing concern among consumer groups and food scientists
170	What you don't know about antibiotics can hurt you	http://infoweb.newsbank.com/resources/doc/nb/news/0ED7B51966949DDD?p=AWNB	the failure to take enough of an antibiotic to wipe out a bacterial infection totally is largely responsible for the emergence of resistance
171	What you don't know about antibiotics can hurt you	http://infoweb.newsbank.com/resources/doc/nb/news/0ED7B51966949DDD?p=AWNB	Of the patients who failed to finish their prescription, 94 percent said they feared the development of bacterial resistance
172	Researchers flick gene switch, turn off antibiotic resistance	http://infoweb.newsbank.com/resources/doc/nb/news/0ED7B884690577D3?p=AWNB	bacteria have been growing increasingly resistant to antibiotics
173	CF patients may soon get inhaled drug	http://infoweb.newsbank.com/resources/doc/nb/news/0ED7B8D8A91AA7C5?p=AWNB	to answer lingering questions about side effects and drug resistance that may develop in continuous users
174	Antibiotic aimed at ending threat of drug-resistant bacteria is OK'd	http://infoweb.newsbank.com/resources/doc/nb/news/0ED7BABBA6F4018D?p=AWNB	overuse will simply hasten bacteria's inevitable development of resistance against this new drug
175	New antibiotic joins fight against germs	http://infoweb.newsbank.com/resources/doc/nb/news/0ED7BABF86713EFC?p=AWNB	We believe that resistance will be very slow to emerge
176	People too clean for their own good, expert says	http://infoweb.newsbank.com/resources/doc/nb/news/0EB4884F929501A1?p=AWNB	none
177	Drug-resistant salmonella infects U.S. children	http://infoweb.newsbank.com/resources/doc/nb/news/0EB488AC659B03AB?p=AWNB	Salmonella illnesses resistant to the standard drug used to treat serious forms of the infection in children are emerging nationwide
178	ANTIBIOTIC RESISTANCE / FDA must evaluate drug use on healthy farm animals	http://infoweb.newsbank.com/resources/doc/nb/news/0EE192AB412A43C7?p=AWNB	There is no proof that the routine practice of farmers and ranchers' giving healthy cows, pigs and chickens antibiotics to help them grow faster leads to the development of antibiotic-resistant bugs harmful to human health
179	Poultry industry cuts antibiotic use Companies heed groups' concerns	http://infoweb.newsbank.com/resources/doc/nb/news/0F19F3437645E3F1?p=AWNB	none
180	Half of chicken sold tainted with bacteria	http://infoweb.newsbank.com/resources/doc/nb/news/0F8045C9F355BE10?p=AWNB	The tests also indicated that the massive amounts of antibiotics fed to the chickens apparently are making humans increasingly resistant to the antibiotics
181	Half of chicken sold tainted with bacteria	http://infoweb.newsbank.com/resources/doc/nb/news/0F8045C9F355BE10?p=AWNB	In 1990, the Centers for Disease Control and Prevention recorded no evidence of such resistance, indicating that the bacteria has genetically mutated to survive an antibiotic dosage
182	More germs in U.S. able to resist drugs - Study also forecasts rise in form of strep	http://infoweb.newsbank.com/resources/doc/nb/news/0F9B4DD00F33AB40?p=AWNB	Drug-resistant germs are on the rise in the United States
183	More germs in U.S. able to resist drugs - Study also forecasts rise in form of strep	http://infoweb.newsbank.com/resources/doc/nb/news/0F9B4DD00F33AB40?p=AWNB	Penicillin resistance rose from 21.7 percent of strep strains in 1996 to 26.6 percent in 1999, and for erythromycin it increased from 10.8 percent to 20.2 percent
184	FDA OKs pill for travelers' ills - About 400f Americans visiting Mexico become sick	http://infoweb.newsbank.com/resources/doc/nb/news/102D9FD16BAB19B2?p=AWNB	DuPont's studies suggest it develops little resistance in the bacteria it helps the body fight
185	HEALTH & MEDICINE - Compound may fight antibiotic resistance - Researchers say new finding in soil could be critical in the ongoing battle against infections	http://infoweb.newsbank.com/resources/doc/nb/news/111B45F95BF04058?p=AWNB	The discovery could provide a vital weapon in the ongoing battle against infectious bacteria, which are constantly evolving defenses to the drugs used against them
186	HEALTH & MEDICINE - Compound may fight antibiotic resistance - Researchers say new finding in soil could be critical in the ongoing battle against infections	http://infoweb.newsbank.com/resources/doc/nb/news/111B45F95BF04058?p=AWNB	With the emergence of "superbugs" that are resistant to even the most potent antibiotics,
187	HEALTH & MEDICINE - Compound may fight antibiotic resistance - Researchers say new finding in soil could be critical in the ongoing battle against infections	http://infoweb.newsbank.com/resources/doc/nb/news/111B45F95BF04058?p=AWNB	That increased the likelihood that any promising compound they discovered would be something for which the bacteria had not yet developed a resistance
188	Drug for cattle may get OK, despite human risk - FDA likely will approve antibiotic, but experts say use could lead to more resistant microbes	http://infoweb.newsbank.com/resources/doc/nb/news/117ADBC309D00620?p=AWNB	giving cefquinome to animals would probably speed the emergence of microbes resistant to that important class of antibiotic
189	Antibiotics are of no help for sinus infections - Study says the drugs may do more harm than good	http://infoweb.newsbank.com/resources/doc/nb/news/11D5D592EA8C97E8?p=AWNB	The widespread use of standard antibiotics to treat sinus infections does not help cure patients and may harm them by increasing their resistance to the drugs
190	Lives at stake Let's open the pipeline for new antibiotics.	http://infoweb.newsbank.com/resources/doc/nb/news/1368E86875A58158?p=AWNB	none
191	ANOTHER VOICE - The Washington Post - Threat to modern medicine	http://infoweb.newsbank.com/resources/doc/nb/news/13FFDC9B4035AE30?p=AWNB	Through the relentless process of evolution, pathogens are evading the drugs, a problem known as antimicrobial resistance
192	Drug-Resistant Strain Of TB Raises Red Flag In Medical World; Is Charity The Cure?; Lilly exec says science, economics aren't enough to solve the problem	http://www.lexisnexis.com/lnacui2api/api/version1/getDocCui?lni=4C1W-4P20-01J8-W4VC&csi=270944,270077,11059,8411&hl=t&hv=t&hnsd=f&hns=t&hgn=t&oc=00240&perma=true	With patients developing resistance to drugs, what's a drug maker to do?
193	Drug-Resistant Strain Of TB Raises Red Flag In Medical World; Is Charity The Cure?; Lilly exec says science, economics aren't enough to solve the problem	http://www.lexisnexis.com/lnacui2api/api/version1/getDocCui?lni=4C1W-4P20-01J8-W4VC&csi=270944,270077,11059,8411&hl=t&hv=t&hnsd=f&hns=t&hgn=t&oc=00240&perma=true	MDR-TB develops in places where patients do use drugs but the bacteria mutate to resist them
194	Bacteria Muscle Up, But Never Mind That; Drug Firms Turn Away; Antibiotics are needed, expert says, but financial incentives are lacking	http://www.lexisnexis.com/lnacui2api/api/version1/getDocCui?lni=4C9B-43R0-01J8-W0XD&csi=270944,270077,11059,8411&hl=t&hv=t&hnsd=f&hns=t&hgn=t&oc=00240&perma=true	none
195	Bacteria Muscle Up, But Never Mind That; Drug Firms Turn Away; Antibiotics are needed, expert says, but financial incentives are lacking	http://www.lexisnexis.com/lnacui2api/api/version1/getDocCui?lni=4C9B-43R0-01J8-W0XD&csi=270944,270077,11059,8411&hl=t&hv=t&hnsd=f&hns=t&hgn=t&oc=00240&perma=true	none
196	Developments in Brief Strains of Gonorrhea Prove Drug-Resistant: [Home Edition]	http://search.proquest.com/latimes/docview/292756966/70C74B7A35334FB8PQ/19?accountid=14512	Bacteria that cause gonorrhea are quickly developing resistance to another antibiotic
197	Developments in Brief Salmonella Growing Resistant to Antibiotics: [Home Edition]	http://search.proquest.com/latimes/docview/292628124/70C74B7A35334FB8PQ/22?accountid=14512	Salmonella, the bacteria found in milk and meat products and a common cause of food poisoning, is becoming increasingly resistant to antibiotics and may become difficult to treat in future outbreaks, government researchers warn.
198	`Jumping Genes' Blamed for Resistant Bacteria: [Bulldog Edition]	http://search.proquest.com/latimes/docview/280714520/E503DAF8B2A24B61PQ/27?accountid=14512	This practice has led to tougher bacterial strains that have evolved to successfully fight off the drugs by chemically neutralizing them
199	`Jumping Genes' Blamed for Resistant Bacteria: [Bulldog Edition]	http://search.proquest.com/latimes/docview/280714520/E503DAF8B2A24B61PQ/27?accountid=14513	In the United States, resistant bacteria are very common in hospitals, where they have developed the necessary mechanisms to resist a variety of antibiotics
200	`Jumping Genes' Blamed for Resistant Bacteria: [Bulldog Edition]	http://search.proquest.com/latimes/docview/280714520/E503DAF8B2A24B61PQ/27?accountid=14514	Infectious bacteria equipped with "jumping genes" are becoming increasingly resistant to antibiotics, forcing development of new treatment strategies for several diseases
201	HEALTH Kids and Antibiotics Parents, Doctors Worried Sick About Overuse of Wonder Drugs: [Home Edition]	http://search.proquest.com/latimes/docview/280761515/E503DAF8B2A24B61PQ/30?accountid=14512	For example, haemophilius influenza, one of the most common microorganisms causing ear infections in infants and children, has developed a resistance in 20% to 60% of cases to ampicillin and amoxicillin, two penicillin derivatives
202	Health Officials Call for New Fight on Drug-Resistant Types of TB: [Home Edition]	http://search.proquest.com/latimes/docview/281655467/E503DAF8B2A24B61PQ/60?accountid=14512	remaining TB bacteria developed resistance to the drug
203	Cover Story Take Two Herbs and Call Me in the Morning Health: Your child is teething or has an earache? Responding to growing demand from parents, many doctors are prescribing homeopathic remedies. But they caution that such treatments are not a cure-all.: [Home Edition]	http://search.proquest.com/latimes/docview/282257431/E503DAF8B2A24B61PQ/87?accountid=14512	And bacteria have developed a resistance to antibiotic
204	Antiseptic Curbs Blindness, UCLA Researchers Say Medicine: Kenya study shows form of Betadine used on newborns prevents infections. It is safer and cheaper than widely used silver nitrate, research finds.: [Home Edition]	http://search.proquest.com/latimes/docview/292979901/E503DAF8B2A24B61PQ/99?accountid=14512	Bacteria also do not seem to develop resistance to it, as they do to antibiotics
205	Drug-Resistant Bacteria Pose an Increasing Threat Health: About 13,000 die in U.S. each year from germs that have developed a tolerance for common antibiotics.: [Home Edition]	http://search.proquest.com/latimes/docview/293080263/F07FD7ADAC4943C9PQ/102?accountid=14512	And experts warn of the likely emergence of an untreatable "Andromeda strain"
206	Drug-Resistant Bacteria Pose an Increasing Threat Health: About 13,000 die in U.S. each year from germs that have developed a tolerance for common antibiotics.: [Home Edition]	http://search.proquest.com/latimes/docview/293080263/F07FD7ADAC4943C9PQ/102?accountid=14513	Although resistance went up only slowly through the 1960s, some bacteria began developing strong resistance in the 1970s
207	Drug-Resistant Bacteria Pose an Increasing Threat Health: About 13,000 die in U.S. each year from germs that have developed a tolerance for common antibiotics.: [Home Edition]	http://search.proquest.com/latimes/docview/293080263/F07FD7ADAC4943C9PQ/102?accountid=14514	While antibiotic resistance is increasing in a variety of bacteria
208	Drug-Resistant Bacteria Pose an Increasing Threat Health: About 13,000 die in U.S. each year from germs that have developed a tolerance for common antibiotics.: [Home Edition]	http://search.proquest.com/latimes/docview/293080263/F07FD7ADAC4943C9PQ/102?accountid=14515	And resistant mutants have spread to virtually every nation
209	Germs Far More Resistant to Penicillin: [Home Edition]	http://search.proquest.com/latimes/docview/293126091/F07FD7ADAC4943C9PQ/106?accountid=14512	Still, the Barcelona researchers have also observed an "alarming" rise in pneumonia bugs resistant to the drug cephalosporin, a second line of defense after penicillin
210	Germs Far More Resistant to Penicillin: [Home Edition]	http://search.proquest.com/latimes/docview/293126091/F07FD7ADAC4943C9PQ/106?accountid=14513	To counteract the rise in drug resistance
211	Germs Far More Resistant to Penicillin: [Home Edition]	http://search.proquest.com/latimes/docview/293126091/F07FD7ADAC4943C9PQ/106?accountid=14514	Don't go and ask your doctor for an antibiotic if you just have a cold," said UCLA's Katona. "If you do, you are contributing to the emergence of drug-resistant bacteria
212	Old and New Infectious Diseases Trigger Global Struggle; Medicine: Dense populations, adaptable bugs and man's encroachment on nature are blamed. Health experts react slowly.: [Bulldog Edition]	http://search.proquest.com/latimes/docview/293382482/F07FD7ADAC4943C9PQ/115?accountid=14512	It'll either be our technology or it will be the evolution of the germ world that will have established its ascendancy
213	Old and New Infectious Diseases Trigger Global Struggle; Medicine: Dense populations, adaptable bugs and man's encroachment on nature are blamed. Health experts react slowly.: [Bulldog Edition]	http://search.proquest.com/latimes/docview/293382482/F07FD7ADAC4943C9PQ/115?accountid=14513	And the halfhearted drug treatment has given another batch of TB bacilli the time and space to mutate into resistant forms
214	Scientists Halt Bacteria's Resistance to Antibiotics; Medicine: Discovery could help restore usefulness of front-line drugs, reverse major crisis in treatment of infections.: [Home Edition]	http://search.proquest.com/latimes/docview/421334199/F07FD7ADAC4943C9PQ/129?accountid=14512	Bacteria have been growing increasingly resistant to antibiotics
215	Antibiotics Overprescribed, Study Finds: [Orange County Edition]	http://search.proquest.com/latimes/docview/421347930/F07FD7ADAC4943C9PQ/134?accountid=14512	As that resistant germ multiplies, it can exchange genetic material with other germs of the same type, transferring the ability to withstand the antibiotic to them and giving rise to new, resistant strains.
216	Antibiotics Overprescribed, Study Finds: [Orange County Edition]	http://search.proquest.com/latimes/docview/421347930/F07FD7ADAC4943C9PQ/134?accountid=14513	researchers say that it offers the most complete picture yet of how routine medical care can contribute to what the Centers for Disease Control and Prevention calls the "emerging global problem of antimicrobial resistance
217	Antibiotics Overprescribed, Study Finds: [Orange County Edition]	http://search.proquest.com/latimes/docview/421347930/F07FD7ADAC4943C9PQ/134?accountid=14514	identify where they can decrease unnecessary antimicrobial use by improving diagnostic methods or communicating with patients concerning the lack of benefit, potential adverse effects, and development of resistance associated with such therapy."
218	Scientists Find New Way to Foil Staph Bacteria; Medicine: Instead of killing germs, immunization blocks toxin release. Resistance is less likely to develop.: [Home Edition]	http://search.proquest.com/latimes/docview/421285749/F07FD7ADAC4943C9PQ/143?accountid=14512	As soon as researchers introduce a new antibiotic, bacteria begin developing resistance to it
219	Scientists Find New Way to Foil Staph Bacteria; Medicine: Instead of killing germs, immunization blocks toxin release. Resistance is less likely to develop.: [Home Edition]	http://search.proquest.com/latimes/docview/421285749/F07FD7ADAC4943C9PQ/143?accountid=14513	it appears that the mutational ability of the bacterium may be outrunning the innovations of chemists
220	The Superbug Threat: [Home Edition]	http://search.proquest.com/latimes/docview/421249581/F07FD7ADAC4943C9PQ/145?accountid=14512	But there's little doubt that "growth promoters," antibiotics in livestock feed, help foster the development of new strains of superbugs
221	The Superbug Threat: [Home Edition]	http://search.proquest.com/latimes/docview/421249581/F07FD7ADAC4943C9PQ/145?accountid=14513	infections by a strain of the intestinal bug salmonella that can be killed only by last-ditch antibiotic therapy are rapidly increasing
222	The Superbug Threat: [Home Edition]	http://search.proquest.com/latimes/docview/421249581/F07FD7ADAC4943C9PQ/145?accountid=14514	but random mutations that create superbugs will always occur
223	SCIENCE FILE; Science in Brief; Bacterium Resistant to Antibiotic Kills Another Hospital Patient: [Home Edition]	http://search.proquest.com/latimes/docview/421365690/F07FD7ADAC4943C9PQ/157?accountid=14512	the antibiotic of last resort for bacteria that have developed resistance to all others
224	SUNDAY REPORT; Biotech Battlefield: Profits vs. Public; Private companies are refusing to share the genetic code of a deadly staph bacterium. They say it cost them millions to discover, but officials say the data are needed to avert a public health crisis.: [Home Edition]	http://search.proquest.com/latimes/docview/421377246/F07FD7ADAC4943C9PQ/158?accountid=14512	But in recent years many organisms have developed a resistance to these drugs
225	Parent Pressure Cited in Overuse of Antibiotics: [Orange County Edition]	http://search.proquest.com/latimes/docview/421497694/F07FD7ADAC4943C9PQ/159?accountid=14512	because bacteria have developed resistance to them
226	It's a Matter of Health: [Home Edition]	http://search.proquest.com/latimes/docview/421376450/F07FD7ADAC4943C9PQ/161?accountid=14512	Several strains of bacteria have in the last decade developed resistance to the most powerful antibiotics
227	It's a Matter of Health: [Home Edition]	http://search.proquest.com/latimes/docview/421376450/F07FD7ADAC4943C9PQ/161?accountid=14513	These mutant strains of bacteria have developed immunities to antibiotics and can infect humans who handle raw meat and poultry,
228	VENTURA COUNTY NEWS; Newborn's Illness Puts Strep B in Spotlight; Health: Oxnard woman who carried rare form of meningitis during her pregnancy launches a campaign to educate others.: [Ventura County Edition]	http://search.proquest.com/latimes/docview/421399935/F07FD7ADAC4943C9PQ/162?accountid=14512	none
229	Commentary; Will We Win the Fight Against the Superbugs?; Health: More research, funding and consumer awareness are needed to beat resistance to antibiotics.: [Home Edition]	http://search.proquest.com/latimes/docview/421426518/F07FD7ADAC4943C9PQ/167?accountid=14512	required to help fend off not only recurrent infection but also the development of antibiotic resistance
230	Commentary; Will We Win the Fight Against the Superbugs?; Health: More research, funding and consumer awareness are needed to beat resistance to antibiotics.: [Home Edition]	http://search.proquest.com/latimes/docview/421426518/F07FD7ADAC4943C9PQ/167?accountid=14513	If we do not stop the increase in hospital-acquired antibiotic resistance
231	INSIDE STORY; The Enemy Within; You Probably Don't Want to Know What Dr. David Pegues Knows About Hospitals, About Those Nasty, Drug- Resistant Microbes Lying in Wait. But What the Germ Warrior Knows Just Might Save Your Life.: [Home Edition]	http://search.proquest.com/latimes/docview/421625290/F07FD7ADAC4943C9PQ/169?accountid=14512	It's a fluid, inexorable process of evolution. Every time we figure out a way to kill them, new resistances eventually emerge
232	INSIDE STORY; The Enemy Within; You Probably Don't Want to Know What Dr. David Pegues Knows About Hospitals, About Those Nasty, Drug- Resistant Microbes Lying in Wait. But What the Germ Warrior Knows Just Might Save Your Life.: [Home Edition]	http://search.proquest.com/latimes/docview/421625290/F07FD7ADAC4943C9PQ/169?accountid=14513	In this hothouse, the most virulent strains emerge
233	INSIDE STORY; The Enemy Within; You Probably Don't Want to Know What Dr. David Pegues Knows About Hospitals, About Those Nasty, Drug- Resistant Microbes Lying in Wait. But What the Germ Warrior Knows Just Might Save Your Life.: [Home Edition]	http://search.proquest.com/latimes/docview/421625290/F07FD7ADAC4943C9PQ/169?accountid=14514	Once they develop, hospital-bred superbugs may attack patients rendered all but defenseless by disease or by medical interventions
234	INSIDE STORY; The Enemy Within; You Probably Don't Want to Know What Dr. David Pegues Knows About Hospitals, About Those Nasty, Drug- Resistant Microbes Lying in Wait. But What the Germ Warrior Knows Just Might Save Your Life.: [Home Edition]	http://search.proquest.com/latimes/docview/421625290/F07FD7ADAC4943C9PQ/169?accountid=14515	"wild strains" of bacteria--those that can be killed by antibiotics--reclaim their turf from the mutants
235	The Dirt on Being Skeaky Clean; Hygiene: Experts wonder if antibacterial soaps and cleansers are actually contributing to weaker immune systems.: [Home Edition]	http://search.proquest.com/latimes/docview/421589390/D09D37E1A6284632PQ/192?accountid=14512	Americans will become lackadaisical at a time of increasing high-profile germs such as E. coli
236	Science File; In Brief; Finding May Aid Fight Against Gum Disease: [Home Edition]	http://search.proquest.com/latimes/docview/421646689/D09D37E1A6284632PQ/194?accountid=14512	none
237	U.S. STRIKES BACK; ANTHRAX SCARE; COLUMN ONE; Cure May Be Health Hazard; Many doctors bend to pressure from patients who want antibiotics after anthrax scares. Misuse could raise the dangers of resistance.: [Home Edition]	http://search.proquest.com/latimes/docview/421641511/D09D37E1A6284632PQ/203?accountid=14512	Even those who don't take Cipro could develop infections resistant to it
238	RESPONSE TO TERROR; Health Experts Fear Cipro Risks as Drug Given to 7,000 in N.Y.: [Home Edition]	http://search.proquest.com/latimes/docview/421674917/D09D37E1A6284632PQ/206?accountid=14512	Bacteria can grow resistant to the drug, leading to the development of infections that are hard to kill
239	The State; Resistance Leads to Fewer Options for Treating STD; Health: Officials fear that California doctors may be forced to stop prescribing Cipro and other common antibiotics in gonorrhea cases.: [Home Edition]	http://search.proquest.com/latimes/docview/421691532/D09D37E1A6284632PQ/218?accountid=14512	A rise in a drug-resistant form of gonorrhea in California
240	The State; Resistance Leads to Fewer Options for Treating STD; Health: Officials fear that California doctors may be forced to stop prescribing Cipro and other common antibiotics in gonorrhea cases.: [Home Edition]	http://search.proquest.com/latimes/docview/421691532/D09D37E1A6284632PQ/218?accountid=14513	Gonorrhea, considered a "smart" bacteria, long ago developed mechanisms to resist other antibiotics, including penicillin.
241	The State; Resistance Leads to Fewer Options for Treating STD; Health: Officials fear that California doctors may be forced to stop prescribing Cipro and other common antibiotics in gonorrhea cases.: [Home Edition]	http://search.proquest.com/latimes/docview/421691532/D09D37E1A6284632PQ/218?accountid=14514	The increased level of resistance,
242	Resistant Strep Sounds a Warning: [HOME EDITION]	http://search.proquest.com/latimes/docview/421710454/D09D37E1A6284632PQ/223?accountid=14512	there appears to be at least some increase in this resistance compared to previous years
243	Health Matters; Antibiotics and the Chicken Connection: [HOME EDITION]	http://search.proquest.com/latimes/docview/421713946/D09D37E1A6284632PQ/230?accountid=14512	the widespread use of fluoroquinolones in animals, even when limited to therapeutic use, will hasten the emergence of resistance, especially in bacteria transmitted by food
244	Health Matters; Antibiotics and the Chicken Connection: [HOME EDITION]	http://search.proquest.com/latimes/docview/421713946/D09D37E1A6284632PQ/230?accountid=14513	They also found that drug-resistant infections increased significantly in humans, from 0.8% in 1996 to 3% in 1998.
245	Health Matters; Antibiotics and the Chicken Connection: [HOME EDITION]	http://search.proquest.com/latimes/docview/421713946/D09D37E1A6284632PQ/230?accountid=14514	Those that remain mutate and rapidly become resistant to the antibiotics.
246	Not Above Popping Pills Meant for Pets; Medication* To cut costs or save time, some people take drugs intended for animals, a risky practice.: [HOME EDITION]	http://search.proquest.com/latimes/docview/421712594/D09D37E1A6284632PQ/231?accountid=14512	bacteria eventually evolve defenses against the drugs.
247	Los Angeles; County Orders Reports on Illness; Health: Starting next month, doctors must add invasive pneumococcal disease to the list of ailments they track. Officials hope to assess resistance to antibiotics.: [HOME EDITION]	http://search.proquest.com/latimes/docview/421908965/D09D37E1A6284632PQ/233?accountid=14512	Officials are worried that the sometimes fatal disease, which causes meningitis and blood infections, will develop resistance to other medications
248	Medicine; IN THE LAB; Enlisting viruses to battle bacteria: [HOME EDITION]	http://search.proquest.com/latimes/docview/421933699/D09D37E1A6284632PQ/243?accountid=14512	none
249	California; State Senate Approves Measure to Monitor Livestock; Bill would mandate that antibiotics usage be reported to help study how it affects growing resistance to the drugs.: [HOME EDITION]	http://search.proquest.com/latimes/docview/421796568/D09D37E1A6284632PQ/247?accountid=14512	The FDA already has acknowledged that at least one class of antibiotics used in poultry -- fluoroquinolones -- is partially to blame for the development of antibiotic-resistant infections in humans.
250	California; State Senate Approves Measure to Monitor Livestock; Bill would mandate that antibiotics usage be reported to help study how it affects growing resistance to the drugs.: [HOME EDITION]	http://search.proquest.com/latimes/docview/421796568/D09D37E1A6284632PQ/247?accountid=14513	Sher said the bill is intended to help determine what role these drugs are playing in the increased resistance to antibiotics in humans.
251	PUBLIC HEALTH; Some Cipro With That Burger?; McDonald's antibiotic policy may not be perfect, but it's better than the FDA's.: [HOME EDITION]	http://search.proquest.com/latimes/docview/422025305/D09D37E1A6284632PQ/250?accountid=14512	none
252	Capsules; Sounding a caution about ear drops: [HOME EDITION]	http://search.proquest.com/latimes/docview/421908347/D09D37E1A6284632PQ/257?accountid=14512	They found a "tremendous increase" in the incidence of fungal infections and resistant staph infections in the youngsters' ear canals,
253	Capsules; One remedy for antibiotic overuse: [HOME EDITION]	http://search.proquest.com/latimes/docview/421921730/D09D37E1A6284632PQ/258?accountid=14512	none
254	MEDICINE; Drug-resistant bugs find sanctuary in our noses; As many as 2 million Americans may be harboring the resilient staph strain.: [HOME EDITION]	http://search.proquest.com/latimes/docview/422011414/D09D37E1A6284632PQ/276?accountid=14512	Uncompleted courses of treatment don't wipe out the infection and can strengthen the bacteria, allowing it to develop resistance to another antibiotic.
255	THE NATION; Virulent Drug-Resistant TB Strain Emerges: [HOME EDITION]	http://search.proquest.com/latimes/docview/422065339/D09D37E1A6284632PQ/279?accountid=14512	The evolution of drugresistant strains of Mycobacterium tuberculosis is a result
256	THE NATION; Virulent Drug-Resistant TB Strain Emerges: [HOME EDITION]	http://search.proquest.com/latimes/docview/422065339/D09D37E1A6284632PQ/279?accountid=14513	A "virtually untreatable" form of tuberculosis -- resistant to at least five classes of antibiotics -- is quickly emerging across the globe, according to a federal report released Thursday.
257	Hospitals Report Increase in Drug-Resistant Staph Infections: [HOME EDITION]	http://search.proquest.com/latimes/docview/422104164/D09D37E1A6284632PQ/284?accountid=14512	none
258	A CLOSER LOOK: ANTI-LISTERIA SPRAY; Latest food additive: Viruses; The FDA-approved bacteria eaters work on deli meats and other ready- to-eat foods.: [HOME EDITION]	http://search.proquest.com/latimes/docview/422201681/D09D37E1A6284632PQ/285?accountid=14512	In other words, "there is lots of protection in case a mutation occurred
259	Drug-resistant gonorrhea spreading rapidly in U.S.; Changes in treatment are recommended to combat the increase.: [HOME EDITION]	http://search.proquest.com/latimes/docview/422131314/D09D37E1A6284632PQ/299?accountid=14512	The rate of drug resistance continued to rise after the state advised against fluoroquinolones in 2002
260	Drug-resistant gonorrhea spreading rapidly in U.S.; Changes in treatment are recommended to combat the increase.: [HOME EDITION]	http://search.proquest.com/latimes/docview/422131314/D09D37E1A6284632PQ/299?accountid=14513	fluoroquinolone-resistant gonorrhea began emerging in Hawaii
261	Drug-resistant gonorrhea spreading rapidly in U.S.; Changes in treatment are recommended to combat the increase.: [HOME EDITION]	http://search.proquest.com/latimes/docview/422131314/D09D37E1A6284632PQ/299?accountid=14514	bacterium has been developing resistance since the first drugs to fight it
262	Prescription for trouble; The FDA should deny a request to use a key human antibiotic on beef cattle. The risks are too great.: [HOME EDITION]	http://search.proquest.com/latimes/docview/422153738/D09D37E1A6284632PQ/300?accountid=14512	bacteria started evolving to resist the miracle drugs
263	The nation; Spread of TB from patient unlikely, tests show; No bacteria have been found in mucus from his lungs. The negative results are a step toward easing his confinement.: [HOME EDITION]	http://search.proquest.com/latimes/docview/422133159/D09D37E1A6284632PQ/306?accountid=14512	none
264	TB terror; Governments must come up with funds to squelch drug- resistant strains of the disease before it turns into a global scourge.: [HOME EDITION]	http://search.proquest.com/latimes/docview/422127109/D09D37E1A6284632PQ/307?accountid=14512	none
265	The World; British hospitals struggle to contain deadly infections: [HOME EDITION]	http://search.proquest.com/latimes/docview/422116438/D09D37E1A6284632PQ/316?accountid=14512	none
266	THE NATION; Antibiotics may not help sinus infections; A study comparing the use of a placebo with the drug finds little difference. Patience and over-the-counter remedies are preferred.	http://search.proquest.com/latimes/docview/422196464/7310D771D6344006PQ/322?accountid=14512	The widespread use of standard antibiotics to treat sinus infections does not help cure patients and may harm them by increasing their resistance to the drugs
267	TURKEY'S LEAN PROFILE; Bad medicine?; Treating poultry (and other food animals) with antibiotics could lead to some serious health consequences for human beings.	http://search.proquest.com/latimes/docview/422226321/7310D771D6344006PQ/335?accountid=14512	But since the mid-1990s, resistance to Cipro has risen from 2% to 20% or even higher
268	TURKEY'S LEAN PROFILE; Bad medicine?; Treating poultry (and other food animals) with antibiotics could lead to some serious health consequences for human beings.	http://search.proquest.com/latimes/docview/422226321/7310D771D6344006PQ/335?accountid=14513	Antibiotic resistance develops when antibiotics kill off only some of the bacteria they're supposed to
269	THE WORLD; 'Ecological sacrifice zone' in India; Water in a town with pharmaceutical plants that supply the U.S. is tainted with antibiotics and other strong drugs.	http://search.proquest.com/latimes/docview/422294508/7310D771D6344006PQ/337?accountid=14512	Not only is there the danger of antibiotic-resistant bacteria evolving
270	THE WORLD; 'Ecological sacrifice zone' in India; Water in a town with pharmaceutical plants that supply the U.S. is tainted with antibiotics and other strong drugs.	http://search.proquest.com/latimes/docview/422294508/7310D771D6344006PQ/337?accountid=14513	But in recent years many bacteria have developed resistance to the drug
271	THE WORLD; 'Ecological sacrifice zone' in India; Water in a town with pharmaceutical plants that supply the U.S. is tainted with antibiotics and other strong drugs.	http://search.proquest.com/latimes/docview/422294508/7310D771D6344006PQ/337?accountid=14514	The more bacteria is exposed to a drug, the more likely that bacteria will mutate in a way that renders the drug ineffective.)
272	THE NATION; Deadly bacteria defy antibiotics; Hospitals are vulnerable to new drug-resistant strains, and experts fear the toll could rise.	http://search.proquest.com/latimes/docview/422252808/7310D771D6344006PQ/338?accountid=14512	Similarly resistant strains of Pseudomonas and Acinetobacter also are on the rise, as are resistant strains of Escherichia coli, another gram-negative bacterium.
273	Getting the monster back into the box; Drug-resistant staph is a problem of our own making that we must combat aggressively.	http://search.proquest.com/latimes/docview/422349730/7310D771D6344006PQ/349?accountid=14512	But if you follow the breadcrumbs of MRSA's emergence through the many silos of medicine
274	A CLOSER LOOK; FDA reviews safety of antibacterial use; New studies suggest that products made with the chemical triclosan could harm humans and wildlife.	http://search.proquest.com/latimes/docview/219929884/7310D771D6344006PQ/350?accountid=14512	These have become a huge problem around the world with the rise of superbugs
275	New life for old bacteria fighters; Remedies once called risky are reconsidered as pathogens outsmart modern antibiotics.	http://search.proquest.com/latimes/docview/613561371/7310D771D6344006PQ/354?accountid=14512	bacteria have not had much chance to develop resistance to them
276	New life for old bacteria fighters; Remedies once called risky are reconsidered as pathogens outsmart modern antibiotics.	http://search.proquest.com/latimes/docview/613561371/7310D771D6344006PQ/354?accountid=14513	Overuse continues to be a problem with antibiotics because of bacteria's ability to mutate and develop resistance in response to continued exposure to a drug.
277	IN THE WORKS; BACTERIA BATTLERS; With antibiotic resistance rising, scientists look to frogs, roaches and elsewhere for new weapons.	http://search.proquest.com/latimes/docview/754971015/7310D771D6344006PQ/356?accountid=14512	In this ever-escalating battle, the bacteria evolve ways to avoid every drug humans throw at them.
278	IN THE WORKS; BACTERIA BATTLERS; With antibiotic resistance rising, scientists look to frogs, roaches and elsewhere for new weapons.	http://search.proquest.com/latimes/docview/754971015/7310D771D6344006PQ/356?accountid=14513	so there's little incentive to develop resistance
279	Showdown looms over antibiotics; A federal proposal would sharply limit their use in animals raised for food.	http://search.proquest.com/latimes/docview/821895595/7310D771D6344006PQ/358?accountid=14512	Already some difficult-to-treat strains of E. coli and salmonella have evolved
280	Showdown looms over antibiotics; A federal proposal would sharply limit their use in animals raised for food.	http://search.proquest.com/latimes/docview/821895595/7310D771D6344006PQ/358?accountid=14513	The animals developed a resistant bacteria
281	Showdown looms over antibiotics; A federal proposal would sharply limit their use in animals raised for food.	http://search.proquest.com/latimes/docview/821895595/7310D771D6344006PQ/358?accountid=14514	he doesn't think antibiotic use in livestock production is the likely cause for an increase in antibiotic resistance in humans
282	MEDICINE; A CLOSER LOOK; Different sort of food additive; Antibiotic-resistant bacteria are found in meat. Evidence suggests a tie-in to animal farming methods.	http://search.proquest.com/latimes/docview/863111140/7310D771D6344006PQ/363?accountid=14512	It's really emerging quickly
283	An antibiotic wake-up call; Gonorrhea's growing resistance shows the need to fund the development of new drugs.	http://search.proquest.com/latimes/docview/921554032/7310D771D6344006PQ/370?accountid=14512	Resistant infections are emerging faster than new anti- biotics.
284	Antibiotics, animals and us	http://search.proquest.com/latimes/docview/993837463/7310D771D6344006PQ/373?accountid=14512	Doctors have been growing more cautious about prescribing antibiotics for humans because overuse fosters the development of drug-resistant bacteria
285	Too much of a good thing; Animals that aren't sick shouldn't be given antibiotics.	http://search.proquest.com/latimes/docview/1443945092/7310D771D6344006PQ/384?accountid=14512	we have it in our power to slow the emergence of drug-resistant bacteria
286	Chick-fil-A says it's shifting to antibiotic-free chicken	http://search.proquest.com/latimes/docview/1497324647/7310D771D6344006PQ/393?accountid=14512	none
287	USDA is sued over salmonella safeguards; It's not doing enough to prevent spread of antibiotic-resistant strains, lawsuit says.	http://search.proquest.com/latimes/docview/1529675210/7310D771D6344006PQ/397?accountid=14512	salmonella should be handled more strictly because of the rise of superbugs
288	USDA is sued over salmonella safeguards; It's not doing enough to prevent spread of antibiotic-resistant strains, lawsuit says.	http://search.proquest.com/latimes/docview/1529675210/7310D771D6344006PQ/397?accountid=14513	That same month the Food and Drug Administration moved to phase out many of the antibiotics used on animals to promote faster growth, a practice blamed for increasing resistance to antibiotics in people
289	SUPER GONORRHEA' RESISTS PENICILLIN, EXPERTS WARN	http://infoweb.newsbank.com/resources/doc/nb/news/0EB35A822EEEC049?p=AWNB	There has been a large increase in 1982
290	STUDY: DRUGS OFTEN USELESS AGAINST VIRUSES	http://infoweb.newsbank.com/resources/doc/nb/news/0EB4D8750046E1F0?p=AWNB	Such indiscriminate use of antibiotics has contributed to the emergence of drug-resistant bacteria
291	POULTRY DRUGS MAY BE BANNED	http://infoweb.newsbank.com/resources/doc/nb/news/0EB72F039BBB1438?p=AWNB	Resistance develops when antibiotics are overused
292	POULTRY DRUGS MAY BE BANNED	http://infoweb.newsbank.com/resources/doc/nb/news/0EB72F039BBB1438?p=AWNB	Illnesses caused by the resistant bacteria are increasing
293	STUDY REPORTS RISE IN BACTERIA'S RESISTANCE TO ANTIBIOTICS OVERUSE HELPS HARDEN GERMS	http://infoweb.newsbank.com/resources/doc/nb/news/0EB72F82533CDCC3?p=AWNB	University said that the rise of drug resistance ``should cause great concern
294	AMA WARNS OF DRUG MISUSE	http://infoweb.newsbank.com/resources/doc/nb/news/0EF3FB82CFEAA4A7?p=AWNB	The emergence of germs impervious to treatment has loomed as a major health threat
295	AMA WARNS OF DRUG MISUSE	http://infoweb.newsbank.com/resources/doc/nb/news/0EF3FB82CFEAA4A7?p=AWNB	The AMA also raises the specter of misuse contributing to the development of drug-resistant bacteria strains
296	DOCTORS' ANTIBIOTIC CHOICES QUESTIONED IN CASES OF URINARY INFECTION	http://infoweb.newsbank.com/resources/doc/nb/news/0F115CFCF9FC7CD9?p=AWNB	Some say, `Resistance [to trimethoprim-sulphamethoxazole] is increasing
297	ANTIBIOTIC-RESISTANT STREP THROAT CASES DOCUMENTED	http://infoweb.newsbank.com/resources/doc/nb/news/0F2FF836D8D36E23?p=AWNB	none
298	SEEKING A KILLER DRUG	http://infoweb.newsbank.com/resources/doc/nb/news/101D990BAF73814B?p=AWNB	organisms that face a situation 10 billion times, for example, have more chances of mutating into a more survivable entity than those that face a situation 10 million times
299	PROLIFERATION OF DANGEROUS BACTERIA ALARMS DOCTORS	http://infoweb.newsbank.com/resources/doc/nb/news/10579AB8DFB2E657?p=AWNB	none
300	ACTION LINE - HEALTHCARE	http://infoweb.newsbank.com/resources/doc/nb/news/1070AB4ACF10BDF8?p=AWNB	none
301	USDA SEEKS TO PUT A WRAP ON MICROBES	http://infoweb.newsbank.com/resources/doc/nb/news/115DFBDB1CFAB380?p=AWNB	no evidence of resistance to the oils has arisen
302	U.S. HEALTH: Resistant gonorrhea cases soar - The Center for Disease Control and Prevention reported an increase in antibiotic-resistant gonorrhea across the country -- and figures show Miami is hit hard.	http://infoweb.newsbank.com/resources/doc/nb/news/1187DDF7E2E59FD0?p=AWNB	the agency is working with state and local health departments, as well as the World Health Organization, to monitor the possible emergence of resistance to that class.
303	U.S. HEALTH: Resistant gonorrhea cases soar - The Center for Disease Control and Prevention reported an increase in antibiotic-resistant gonorrhea across the country -- and figures show Miami is hit hard.	http://infoweb.newsbank.com/resources/doc/nb/news/1187DDF7E2E59FD0?p=AWNB	gonorrhea tends to develop resistance to antibiotics quickly
304	U.S. HEALTH: Resistant gonorrhea cases soar - The Center for Disease Control and Prevention reported an increase in antibiotic-resistant gonorrhea across the country -- and figures show Miami is hit hard.	http://infoweb.newsbank.com/resources/doc/nb/news/1187DDF7E2E59FD0?p=AWNB	Prevention reported an increase in antibiotic-resistant gonorrhea across the country
305	U.S. HEALTH: Resistant gonorrhea cases soar - The Center for Disease Control and Prevention reported an increase in antibiotic-resistant gonorrhea across the country -- and figures show Miami is hit hard.	http://infoweb.newsbank.com/resources/doc/nb/news/1187DDF7E2E59FD0?p=AWNB	Gonorrhea's resistance was probably caused by the same problem that led to resistance of other organisms -- the casual use of antibiotics in the United States and overseas, which cause pathogens to mutate
306	ARE YOU STAPH SAVVY?	http://infoweb.newsbank.com/resources/doc/nb/news/11CE3AA5A103EF50?p=AWNB	The emergence of a resistant strain complicates the treatment in some cases
307	ARE YOU STAPH SAVVY?	http://infoweb.newsbank.com/resources/doc/nb/news/11CE3AA5A103EF50?p=AWNB	That’s how the development of multidrug resistance works
308	RESEARCH: Helping antibiotics retain effectiveness	http://infoweb.newsbank.com/resources/doc/nb/news/12541CA8E7A77958?p=AWNB	If it would prevent the emergence of further resistance or the spread of resistance, that would be helpful
309	RESEARCH: Helping antibiotics retain effectiveness	http://infoweb.newsbank.com/resources/doc/nb/news/12541CA8E7A77958?p=AWNB	two Northwestern University researchers may have found a way to prevent or slow the development of drug resistance
310	ENVIRONMENT Beach may hold harmful bacteria	http://infoweb.newsbank.com/resources/doc/nb/news/1268C053E0AEA360?p=AWNB	MRSA, or Methicillin-resistant staphylococcus aureus, is a form of the bacteria that is more dangerous because it has developed resistance to most antibiotics
311	Antibiotics overuse creates lethal drug-resistant bugs, say experts - Overuse of antibiotics by private doctors and hospitals is causing lethal diseases to mutate and become resistant to the drugs, say experts.	http://infoweb.newsbank.com/resources/doc/nb/news/13B93D44364B5E48?p=AWNB	Such programs aim “to promote the appropriate use of antimicrobials by selecting the appropriate agent, dose, duration and method of administration to improve patient outcomes while minimizing toxicity and the emergence of antimicrobial resistance,” said Dr. Kavita Tirvedi of the California Department of Health.
312	Antibiotics overuse creates lethal drug-resistant bugs, say experts - Overuse of antibiotics by private doctors and hospitals is causing lethal diseases to mutate and become resistant to the drugs, say experts.	http://infoweb.newsbank.com/resources/doc/nb/news/13B93D44364B5E48?p=AWNB	Serious infections like Klebsiella, a bacteria that causes ventilator-dependent pneumonia, wound infections and meningitis and has recently developed resistance to most of the antibiotics used to fight it
313	Antibiotics overuse creates lethal drug-resistant bugs, say experts - Overuse of antibiotics by private doctors and hospitals is causing lethal diseases to mutate and become resistant to the drugs, say experts.	http://infoweb.newsbank.com/resources/doc/nb/news/13B93D44364B5E48?p=AWNB	So the University of Miami School of Medicine on Saturday held a day-long symposium on overuse of antibiotics and the increasing resistance that sometimes-lethal bacteria are building against them.
314	Antibiotics overuse creates lethal drug-resistant bugs, say experts - Overuse of antibiotics by private doctors and hospitals is causing lethal diseases to mutate and become resistant to the drugs, say experts.	http://infoweb.newsbank.com/resources/doc/nb/news/13B93D44364B5E48?p=AWNB	It’s a worldwide problem, with African countries encountering mutated, drug-resistant forms of malaria and other diseases
315	New guidelines call for limiting antibiotics for ear infections	http://infoweb.newsbank.com/resources/doc/nb/news/14F53FE82CC2D8D8?p=AWNB	none
316	Emerging diseases may be unstoppable, researchers warn	http://infoweb.newsbank.com/resources/doc/nb/news/0EFD65F7A0ADF337?p=AWNB	What is happening is simple: Bacteria, viruses and parasites are evolving into new, drug-resistant forms.
317	Emerging diseases may be unstoppable, researchers warn	http://infoweb.newsbank.com/resources/doc/nb/news/0EFD65F7A0ADF337?p=AWNB	Yet that is the worst strategy, he said, because it gives the bacteria an opportunity to develop resistance to that antibiotic.
318	Emerging diseases may be unstoppable, researchers warn	http://infoweb.newsbank.com/resources/doc/nb/news/0EFD65F7A0ADF337?p=AWNB	But given that most antibiotics are sold over the counter in Third World countries, there is no way to stop the emergence of resistant diseases, he said.
319	Doctors' group targets overuse of antibiotics - The Minnesota Medical Association is calling for an awareness campaign to combat "superbug" resistance.	http://infoweb.newsbank.com/resources/doc/nb/news/0EFCD00848CF48BE?p=AWNB	none
320	Prescription for the psyche - In place of antibiotics, which help to breed bacterial "superbugs," some patients with viral colds and coughs are being given comfort kits.	http://infoweb.newsbank.com/resources/doc/nb/news/0EFCD12FCECF1827?p=AWNB	Some types of bacterial infections occurring here are increasingly resistant to firstline antibiotics, he said.
321	Journal urges antibiotic limits - Research links livestock intake with superbugs in meat	http://infoweb.newsbank.com/resources/doc/nb/news/0EFD146EC7E5135E?p=AWNB	Dr. Jeff Bender, professor of veterinary public health at the University of Minnesota, said many factors affect whether bacteria cause illness or develop drug resistance, including environment and type of animal.
322	Change in food rules will be felt down on the farms - Concern about human resistance has led to a push to limit antibiotic use in livestock. New FDA guidelines have the attention of Minnesota farmers.	http://infoweb.newsbank.com/resources/doc/nb/news/13DF39B4E69AB890?p=AWNB	none
323	Cargill to cut back on use of antibiotics - The company is phasing out the growth-promoting drugs in its turkeys amid concern about their effects on humans.	http://infoweb.newsbank.com/resources/doc/nb/news/14F70D70878CF7D8?p=AWNB	none
324	DREADED GERM UPS ANTE INFECTION POTENTIALLY UNBEATABLE	http://www.lexisnexis.com/lnacui2api/api/version1/getDocCui?lni=3SCH-G2S0-0093-D42J&csi=151550&hl=t&hv=t&hnsd=f&hns=t&hgn=t&oc=00240&perma=true	Just two years ago, New York City experienced a dramatic increase in another bacteria drug-resistant mutant strains of streptococcus pneumonia, or flesh-eating bacteria.
325	RESEARCHERS URGE WAR ON DEADLY STAPH	http://www.lexisnexis.com/lnacui2api/api/version1/getDocCui?lni=3SCH-G130-0093-D2BY&csi=151550&hl=t&hv=t&hnsd=f&hns=t&hgn=t&oc=00240&perma=true	none
326	MDS GET EARFUL ABOUT ANTIBIOTICS FOR BABIES	http://www.lexisnexis.com/lnacui2api/api/version1/getDocCui?lni=3S9D-9RX0-0093-D3G6&csi=151550&hl=t&hv=t&hnsd=f&hns=t&hgn=t&oc=00240&perma=true	none
327	PATH OF GREAT RESISTANCE Overuse of antibiotics strengthens bacteria and weakens the immune system - a d eadly combination	http://www.lexisnexis.com/lnacui2api/api/version1/getDocCui?lni=44G8-6BB0-00T0-G20C&csi=151550&hl=t&hv=t&hnsd=f&hns=t&hgn=t&oc=00240&perma=true	They evolve in response to the drugs and, in time, morph into new forms that can escape a drug's reach.
328	PATH OF GREAT RESISTANCE Overuse of antibiotics strengthens bacteria and weakens the immune system - a d eadly combination	http://www.lexisnexis.com/lnacui2api/api/version1/getDocCui?lni=44G8-6BB0-00T0-G20C&csi=151550&hl=t&hv=t&hnsd=f&hns=t&hgn=t&oc=00240&perma=true	"If you are put on [an antibiotic], and the germ is not there, there is no way for anthrax to develop a resistance to it," explains Dr. Tamar Barlam of the Antibiotic Resistance Project for the Center for Science in the Public Interest.
329	PATH OF GREAT RESISTANCE Overuse of antibiotics strengthens bacteria and weakens the immune system - a d eadly combination	http://www.lexisnexis.com/lnacui2api/api/version1/getDocCui?lni=44G8-6BB0-00T0-G20C&csi=151550&hl=t&hv=t&hnsd=f&hns=t&hgn=t&oc=00240&perma=true	"The germs are trying to survive and will select mutants and reproduce every 15 to 20 minutes," Farber says.
330	DOCTORS CALL FOR CONTROLS ON USE OF ANTIBIOTICS	http://search.proquest.com/nytimes/docview/424179130/fulltext/5E897B05662648B2PQ/6?accountid=14512	none
331	F.D.A. PROPOSAL ON MEAT SAFETY DRAWS CRITICISM	http://search.proquest.com/nytimes/docview/424657052/4FD9521A67C94E74PQ/18?accountid=14512	none
332	Common Bacteria Said to Be Turning Untreatable	http://search.proquest.com/nytimes/docview/109295619/fulltextPDF?accountid=14512	Many other strains are evolving into strains that are untreatable
333	The Squandering of a Panacea It's hard to read without wonder about the long series of unlikely events that enabled Alexander Fleming to discover penicillin. The folly, greed and neglect with which the priceless gift of antibiotics is now being squandered command almost equal awe.: [Editorial]	http://search.proquest.com/nytimes/docview/425191456/4FD9521A67C94E74PQ/24?accountid=14512	none
334	Scientists Tell of Promise Seen In a New Class of Antibiotics	http://search.proquest.com/nytimes/docview/110745067/fulltextPDF?accountid=14512	Infections caused by bacteria have become an increasingly important problem, in part because they have developed resistance to antibiotics
335	Scientists Tell of Promise Seen In a New Class of Antibiotics	http://search.proquest.com/nytimes/docview/110745067/fulltextPDF?accountid=14513	With the emergence of such resistant organisms, scientists have striven to discover new antibiotics
336	THE DOCTOR'S WORLD; Staying Ahead of Microbes: New Progress	http://search.proquest.com/nytimes/docview/426569580/82258D084A804B66PQ/41?accountid=14512	But continued success depends on keeping ahead of the microbes that develop resistance.
337	After Causing Worry in the East, A Germ Has Surfaced in the West: A death in California is traced to a strain that resists drugs.	http://search.proquest.com/nytimes/docview/109450162/fulltextPDF?accountid=14512	The organism has also developed a resistance to most antibiotics
338	Doctors Tell of International Resurgence in a Variety of InfectiousDiseases	http://search.proquest.com/nytimes/docview/430470899/9828B12898AA4299PQ/137?accountid=14512	Instead, in the last decade new infections like that of the AIDS virus, H.I.V., suddenly began killing hundreds of thousands of people, older diseases like tuberculosis returned, and bacteria began evolving to defy treatment.
339	Doctors Tell of International Resurgence in a Variety of InfectiousDiseases	http://search.proquest.com/nytimes/docview/430470899/9828B12898AA4299PQ/137?accountid=14513	In Columbus, Ohio, antibiotic resistance is rising among patients with a dangerous form of bacterial pneumonia that spreads to the bloodstream,
340	New Strain Of Staph Is Resistant	http://search.proquest.com/nytimes/docview/109757814/fulltextPDF?accountid=14512	none
341	Antibiotic Use May Not Help In Some Cases	http://search.proquest.com/nytimes/docview/109752209/fulltextPDF?accountid=14512	Such indiscriminate use of antibiotics has contributed to the emergence of drug-resistant bacteria
342	Sharp Rise Is Reported In Resistant Salmonella	http://search.proquest.com/nytimes/docview/109953808/fulltextPDF?accountid=14512	The risk of being infected by drug-resistant salmonella bacteria has risen greatly in recent years
343	Sharp Rise Is Reported In Resistant Salmonella	http://search.proquest.com/nytimes/docview/109953808/fulltextPDF?accountid=14513	Laboratories around the nation are finding a greatly increased incidence of resistant salmonella
344	Superbugs	http://search.proquest.com/nytimes/docview/215497650/5DF3D6F862B94ED1PQ/196?accountid=14512	TO TRACE THE EVOLUTION OF THE NEW superbugs, experts inevitably look back to the introduction of penicillin in 1943.
345	Superbugs	http://search.proquest.com/nytimes/docview/215497650/5DF3D6F862B94ED1PQ/196?accountid=14513	In a report released in May, the Institute of Medicine complained that no nation, including the United States, has an adequate system for monitoring the emergence of these drug-resistant germs.
346	Superbugs	http://search.proquest.com/nytimes/docview/215497650/5DF3D6F862B94ED1PQ/196?accountid=14514	As resistance to each antibiotic continued to develop in the mid-1980's, infectious disease experts have been waiting and watching for the last domino to fall: the emergence of staph strains that are resistant to vancomycin.
347	Superbugs	http://search.proquest.com/nytimes/docview/215497650/5DF3D6F862B94ED1PQ/196?accountid=14515	in a 1945 interview with The New York Times, Fleming warned that misuse of penicillin could lead to the propagation of mutant forms of bacteria that would resist the new miracle drug.
348	Experts Warn Lawmakers of Wave of 'Superbugs'	http://search.proquest.com/nytimes/docview/109851568/fulltextPDF?accountid=14512	More and more bacteria will emerge that can resist all known drugs
349	Experts Warn Lawmakers of Wave of 'Superbugs'	http://search.proquest.com/nytimes/docview/109851568/fulltextPDF?accountid=14513	A doctor should no longer prescribe an antibiotic thinking that it can do no harm, he said, because the more often bacteria are exposed to a drug, the more likely they are to develeop resistance
350	F.D.A. Is Urged to Limit Antibiotics for Animals	http://search.proquest.com/nytimes/docview/110026523/fulltextPDF?accountid=14512	The Government would test today's level of drug resistance among food-borne bacteria and then set limits on how much the resistance could increase before an animal antibiotic would be restricted
351	When Antibiotics Are Used Too Often: [Interview]	http://search.proquest.com/nytimes/docview/110047089/fulltextPDF?accountid=14512	These children are at greater risk of developing bacteria that are resistant to all antibiotics
352	Strain of Bacteria Worries Scientists After Children Die: After 4 Deaths, Scientists Fear Threat From Germ Strain	http://search.proquest.com/nytimes/docview/109954384/fulltextPDF?accountid=14512	Staph bugs did not escape from the hospital, but rather mutated in the environment
353	Drug Agency Approves Antibiotic	http://search.proquest.com/nytimes/docview/110012114/fulltextPDF?accountid=14512	With drug-resistant bacteria on the rise…
354	Drug Agency Approves Antibiotic	http://search.proquest.com/nytimes/docview/110012114/fulltextPDF?accountid=14513	Resistance to Synercid could develop as well
355	Drug Agency Approves Antibiotic	http://search.proquest.com/nytimes/docview/110012114/fulltextPDF?accountid=14514	But the drug could be a lifesaver for some of the 16000 hospital patients who become infected each year with a resistant strain of the enterococcus bacterium, enterococcus faecium, that has emerged over the last decade
356	Ear Infections Getting Tougher to Treat	http://search.proquest.com/nytimes/docview/110144675/fulltextPDF?accountid=14512	none
357	Antibiotic Misuse Turns Treatable to Incurable	http://search.proquest.com/nytimes/docview/91377476/fulltextPDF?accountid=14512	Overuse of drugs in wealthy nations combined with underuse in poor ones speeds the natural process of bacteria evolving to survive
358	Antibiotic Misuse Turns Treatable to Incurable	http://search.proquest.com/nytimes/docview/91377476/fulltextPDF?accountid=14513	That use results in the development of drug-resistant germs in or near livestock
359	How Germ-Phobia Can Lead to Illness	http://search.proquest.com/nytimes/docview/431478410/66332E4F6C4440CAPQ/258?accountid=14512	Furthermore, these surviving bacteria may evolve resistance to both antimicrobials and antibiotics that could be transferred to dangerous pathogens.
360	How Germ-Phobia Can Lead to Illness	http://search.proquest.com/nytimes/docview/431478410/66332E4F6C4440CAPQ/258?accountid=14513	Last week, because of the growing concern about the emergence of antibiotic-resistant germs, the American Medical Association urged the government to step up regulation of antibacterial soaps, lotions and other household products.
361	How Germ-Phobia Can Lead to Illness	http://search.proquest.com/nytimes/docview/431478410/66332E4F6C4440CAPQ/258?accountid=14514	Laura McMurry and colleagues in Dr. Levy's laboratory have shown that while triclosan wipes out the most sensitive bacteria, it also gives rise to bacteria that resist its action by pumping the chemical out of their cells.
362	More Antibiotics Ineffective Against Gonorrhea	http://search.proquest.com/nytimes/docview/91373521/fulltextPDF?accountid=14512	The new findings continue a long term trend of increasing difficulty in treating gonorrhea because of resistance to antibiotics
363	A Regimen for Resistance	http://search.proquest.com/nytimes/docview/431857285/66332E4F6C4440CAPQ/290?accountid=14512	In addition, their unwarranted use helps drug-resistant bacteria to develop, the authors said.
364	Resistance Builds To Cipro, Study Says	http://search.proquest.com/nytimes/docview/92120385/fulltextPDF?accountid=14512	Two Taiwan hospitals found that a powerful strain of salmonella developed a resistance to the antibiotic Cipro
365	Outbreak of Drug-Resistant Strep Bacteria	http://search.proquest.com/nytimes/docview/92290406/fulltextPDF?accountid=14512	research has linked such vast use to a rise of the resistant bacteria
366	Outbreak of Drug-Resistant Strep Bacteria	http://search.proquest.com/nytimes/docview/92290406/fulltextPDF?accountid=14513	An increase in the use of macrolides correlated with an increase in macrolide-resistant Group A streptococci
367	New Resistant Gonorrhea Migrating to Mainland U.S.	http://search.proquest.com/nytimes/docview/92361023/fulltextPDF?accountid=14512	none
368	Bacteria Run Wild, Defying Antibiotics	http://search.proquest.com/nytimes/docview/92783811/fulltextPDF?accountid=14512	Staph infections are such a common problem that the emergence of infections resistant to common antibiotics has important health implications
369	Bacteria Run Wild, Defying Antibiotics	http://search.proquest.com/nytimes/docview/92783811/fulltextPDF?accountid=14513	The prevalence of the resistant staph in LA has increased enormously
370	Bacteria Run Wild, Defying Antibiotics	http://search.proquest.com/nytimes/docview/92783811/fulltextPDF?accountid=14514	Antbiotic-resistant bacteria often develop when people take many antibiotics
371	Extreme Tuberculosis	http://search.proquest.com/nytimes/docview/93060000/fulltextPDF?accountid=14512	None
372	Have Germs, Will Travel	http://search.proquest.com/nytimes/docview/848070798/fulltextPDF?accountid=14512	And we need to support a world-wide effort to prevent TB bacteria from developing further drug-resistance
373	TB Tests Show Promise, but Flaws Limit Progress	http://search.proquest.com/nytimes/docview/433628701/14101F014CDC446BPQ/458?accountid=14512	What alarms health officials is the potential for outbreaks of MDR to evolve into large XDR ones, creating the specter of an uncontrollable health menace.
374	TB Tests Show Promise, but Flaws Limit Progress	http://search.proquest.com/nytimes/docview/433628701/14101F014CDC446BPQ/458?accountid=14513	Tuberculosis resistance develops when drugs are misused or mismanaged
375	Pathogens In Our Pork: [Op-Ed]	http://search.proquest.com/nytimes/docview/1030596671/fulltextPDF?accountid=14512	and that's one reason we're seeing the rise of pathogens that defy antibiotics
376	Pathogens In Our Pork: [Op-Ed]	http://search.proquest.com/nytimes/docview/1030596671/fulltextPDF?accountid=14513	A new strain called ST398 is emerging and seems to find a reservoir in modern hog farms
377	Deadly Germs Largely Ignored By Drug Firms: [Business/Financial Desk]	http://search.proquest.com/nytimes/docview/434287398/fulltextPDF/32F7BE5F26E14735PQ/519?accountid=14512	none
378	Antibiotics and Agriculture: [Editorial]	http://search.proquest.com/nytimes/docview/527781145/fulltext/32F7BE5F26E14735PQ/529?accountid=14512	But overuse of antibiotics in farm animals is also thought to be stimulating the emergence of resistant bacterial strains that can infect humans or pass their resistance to other germs that infect humans.
379	We Are What We Eat: [Editorial]	http://search.proquest.com/nytimes/docview/751954229/fulltext/B356768857E6430CPQ/535?accountid=14512	The result is nearly the same as if we were eating the antibiotics ourselves: an increase in antibiotic resistance in humans and the emergence of drug-resistant microbes.
380	Looking for a Superbug Killer: [Business/Financial Desk]	http://search.proquest.com/nytimes/docview/762545756/fulltext/B356768857E6430CPQ/537?accountid=14512	Another factor is that new antibiotics are likely to be used only sparingly at first, to stave off the emergence of resistance.
381	Looking for a Superbug Killer: [Business/Financial Desk]	http://search.proquest.com/nytimes/docview/762545756/fulltext/B356768857E6430CPQ/537?accountid=14513	For example, scientists have become alarmed by the spread from India of a newly discovered mutation called NDM-1, which renders certain germs like E. coli invulnerable to nearly all modern antibiotics.
382	Citing Drug Resistance, U.S. Restricts More Antibiotics for Livestock: [National Desk]	http://search.proquest.com/nytimes/docview/913659516/fulltext/2D0B1B1F500D41C9PQ/565?accountid=14512	The drugs' use in agriculture has, according to many microbiologists, led to the development of bacteria that are resistant to their effects, a development that many doctors say has cost thousands of lives.
383	Citing Drug Resistance, U.S. Restricts More Antibiotics for Livestock: [National Desk]	http://search.proquest.com/nytimes/docview/913659516/fulltext/2D0B1B1F500D41C9PQ/565?accountid=14513	"We are staring at a massive public health threat in the rise of antibiotic-resistant superbugs," she said.
384	Let's Gang Up on Killer Bugs: [Op-Ed]	http://search.proquest.com/nytimes/docview/1223786019/fulltext/2D0B1B1F500D41C9PQ/581?accountid=14512	it quickens the pace at which bacteria develop resistance
385	Let's Gang Up on Killer Bugs: [Op-Ed]	http://search.proquest.com/nytimes/docview/1223786019/fulltext/2D0B1B1F500D41C9PQ/581?accountid=14513	Large numbers of independently mutating bacteria test adaptations to group problems, like how to survive antibiotics.
386	Hazards: Pneumonia Strain Has Spread: [Science Desk]	http://search.proquest.com/nytimes/docview/1283939787/fulltext/2D0B1B1F500D41C9PQ/586?accountid=14512	none
387	Antibiotic-Resistant Infections Lead to 23,000 Deaths a Year, C.D.C. Finds: [National Desk]	http://search.proquest.com/nytimes/docview/1432932828/BD1060669D1248AAPQ/600?accountid=14512	http://search.proquest.com/nytimes/docview/1432932828/BD1060669D1248AAPQ/600?accountid=14512
388	F.D.A. Restricts Antibiotics Use For Livestock: [National Desk]	http://search.proquest.com/nytimes/docview/1467049414/BD1060669D1248AAPQ/611?accountid=14512	Health officials have warned since the 1970s that overuse of antibiotics in animals was leading to the development of infections resistant to treatment in humans
389	The Rise of Antibiotic Resistance: [Editorial]	http://search.proquest.com/nytimes/docview/1522996648/BD1060669D1248AAPQ/624?accountid=14512	Still, it is clear that major resistance problems have already developed,
390	The Rise of Antibiotic Resistance: [Editorial]	http://search.proquest.com/nytimes/docview/1522996648/BD1060669D1248AAPQ/624?accountid=14513	The Rise of Antibiotic Resistance
391	Taking a Health Hazard Home: [Science Desk]	http://search.proquest.com/nytimes/docview/1562060378/BD1060669D1248AAPQ/635?accountid=14512	none
392	The Danger of Going Off Course: [Question]	http://search.proquest.com/nytimes/docview/1639252157/BD1060669D1248AAPQ/646?accountid=14512	none
393	EXPERTS SAY ANTIBIOTICS TURMOIL WAS CULTIVATED BY SHUNNING OF RESEARCH	http://infoweb.newsbank.com/resources/doc/nb/news/1224870428DC6748?p=AWNB	If the microbiology community could so easily have predicted the re- emergence of contagious diseases, why is society so shocked and unprepared?
394	EXPERTS SAY ANTIBIOTICS TURMOIL WAS CULTIVATED BY SHUNNING OF RESEARCH	http://infoweb.newsbank.com/resources/doc/nb/news/1224870428DC6748?p=AWNB	the bacteria causing the infections are being given a far greater chance to mutate or pass along antibiotic-defeating behavior to offspring
395	INFECTIOUS STRAINS	http://infoweb.newsbank.com/resources/doc/nb/news/1224CB72C1445B28?p=AWNB	researchers say microbes have been evolving and mutating to survive the attacks - and the more often the drugs are used, the greater the chance that they won't work next time.
396	New blemish on use of antibiotics for acne	http://infoweb.newsbank.com/resources/doc/nb/news/0EFDAA83737657FA?p=AWNB	Several recent studies show that acne-causing bacteria, Propionibacterium acnes or P. acnes have developed strains that resist both topical and oral antibiotics.
397	Experts say stubborn staph case is isolated and under control	http://infoweb.newsbank.com/resources/doc/nb/news/0EFDA89D6B1FC188?p=AWNB	Bacteria mutation is a natural phenomenon that is dramatically speeded up by the overzealous use of antibiotics that destroy all but the strongest strains.
398	Microbes may soon win the war against humans	http://infoweb.newsbank.com/resources/doc/nb/news/0EFDA44275ABCFED?p=AWNB	Resistance arises because bacteria, like all organisms, vary slightly in genetic makeup and, hence, in the molecular characteristics that antibiotics act on
399	Microbes may soon win the war against humans	http://infoweb.newsbank.com/resources/doc/nb/news/0EFDA44275ABCFED?p=AWNB	"Clearly, the rate at which resistant organisms develop is not solely a function of the use of (antibiotics) in humans"
400	New strains of disease are plaguing medical science	http://infoweb.newsbank.com/resources/doc/nb/news/0EFD4BDAD4C15AD5?p=AWNB	It's frightening to consider the rise of super bacteria that cannot be arrested by even the most powerful antibiotics, the wonder drugs that have defeated legions of scourges.
401	New strains of disease are plaguing medical science	http://infoweb.newsbank.com/resources/doc/nb/news/0EFD4BDAD4C15AD5?p=AWNB	Now the emergence of virulent new strains of bacteria is making disease more difficult to conquer.
402	Bacteria growing resistant to Cipro	http://infoweb.newsbank.com/resources/doc/nb/news/0F94FA0D93973324?p=AWNB	Resistance can develop when a drug is used repeatedly against the same germ
403	Bacteria growing resistant to Cipro	http://infoweb.newsbank.com/resources/doc/nb/news/0F94FA0D93973324?p=AWNB	The increasing resistance found in the study came at a time when doctors increasingly prescribed Cipro and similar drug
404	Bacteria growing resistant to Cipro	http://infoweb.newsbank.com/resources/doc/nb/news/0F94FA0D93973324?p=AWNB	Resistance can develop when a drug is used repeatedly against the same germ, which may eventually mutate to outwit the drug.
405	From savior to assassin How killer germs have defeated our last antibiotic	http://infoweb.newsbank.com/resources/doc/nb/news/0FF53726CC2944B3?p=AWNB	More than 20 years ago, scientists warned the nation's health care, governmental and pharmaceutical communities that antibiotic-resistant infections were on the rise.
406	From savior to assassin How killer germs have defeated our last antibiotic	http://infoweb.newsbank.com/resources/doc/nb/news/0FF53726CC2944B3?p=AWNB	The first signs that a public health problem might be brewing appeared in the 1960s with the emergence of methicillin-resistant staph.
407	From savior to assassin How killer germs have defeated our last antibiotic	http://infoweb.newsbank.com/resources/doc/nb/news/0FF53726CC2944B3?p=AWNB	The development of resistance wasn't just probable. It was predetermined
408	From savior to assassin How killer germs have defeated our last antibiotic	http://infoweb.newsbank.com/resources/doc/nb/news/0FF53726CC2944B3?p=AWNB	dangerous when they enter the bloodstream or when they mutate and become strong enough to override a person's immune system.
409	New weapon to fight 'super-bugs' - FDA approves antibiotic for use against drug-resistant infections	http://infoweb.newsbank.com/resources/doc/nb/news/10ACC53B11F3BAC3?p=AWNB	None
410	Digging up genetic clues to take on super-germs	http://infoweb.newsbank.com/resources/doc/nb/news/10F44DDD202416A0?p=AWNB	But their overuse and misuse have helped fuel the rise of drug-resistant "superbugs."
411	Digging up genetic clues to take on super-germs	http://infoweb.newsbank.com/resources/doc/nb/news/10F44DDD202416A0?p=AWNB	The findings, published in the journal Science, could help explain why bacteria so quickly develop resistance to antibiotics, and why drug companies must constantly develop new ones.
412	Study finds infections growing from regular and 'super' staph	http://infoweb.newsbank.com/resources/doc/nb/news/11D418469FE690A0?p=AWNB	MRSA is more difficult to treat than other infections because it has developed resistance to most commonly used antibiotics.
413	As 'superbug' rises, new antibiotics fall	http://infoweb.newsbank.com/resources/doc/nb/news/11CB8AAFB20EC608?p=AWNB	As 'superbug' rises, new antibiotics fall
414	As 'superbug' rises, new antibiotics fall	http://infoweb.newsbank.com/resources/doc/nb/news/11CB8AAFB20EC608?p=AWNB	The inevitable development of resistant strains of bacteria also tends to limit the long-term use of most antibiotics.
415	As 'superbug' rises, new antibiotics fall	http://infoweb.newsbank.com/resources/doc/nb/news/11CB8AAFB20EC608?p=AWNB	As concerns have grown about the increase in drug-resistant and potentially deadly bacterial infections, the pharmaceutical pipeline for new antibiotics has been drying up.
416	Nature has way to kill super bugs - Rise of antibiotic-resistant viruses revives study of bacteria eaters	http://infoweb.newsbank.com/resources/doc/nb/news/11E2968623C4E7F8?p=AWNB	"Phage research in more recent years has revealed not only their abundance and diversity of form, but also their dramatic impact on the ecology of our planet, their influence on the evolution of microbial populations,
417	Nature has way to kill super bugs - Rise of antibiotic-resistant viruses revives study of bacteria eaters	http://infoweb.newsbank.com/resources/doc/nb/news/11E2968623C4E7F8?p=AWNB	Nature has way to kill super bugs - Rise of antibiotic-resistant viruses revives study of bacteria eaters
418	Free antibiotics may do more damage than good	http://infoweb.newsbank.com/resources/doc/nb/news/1262CC5385112A38?p=AWNB	Medical societies and policy makers are concerned about increasing treatment failures associated with the rapid rise in antibiotic-resistant su- perbugs.
419	Free antibiotics may do more damage than good	http://infoweb.newsbank.com/resources/doc/nb/news/1262CC5385112A38?p=AWNB	however, antibiotics demand special care because each individual antibiotic use can lead to increased drug resistance in the community.
420	Follow-up antibiotic may help to eliminate repeated infections - KID CARE	http://infoweb.newsbank.com/resources/doc/nb/news/1421B774212E33A0?p=AWNB	Many serious infections in children arise from these germs and the development of vaccines has greatly reduced their incidence.
421	Follow-up antibiotic may help to eliminate repeated infections - KID CARE	http://infoweb.newsbank.com/resources/doc/nb/news/1421B774212E33A0?p=AWNB	Fortunately, Group A strep is still sensitive to penicillin and has not developed resistance.
422	The War Against Superbugs - Health care facilities are getting smarter in fighting multidrug-resistant infections	http://infoweb.newsbank.com/resources/doc/nb/news/14CF70075B344B60?p=AWNB	superbugs, scrappy microorganisms that have had millions of generations to evolve into efficient killers.
423	The War Against Superbugs - Health care facilities are getting smarter in fighting multidrug-resistant infections	http://infoweb.newsbank.com/resources/doc/nb/news/14CF70075B344B60?p=AWNB	As long as there are sick people in hospitals, there will be an increased risk of transmitting antibiotic-resistant organisms.
424	ANTIBIOTICS ARE OVERPRESCRIBED	http://infoweb.newsbank.com/resources/doc/nb/news/151992DEB7D68670?p=AWNB	The widespread and inappropriate use of antibiotics is a major cause of the emergence of bacterial resistance. Too often antibiotics are being prescribed for viral infections, such as the common cold.
425	ANTIBIOTICS ARE OVERPRESCRIBED	http://infoweb.newsbank.com/resources/doc/nb/news/151992DEB7D68670?p=AWNB	Otherwise, there can be a recurrence of the infection or surviving bacteria may develop resistance to the antibiotic.
426	MERCK SPENDS $8.4B ON CUBIST FOR GAINS IN ‘SUPERBUG' TREATMENTS	http://infoweb.newsbank.com/resources/doc/nb/news/1521CF7A699F0780?p=AWNB	Experts say overuse and misuse of the drugs by physicians has contributed to the rise of these so-called superbugs
427	DRUG-RESISTANT BACTERIA WINNING A HEALTH BATTLE	http://infoweb.newsbank.com/resources/doc/nb/news/0EB2A12251BA7FA9?p=AWNB	Many health experts believe the misuse of antibiotics in people and animal feed are contributing to the rise of drug-resistant bacterial strains.
428	DRUG-RESISTANT BACTERIA WINNING A HEALTH BATTLE	http://infoweb.newsbank.com/resources/doc/nb/news/0EB2A12251BA7FA9?p=AWNB	"We are also seeing the emergence of multiresistance bugs - bacteria that are resistant to a number of different drugs," he said.
429	DRUG-RESISTANT BACTERIA WINNING A HEALTH BATTLE	http://infoweb.newsbank.com/resources/doc/nb/news/0EB2A12251BA7FA9?p=AWNB	bacteria, which cause diarrhea, pneumonia, ear infections, tuberculosis, gonorrhea and many other diseases, have developed resistance to medicine's arsenal of antibiotic drugs at an alarming rate.
430	DRUG-RESISTANT BACTERIA WINNING A HEALTH BATTLE	http://infoweb.newsbank.com/resources/doc/nb/news/0EB2A12251BA7FA9?p=AWNB	The use of antibiotics in animal feed may also be playing a role in the increase in drug-resistant strains that can cause illness in people.
431	AREA CASE HIGHLIGHTS TOUGH BACTERIA STRAIN	http://infoweb.newsbank.com/resources/doc/nb/news/0EB32EF94B7D7403?p=AWNB	But because of overuse, more and more bacteria are developing resistance to vancomycin - one step away from immunity.
432	TO COMBAT RESISTANCE, SCIENTISTS URGE MORE PRUDENT USE OF ANTIBIOTICS	http://infoweb.newsbank.com/resources/doc/nb/news/0EB32FF9579548C8?p=AWNB	A growing number of germs are developing resistance to the antibiotic of last resort, vancomycin.
433	TO COMBAT RESISTANCE, SCIENTISTS URGE MORE PRUDENT USE OF ANTIBIOTICS	http://infoweb.newsbank.com/resources/doc/nb/news/0EB32FF9579548C8?p=AWNB	Scientists issued a new call yesterday for more prudent use of antibiotics, warning that overprescribing for every sniffle and ear infection is fast helping germs mutate
434	NEW CONCERN SEEN ON ANTIBACTERIALS \ THE AGENT IN MANY SOAPS AND LOTIONS COULD BE MAKING GERMS MORE DRUG-RESISTANT, A STUDY SAID.	http://infoweb.newsbank.com/resources/doc/nb/news/0EB3305175C30C8E?p=AWNB	TB, which kills three million people annually worldwide, became more difficult to cure in the last decade with the emergence of several bacterial strains that are resistant to conventional antibiotics.
435	NEW CONCERN SEEN ON ANTIBACTERIALS \ THE AGENT IN MANY SOAPS AND LOTIONS COULD BE MAKING GERMS MORE DRUG-RESISTANT, A STUDY SAID.	http://infoweb.newsbank.com/resources/doc/nb/news/0EB3305175C30C8E?p=AWNB	But now that they have determined that the compound works on a specific genetic site, scientists said the potential for developing resistance was much higher.
436	NEW CONCERN SEEN ON ANTIBACTERIALS \ THE AGENT IN MANY SOAPS AND LOTIONS COULD BE MAKING GERMS MORE DRUG-RESISTANT, A STUDY SAID.	http://infoweb.newsbank.com/resources/doc/nb/news/0EB3305175C30C8E?p=AWNB	Germs can genetically mutate into super-strains if they are repeatedly exposed to, but not killed by, antibiotic drugs and antibacterial agents.
437	RHONE-POULENC WINS APPROVAL FOR ANTIBIOTIC THE FDA HAS AUTHORIZED THE SALE OF SYNERCID FOR SOME RESISTANT INFECTIONS.	http://infoweb.newsbank.com/resources/doc/nb/news/0EB5CEBC6FB6619B?p=AWNB	"There's no reason to think at this stage that Synercid will be different from other antibiotics and not give rise to resistance after widespread use,"
438	RHONE-POULENC WINS APPROVAL FOR ANTIBIOTIC THE FDA HAS AUTHORIZED THE SALE OF SYNERCID FOR SOME RESISTANT INFECTIONS.	http://infoweb.newsbank.com/resources/doc/nb/news/0EB5CEBC6FB6619B?p=AWNB	The unit, Rhone-Poulenc Rorer Inc., noted that while Synercid was active against certain resistant strains of Enterococcus, several cases of emerging resistance occurred in the trials.
439	RHONE-POULENC WINS APPROVAL FOR ANTIBIOTIC THE FDA HAS AUTHORIZED THE SALE OF SYNERCID FOR SOME RESISTANT INFECTIONS.	http://infoweb.newsbank.com/resources/doc/nb/news/0EB5CEBC6FB6619B?p=AWNB	Among the uses of Synercid are treatment of bloodstream infections caused by the bacteria Enterococcus faecium, which are increasingly resistant to existing antibiotics.
440	WASHOUTS IN THE WAR ON GERMS? WHILE ANTIBACTERIAL PRODUCTS ARE POPULAR, STUDIES INDICATE THAT THEY DO NO BETTER THAN SOAP AND WATER. SOME SCIENTISTS EVEN WORRY THAT THE PRODUCTS MAY DO MORE HARM THAN GOOD.	http://infoweb.newsbank.com/resources/doc/nb/news/0EB735FBA46790F4?p=AWNB	Some of these products may eventually make us sicker by giving rise to bacteria that are resistant to them, said Levy, who has studied antibacterials.
441	WASHOUTS IN THE WAR ON GERMS? WHILE ANTIBACTERIAL PRODUCTS ARE POPULAR, STUDIES INDICATE THAT THEY DO NO BETTER THAN SOAP AND WATER. SOME SCIENTISTS EVEN WORRY THAT THE PRODUCTS MAY DO MORE HARM THAN GOOD.	http://infoweb.newsbank.com/resources/doc/nb/news/0EB735FBA46790F4?p=AWNB	The more bacteria are exposed to them, he said, the more likely they are to develop ways of eluding them.
442	WASHOUTS IN THE WAR ON GERMS? WHILE ANTIBACTERIAL PRODUCTS ARE POPULAR, STUDIES INDICATE THAT THEY DO NO BETTER THAN SOAP AND WATER. SOME SCIENTISTS EVEN WORRY THAT THE PRODUCTS MAY DO MORE HARM THAN GOOD.	http://infoweb.newsbank.com/resources/doc/nb/news/0EB735FBA46790F4?p=AWNB	because triclosan targets a particular part of the cell - a gene - it primes the bacteria for genetic mutations that may produce a hardier, more resistant strain.
443	PROPOSED BAN OF ANTIBIOTICS FOR POULTRY GAINS CRITICISM	http://infoweb.newsbank.com/resources/doc/nb/news/0EB7367CAF99CC2E?p=AWNB	Resistance develops when antibiotics are overused, both by doctors treating people and by farmers treating animals.
444	PROPOSED BAN OF ANTIBIOTICS FOR POULTRY GAINS CRITICISM	http://infoweb.newsbank.com/resources/doc/nb/news/0EB7367CAF99CC2E?p=AWNB	The drugs were approved for chickens, turkeys and cattle in the mid-1990s, and resistance to campylobacter began to increase soon afterward, according to CDC data.
445	Tough-to-treat infections more widespread	http://infoweb.newsbank.com/resources/doc/nb/news/102124848F467887?p=AWNB	A new study at Children's Hospital of Philadelphia observed a significant rise in antibiotic-resistant Staphylococcus aureus - commonly called staph
446	FDA bans antibiotic's use in poultry	http://infoweb.newsbank.com/resources/doc/nb/news/10BABC4A8DEF13E0?p=AWNB	Use of enrofloxacin in poultry does not eliminate campylobacter from the birds but instead helps develop bacteria resistant to this type of drug, Crawford said.
447	Merck's promising new bacteria-killer - The compound is in the early stages of testing.	http://infoweb.newsbank.com/resources/doc/nb/news/111BA2AAD4DEA6C0?p=AWNB	Now, older antibiotics have become less effective as bacteria evolved and acquired the ability to survive them.
448	Merck's promising new bacteria-killer - The compound is in the early stages of testing.	http://infoweb.newsbank.com/resources/doc/nb/news/111BA2AAD4DEA6C0?p=AWNB	"It is exciting that at least we have taken a step forward as more resistant organisms emerge," Topiel said.
449	Merck's promising new bacteria-killer - The compound is in the early stages of testing.	http://infoweb.newsbank.com/resources/doc/nb/news/111BA2AAD4DEA6C0?p=AWNB	"Every time we have had a superdrug developed, the bacteria have developed resistance,"
450	Tougher than MRSA, they beat most drugs	http://infoweb.newsbank.com/resources/doc/nb/news/11CC10BC54A10180?p=AWNB	Drug-resistant bacteria of various types are far less frequent than the strains from which they evolved, but infections are far harder to treat.
451	Tougher than MRSA, they beat most drugs	http://infoweb.newsbank.com/resources/doc/nb/news/11CC10BC54A10180?p=AWNB	Resistance rises with an antibiotic's use, so when a good one comes out, doctors may hold it in reserve.
452	Tougher than MRSA, they beat most drugs	http://infoweb.newsbank.com/resources/doc/nb/news/11CC10BC54A10180?p=AWNB	Similar cases across the nation worry medical experts who say new, highly drug-resistant strains of common bacteria have emerged in the last several years.
453	Who gets the antibiotics? - When the drugs are used in animal feed, scientists say, they lose effectiveness in humans. A new bill aims to curb such use; farmers oppose it.	http://infoweb.newsbank.com/resources/doc/nb/news/12AB82CD1458A610?p=AWNB	Microbes can develop resistance any time antibiotics are used,
454	Evolution hints at a superbug strategy	http://infoweb.newsbank.com/resources/doc/nb/news/139E57F3EB92C130?p=AWNB	it makes sense to let drugs and the immune system "gang up" on infections, whether it's the malaria parasite, TB, a staph bacteria, or even cancer cells, since they, too, can evolve drug-resistant strains.
455	Evolution hints at a superbug strategy	http://infoweb.newsbank.com/resources/doc/nb/news/139E57F3EB92C130?p=AWNB	so infectious bugs can pick up resistance-conferring genes from normal friendly bacteria, which are also under pressure to develop resistance when patients get antibiotics.
456	Miracle drugs losing magic in more cases	http://infoweb.newsbank.com/resources/doc/nb/news/0EAF847774AD4C9B?p=AWNB	One study shows resistance to penicillin alone has been hovering around 2 percent in the Los Angeles area, which leads many doctors to predict an eventual increase
457	Scientists warn: Germs are gaining	http://infoweb.newsbank.com/resources/doc/nb/news/0EB04226D2FF5F8F?p=AWNB	"We are in a race between microbial evolution and our social intelligence,"
458	Scientists warn: Germs are gaining	http://infoweb.newsbank.com/resources/doc/nb/news/0EB04226D2FF5F8F?p=AWNB	The world's population has "never been more vulnerable" to the threat of emerging and re-emerging infections,
459	Scientists warn: Germs are gaining	http://infoweb.newsbank.com/resources/doc/nb/news/0EB04226D2FF5F8F?p=AWNB	inner said more research is needed to determine how much of this increase is due to drug resistance or other factors.
460	Mutant bacteria running amok in suburbs - Fighting viruses with antibiotics doesn't work but when patients demand them anyway, they risk their own health and the health of others.	http://infoweb.newsbank.com/resources/doc/nb/news/0EB0431A796574B4?p=AWNB	If antibiotics are overused, bacteria will mutate and form defenses to outwit the medicine and survive
461	Study criticizes practice of feeding antibiotics to animals - The public health is at risk, a report says, because strains of bacteria are being created that resist treatment.	http://infoweb.newsbank.com/resources/doc/nb/news/0EB0434AD332AFEC?p=AWNB	The study said it's uncertain, though, how much the use of antibiotics in animals has contributed to the recent increase in resistant strains of bacteria that infect humans.
462	OVERPRESCRIPTION OF ANTIBIOTICS PROMPTS WARNING	http://infoweb.newsbank.com/resources/doc/nb/news/0F360C78CA55F468?p=AWNB	The free flow of antibiotics, especially increasing reliance on high-powered, expensive drugs, is giving rise to bacteria resistant to available antibiotics.
463	OVERPRESCRIPTION OF ANTIBIOTICS PROMPTS WARNING	http://infoweb.newsbank.com/resources/doc/nb/news/0F360C78CA55F468?p=AWNB	``Increased use of antimicrobial drugs has coincided with an increase in drug-resistant organisms, which has resulted in the use of more toxic and expensive alternative drugs,'
464	MDS IN SHOCK OVER GERMS' HIGH RESISTANCE	http://infoweb.newsbank.com/resources/doc/nb/news/0F360D0DF34BC15D?p=AWNB	Health authorities throughout the nation have been concerned for several years about signs of a gradual increase in penicillin resistance among S. pneumoniae bacteria
465	Staph germ approaching full resistance	http://infoweb.newsbank.com/resources/doc/nb/news/0F3647F4D70B92AE?p=AWNB	None
466	Gaps in safety system let `bugs' hide in food	http://infoweb.newsbank.com/resources/doc/nb/news/0F364B39237A6276?p=AWNB	Bacteria resilient, mutating to resist varied antibiotics
467	FDA approves long-needed new antibiotic	http://infoweb.newsbank.com/resources/doc/nb/news/0F364F4A33B80033?p=AWNB	And doctors should not use Synercid when other antibiotics will do, because overuse will simply hasten bacteria's inevitable development of resistance against this new drug, the FDA warned.
468	Preservative just may be good for you	http://infoweb.newsbank.com/resources/doc/nb/news/0F364FE287E8C7C0?p=AWNB	Even better, bugs do not seem to evolve resistance against it the way they do against vancomycin and other drugs.
469	Preservative just may be good for you	http://infoweb.newsbank.com/resources/doc/nb/news/0F364FE287E8C7C0?p=AWNB	Doctors say it is only a matter of time before bacteria, which evolve quickly because of their rapid life cycle, develop resistance to all current antibiotics.
470	WHO raising red flag over bugs that resist drugs	http://infoweb.newsbank.com/resources/doc/nb/news/0F365732126FE0D1?p=AWNB	Bacteria, parasites and viruses all naturally evolve to fight treatment.
471	WHO raising red flag over bugs that resist drugs	http://infoweb.newsbank.com/resources/doc/nb/news/0F365732126FE0D1?p=AWNB	The World Health Organization warned Monday that increasingly drug-resistant infections in rich and developing nations alike are threatening to make once-treatable diseases incurable
472	Health experts seek to rein in antibiotics - Drug overuse, misuse linked to 'super germs'	http://infoweb.newsbank.com/resources/doc/nb/news/0F369C60E4449F32?p=AWNB	There are germs out there that are almost impossible to treat right now," he said. And more are emerging.
473	Health experts seek to rein in antibiotics - Drug overuse, misuse linked to 'super germs'	http://infoweb.newsbank.com/resources/doc/nb/news/0F369C60E4449F32?p=AWNB	that prevents the development of resistance to more complex antibiotics.
474	Health experts seek to rein in antibiotics - Drug overuse, misuse linked to 'super germs'	http://infoweb.newsbank.com/resources/doc/nb/news/0F369C60E4449F32?p=AWNB	"We've seen a tenfold increase in resistance over a three-year period in Utah, and that's scary," Stephen Alder of the Community Health Program at the University of Utah Medical Center said
475	New antibiotic fails to halt fast-evolving bacteria strain	http://infoweb.newsbank.com/resources/doc/nb/news/0F369C6A145F5F9E?p=AWNB	Five Chicago patients have caught some of the first recorded infections from a strain of bacteria that has evolved so quickly it can overcome even the newest antibiotic
476	New antibiotic fails to halt fast-evolving bacteria strain	http://infoweb.newsbank.com/resources/doc/nb/news/0F369C6A145F5F9E?p=AWNB	One of the most pressing concerns in recent years has been the emergence of staphylococcus infections resistant to vancomycin
477	New antibiotic fails to halt fast-evolving bacteria strain	http://infoweb.newsbank.com/resources/doc/nb/news/0F369C6A145F5F9E?p=AWNB	Of the five Chicago patients who developed Zyvox-resistant infections, two died.
478	End the misuse of antibiotics	http://infoweb.newsbank.com/resources/doc/nb/news/0F369C6AF805FCC9?p=AWNB	If the illness does not respond to that treatment, physicians will slowly move on to the next drug, which should stem the development of resistance to more complex antibiotics.
479	End the misuse of antibiotics	http://infoweb.newsbank.com/resources/doc/nb/news/0F369C6AF805FCC9?p=AWNB	In Utah; health-care officials have observed a tenfold increase in resistance over a three-year period.
480	Meat findings stir antibiotics debate	http://infoweb.newsbank.com/resources/doc/nb/news/0F369DC7F016A885?p=AWNB	Overuse of antibiotics in humans and farm animals contributes to the rise of drug-resistant strains of bacteria.
481	Meat findings stir antibiotics debate	http://infoweb.newsbank.com/resources/doc/nb/news/0F369DC7F016A885?p=AWNB	But the researchers warned of future increases and suggested that use of the livestock drug, virginiamycin, may need to be limited.
482	McDonald's to stop using antibiotic-injected meat	http://infoweb.newsbank.com/resources/doc/nb/news/0FBCDB2DE00C4B4C?p=AWNB	None
483	Flu contagious sans symptoms	http://infoweb.newsbank.com/resources/doc/nb/news/106540359A1DC9FD?p=AWNB	But antibiotics can't be used to ward it off, and there's an increasing problem with resistance in pneumonia, just as with other bacterial infections, she said.
484	Use 'right drug for right bug'	http://infoweb.newsbank.com/resources/doc/nb/news/10E4DD80DD2AFAE0?p=AWNB	None
485	Hospital bacteria becoming more resistant to drugs	http://infoweb.newsbank.com/resources/doc/nb/news/11483D95D05A95A0?p=AWNB	None
486	Antibiotic addiction	http://infoweb.newsbank.com/resources/doc/nb/news/137CFD373A67EB68?p=AWNB	Bacteria develop resistance to antibiotics through natural selection.
487	An Overdose of Wonder Drugs	http://infoweb.newsbank.com/resources/doc/nb/news/0EB4EE20CD25F187?p=AWNB	The most disturbing rise in resistance has occurred in bacteria that cause serious intestinal infections -strains of salmonella
488	An Overdose of Wonder Drugs	http://infoweb.newsbank.com/resources/doc/nb/news/0EB4EE20CD25F187?p=AWNB	A major concern now is the emergence of new infectious strains capable of causing diseases more untreatable than ever
489	An Overdose of Wonder Drugs	http://infoweb.newsbank.com/resources/doc/nb/news/0EB4EE20CD25F187?p=AWNB	Because these antibiotic producers can destroy any sensitive microbes living nearby, the soil-dwelling organisms that developed resistance would have a clear survival advantage
490	An Overdose of Wonder Drugs	http://infoweb.newsbank.com/resources/doc/nb/news/0EB4EE20CD25F187?p=AWNB	The overuse of these valuable drugs, whether on livestock or people, has significantly increased the number of resistant bacterial strains, including those that cause gonorrhea, tuberculosis and meningitis
491	Salmonella Cases - Cattle Antibiotics Faulted	http://infoweb.newsbank.com/resources/doc/nb/news/0EB4EF1C99F09B97?p=AWNB	None
492	Kids' Ear Problems - Penicillin Losing Some Punch	http://infoweb.newsbank.com/resources/doc/nb/news/0EB4F142702AD09D?p=AWNB	If left untreated, middle ear infections can be deadly, evolving into meningitis or encephalitis,
493	Kids' Ear Problems - Penicillin Losing Some Punch	http://infoweb.newsbank.com/resources/doc/nb/news/0EB4F142702AD09D?p=AWNB	Bacteria that cause ear infections in children are becoming increasingly resistant to penicillin, new studies have found.
494	Germs Beating A Common Antibiotic	http://infoweb.newsbank.com/resources/doc/nb/news/0EB4F23C5DEEF811?p=AWNB	"Their usefulness has been reduced by the increase in resistance to the drug,"
495	Firefly Glow Speeds Testing of TB Drugs	http://infoweb.newsbank.com/resources/doc/nb/news/0EB4F50D4C96514F?p=AWNB	None
496	Anti-Bacterial Cleaners Squash Bugs	http://infoweb.newsbank.com/resources/doc/nb/news/0EB4F921DF026CB8?p=AWNB	While antibiotic resistance remains a serious concern to health officials, many experts say the emerging superbugs are more likely linked to the misuse and abuse of antibiotics by doctors and patients, such as doctors prescribing antibiotics for viral infections or patients not completing a full course of medication.
497	Anti-Bacterial Cleaners Squash Bugs	http://infoweb.newsbank.com/resources/doc/nb/news/0EB4F921DF026CB8?p=AWNB	"Just like if you were taking an antibiotic for a particular illness and stopped midway through treatment, the disease can mutate.
498	Antibiotics vs. superbugs	http://infoweb.newsbank.com/resources/doc/nb/news/0ED10E7CC72738D5?p=AWNB	The dilemma is how to balance the need to use antibiotics to treat and protect the health of livestock with the inevitable increase of bacteria resistant to drugs.
499	Antibiotics vs. superbugs	http://infoweb.newsbank.com/resources/doc/nb/news/0ED10E7CC72738D5?p=AWNB	Because the pharmaceutical industry deploys the same antibiotics for animals and people, mutating bacteria becomes resistant to the drugs use for both livestock and humans.
500	Berkeley clinic finds hardy bug in infections - Antibiotic resistance also seen in Midwest	http://infoweb.newsbank.com/resources/doc/nb/news/0EF2582FE092F9B7?p=AWNB	No
501	Bacteria resisting drug treatment - Infection outbreak elsewhere appears among gay men in S.F.	http://infoweb.newsbank.com/resources/doc/nb/news/0F8EEB36D7D25210?p=AWNB	Dr. Marcus Conant, a dermatologist and one of the first doctors to treat AIDS patients, said he's had two patients develop resistant staph recently, both of whom had weakened immune systems.
502	SAN FRANCISCO - CDC concerned about drug-resistant TB - San Francisco has highest rate of disease in country	http://infoweb.newsbank.com/resources/doc/nb/news/1108EE3BA77D7B58?p=AWNB	The Centers for Disease Control and Prevention reported for the first time Thursday on the emergence of "extensively drug-resistant" tuberculosis, which does not respond to most first- or second-line drug therapies for TB.
503	SAN FRANCISCO - CDC concerned about drug-resistant TB - San Francisco has highest rate of disease in country	http://infoweb.newsbank.com/resources/doc/nb/news/1108EE3BA77D7B58?p=AWNB	But it's critical that patients adhere to a strict drug-maintenance schedule, or they risk developing a resistance to the drugs. P
504	SAN FRANCISCO - CDC concerned about drug-resistant TB - San Francisco has highest rate of disease in country	http://infoweb.newsbank.com/resources/doc/nb/news/1108EE3BA77D7B58?p=AWNB	Drug-resistant tuberculosis cases increased 13.3 percent in the United States from 2003 to 2004 -- the largest year-over-year increase since 1993.
505	Science to the rescue: Sunnyvale company tapped for national effort to defeat bacterium that kills more in U.S. than AIDS	http://infoweb.newsbank.com/resources/doc/nb/news/11C8FE9E53B05438?p=AWNB	But he said blanket use of alternative antibiotics would foster the development of germs resistant to those drugs as well, leaving doctors with fewer remaining weapons against MRSA.
506	Science to the rescue: Sunnyvale company tapped for national effort to defeat bacterium that kills more in U.S. than AIDS	http://infoweb.newsbank.com/resources/doc/nb/news/11C8FE9E53B05438?p=AWNB	But the antibiotic also gives a survival edge to mutated forms of the germ that can thrive despite the treatment.
507	Falling behind: Medical research funding drops as deadly mutations are increasingly able to beat antibiotics	http://infoweb.newsbank.com/resources/doc/nb/news/11E4EAEFFAC0F078?p=AWNB	As MRSA continues its natural evolution, even more drug-resistant strains are emerging.
508	Falling behind: Medical research funding drops as deadly mutations are increasingly able to beat antibiotics	http://infoweb.newsbank.com/resources/doc/nb/news/11E4EAEFFAC0F078?p=AWNB	in his view, when bacteria develop resistance to modern antibiotics, they are merely rolling out old tricks they mastered eons ago in their struggle to live in harsh environments in competition with similarly resilient species.
509	Falling behind: Medical research funding drops as deadly mutations are increasingly able to beat antibiotics	http://infoweb.newsbank.com/resources/doc/nb/news/11E4EAEFFAC0F078?p=AWNB	The reasons for increasing drug resistance are well known:
510	Falling behind: Medical research funding drops as deadly mutations are increasingly able to beat antibiotics	http://infoweb.newsbank.com/resources/doc/nb/news/11E4EAEFFAC0F078?p=AWNB	Overuse of antibiotics, which speeds the natural evolution of bacteria, promoting new mutant strains resistant to those drugs.
511	Beating bad bugs: Economics and evolution frustrate effort to eliminate a growing threat	http://infoweb.newsbank.com/resources/doc/nb/news/11E767C32E9AE498?p=AWNB	These drugs repeatedly raised hopes that the resistance problem could be tamed, but even as scientists developed new generations of cephalosporins, bacteria methodically evolved ways to sidestep each one.
512	Beating bad bugs: Economics and evolution frustrate effort to eliminate a growing threat	http://infoweb.newsbank.com/resources/doc/nb/news/11E767C32E9AE498?p=AWNB	But penicillin-resistant strains of bacteria quickly emerged equipped with enzymes called beta-lactamases, which can knock out those carbon rings.
513	Beating bad bugs: Economics and evolution frustrate effort to eliminate a growing threat	http://infoweb.newsbank.com/resources/doc/nb/news/11E767C32E9AE498?p=AWNB	A new antibiotic, methicillin, came out in 1960, but within a year some staph germs had developed a defense against that drug, too.
514	Beating bad bugs: Economics and evolution frustrate effort to eliminate a growing threat	http://infoweb.newsbank.com/resources/doc/nb/news/11E767C32E9AE498?p=AWNB	Alarmed by the need to keep ahead of rapidly mutating bacterial strains, researchers since then have developed four successive generations of cephalosporins - the first came out in 1964.
515	EDITORIAL Antibiotics in animals a threat to food supply	http://infoweb.newsbank.com/resources/doc/nb/news/1475D9F8163954C0?p=AWNB	While hospitals and doctors have grown increasingly restrictive about giving antibiotics to patients, there are very few regulations on antibiotic use in agriculture.
516	BACTERIA BECOMING UNBEATABLE// RESISTANCE TO ANTIBIOTICS EVOLVING IN MANY STRAINS	http://infoweb.newsbank.com/resources/doc/nb/news/0EB5DD9ECFAFA793?p=AWNB	Common bacteria that cause pneumonia, children's ear infections and many other diseases are evolving into forms untreatable by all known medicines, threatening a chilling post-antibiotic era that would be ``nothing short of a medical disaster,'' a researcher said Saturday.
517	BACTERIA BECOMING UNBEATABLE// RESISTANCE TO ANTIBIOTICS EVOLVING IN MANY STRAINS	http://infoweb.newsbank.com/resources/doc/nb/news/0EB5DD9ECFAFA793?p=AWNB	But certain uncommon bacteria already have developed untreatable strai
518	MORE GERMS GAIN RESISTANCE TO DRUGS	http://infoweb.newsbank.com/resources/doc/nb/news/0EB5DE4A134706C1?p=AWNB	Antibiotic resistance is almost as old as the antibiotic era, which began after the discovery of penicillin in 1928. Within a few years, doctors witnessed the evolution of microbes that were impervious to the medicine.
519	MORE GERMS GAIN RESISTANCE TO DRUGS	http://infoweb.newsbank.com/resources/doc/nb/news/0EB5DE4A134706C1?p=AWNB	Among the most worrisome problems is the emergence of common intestinal microbes called enterococci that are resistant to vancomycin, the main drug used against them.
520	MORE GERMS GAIN RESISTANCE TO DRUGS	http://infoweb.newsbank.com/resources/doc/nb/news/0EB5DE4A134706C1?p=AWNB	About 85 percent of the types of bacteria responsible for hospital-acquired infections gradually have developed resistance to common antibiotics, said Dr. Martin Favero of the Centers for Disease Control and Prevention in Atlanta.
521	MORE GERMS GAIN RESISTANCE TO DRUGS	http://infoweb.newsbank.com/resources/doc/nb/news/0EB5DE4A134706C1?p=AWNB	This happens either through random genetic mutation or by picking up a resistance gene from another strain of bacteria.
522	LAST-RESORT ANTIBIOTIC ISN'T WORKING AS OFTEN	http://infoweb.newsbank.com/resources/doc/nb/news/0EB5DF43F11BA131?p=AWNB	Bacteria become increasingly resistant to penicillin, erythromycin, tetracycline and vancomycin. All were once big weapons against infection.
523	VIRULENT DISEASES MAKE COMEBACK//BACTERIA, WORLD SHIFTING	http://infoweb.newsbank.com/resources/doc/nb/news/0EB5DEBCA3D37A02?p=AWNB	But now, up to 30 percent of hospital-acquired infections have become immune to all but one antibiotic, vancomycin, and a new strain of microorganism has emerged that is immune to that as well
524	VIRULENT DISEASES MAKE COMEBACK//BACTERIA, WORLD SHIFTING	http://infoweb.newsbank.com/resources/doc/nb/news/0EB5DEBCA3D37A02?p=AWNB	Microbes have an amazing ability to mutate and produce strains that are resistant to more and more antibiotics. Overuse and misuse of antibiotics have sped up the process.
525	MEDICINE-RESISTANT GERM MAKES U.S. APPEARANCE//MAN IN MICHIGAN FIRST IN NATION TO HAVE STRAIN	http://infoweb.newsbank.com/resources/doc/nb/news/0EB5E1F15D84BC38?p=AWNB	For patients, the rise of drug-resistant germs means that the medicine they get for their infection may not make them better, forcing doctors to switch to one or more of the 100 antibiotics now on the market.
526	MEDICINE-RESISTANT GERM MAKES U.S. APPEARANCE//MAN IN MICHIGAN FIRST IN NATION TO HAVE STRAIN	http://infoweb.newsbank.com/resources/doc/nb/news/0EB5E1F15D84BC38?p=AWNB	``The timer is going off,'' said Dr. William Jarvis, a medical epidemiologist with the Centers for Disease Control and Prevention. ``We were concerned it would emerge here, it has emerged here and we are concerned we're going to see it popping up in more places.''
527	CHILDREN CARRY RESISTANCE TO ANTIBIOTICS, STUDY FINDS	http://infoweb.newsbank.com/resources/doc/nb/news/0EB5E2546E227833?p=AWNB	None
528	ANTIBIOTICS FOR ANIMALS MAY THREATEN FOOD SAFETY	http://infoweb.newsbank.com/resources/doc/nb/news/0EB5E2DFE1A8403B?p=AWNB	But scientists say antibiotics on the farm are helping foodborne germs mutate, too, even as the government is under pressure to approve more agricultural drugs.
529	DOCTORS LAUNCH CAMPAIGN TO REDUCE ANTIBIOTIC USE	http://infoweb.newsbank.com/resources/doc/nb/news/0EB5E3AAD04AFE2A?p=AWNB	The study also will examine whether the public campaign slows the development of tougher bacteria strains that gradually become resistant to antibiotics.
530	DRUG-RESISTANT BUG A SERIOUS DEVELOPMENT//EXPERTS POINT OUT ANTIBIOTIC OVERUSE AS PART OF PROBLEM	http://infoweb.newsbank.com/resources/doc/nb/news/0EB5E403C34668BF?p=AWNB	This widespread misuse enables bacteria to mutate into antibiotic-resistant killers.
531	ANTIBIOTIC SHOWS PROMISE FOR TREATING STUBBORN INFECTIONS	http://infoweb.newsbank.com/resources/doc/nb/news/0EB5E414B3C46282?p=AWNB	Because the drug will be different from anything that bacteria have encountered before, resistance should be rare. ``We believe that resistance will be very slow to emerge,'' said Dr. George Eliopoulos of Brigham and Women's Hospital in Boston.
532	SYNTHETIC MOLECULE FIGHTS DRUG-RESISTANT BACTERIA//UW RESEARCHERS CREATE SUBSTANCE BASED ON PEPTIDES	http://infoweb.newsbank.com/resources/doc/nb/news/0EB7399B692B965E?p=AWNB	Because the molecule works differently than traditional antibiotics, it probably would be harder for bacteria to evolve resistance to it, said Marissa Miller of the National Institute of Allergies and Infectious Diseases.
533	EDUCATION EFFORT CUTS ANTIBIOTIC USE FOR KIDS	http://infoweb.newsbank.com/resources/doc/nb/news/0EE61DA416F8D5D6?p=AWNB	None
534	COMING TO TERMS WITH GERMS - AN EXCELLENT NEW BOOK STUDIES MICROBES AND MAKES ALL THOSE BIG SCIENTIFIC THEORIES UNDERSTANDABLE, EVEN INTRIGUING. PROBLEM IS, IT WILL SCARE THE LIVING DAYLIGHTS OUT OF YOU.	http://infoweb.newsbank.com/resources/doc/nb/news/0F9BBB2F57A9822E?p=AWNB	Rather than make bacteria weaker, antibiotics, we now see, are recipes for the bacteria to use to evolve to be stronger.
535	COMING TO TERMS WITH GERMS - AN EXCELLENT NEW BOOK STUDIES MICROBES AND MAKES ALL THOSE BIG SCIENTIFIC THEORIES UNDERSTANDABLE, EVEN INTRIGUING. PROBLEM IS, IT WILL SCARE THE LIVING DAYLIGHTS OUT OF YOU.	http://infoweb.newsbank.com/resources/doc/nb/news/0F9BBB2F57A9822E?p=AWNB	There are as many ways for a science book to go wrong as there are ways for a bacterium to mutate.
536	RESISTANT GERM A RISING THREAT EXPERTS SAY DANGEROUS STAPH STRAIN GROWING MORE COMMONPLACE	http://infoweb.newsbank.com/resources/doc/nb/news/1096DCA24ECDC6E7?p=AWNB	The widespread emergence of the microbe is the latest manifestation of the growing threat of antibiotic resistance, a trend that has seen an increasing number of microorganisms evolve into strains that defeat many of modern medicine's most important weapons.
537	THESE BACTERIA BEAT MOST DRUGS - MRSA MAKES THE NEWS, BUT OTHER BUGS FRIGHTEN DOCTORS EVEN MORE	http://infoweb.newsbank.com/resources/doc/nb/news/11D0F8529E35F2A0?p=AWNB	Resistance rises with an antibiotic's use, so when a good one comes out, doctors may hold it in reserve.
538	THESE BACTERIA BEAT MOST DRUGS - MRSA MAKES THE NEWS, BUT OTHER BUGS FRIGHTEN DOCTORS EVEN MORE	http://infoweb.newsbank.com/resources/doc/nb/news/11D0F8529E35F2A0?p=AWNB	In April, GlaxoSmithKline and the Wellcome Trust announced a partnership to target emerging drug-resistant strains of Gram-negative bacteria.
539	SOIL BACTERIA FOUND TO THRIVE ON ANTIBIOTICS - RACE IS ON TO FIGURE OUT HOW THEY DO IT	http://infoweb.newsbank.com/resources/doc/nb/news/11FDC7348460D1B0?p=AWNB	So the next step, under way now in Church's lab, is to identify the actual genes that let these bacteria devour and degrade antibiotics.
540	STAPH GETS TOUGHER, KIDS GET SICKER - EAR, NOSE, THROAT INFECTIONS SOAR IN U.S., STUDY FINDS	http://infoweb.newsbank.com/resources/doc/nb/news/125DB49F5EAE0CB8?p=AWNB	MRSA, or methicillin-resistant Staphylococcus aureus, can cause dangerous, life-threatening invasive infections, and doctors believe inappropriate use of antibiotics has contributed to its rise.
541	STAPH GETS TOUGHER, KIDS GET SICKER - EAR, NOSE, THROAT INFECTIONS SOAR IN U.S., STUDY FINDS	http://infoweb.newsbank.com/resources/doc/nb/news/125DB49F5EAE0CB8?p=AWNB	MRSA infections were once limited mostly to hospitals, nursing homes and other health care settings, but other studies have shown they are increasingly picked up in the community in otherwise healthy peop
542	For sinus infection, antibiotics aren't better than waiting it out, study says	http://infoweb.newsbank.com/resources/doc/nb/news/13CF8463F4AC8328?p=AWNB	Over-use of antibiotics is considered an important and growing public-health problem, as disease-causing bacteria continue to develop resistance to the drugs we rely on to kill them.
543	A threat to modern medicine	http://infoweb.newsbank.com/resources/doc/nb/news/1404914CAF233ED8?p=AWNB	Through the relentless process of evolution, pathogens are evading the drugs, a problem known broadly as antimicrobial resistance.
544	A threat to modern medicine	http://infoweb.newsbank.com/resources/doc/nb/news/1404914CAF233ED8?p=AWNB	Increasingly, microbes are becoming untreatable.
545	Superbugs could soon kill more people than cancer	http://infoweb.newsbank.com/resources/doc/nb/news/152451B0522EF7E0?p=AWNB	No
546	Superbug closes hospital's intensive care ward	http://infoweb.newsbank.com/resources/doc/nb/news/10546079CFCED4E2?p=AWNB	Professor Grove said Pseudomonas was capable of mutating to increase its resistance to antibiotic treatments and that it most often affected hospital patients whose bodily defences were impaired.
547	New antibiotic hailed as breakthrough	http://infoweb.newsbank.com/resources/doc/nb/news/10546B938BB452B1?p=AWNB	A study in the medical journal The Lancet last July reported that a strain of staph bacteria had already developed a resistance to linezolid in the US.
548	New antibiotic hailed as breakthrough	http://infoweb.newsbank.com/resources/doc/nb/news/10546B938BB452B1?p=AWNB	Australian hospitals have a new weapon to combat the rise of deadly, drug-resistant "superbugs" in the form of a revolutionary synthetic antibiotic
549	Rise of the superbug rekindles interest in natural-born killers - Mind & Body	http://infoweb.newsbank.com/resources/doc/nb/news/10546E9833C27BC0?p=AWNB	But unhappily, they evolve rather quickly, and doctors have recklessly over-prescribed them. So now many bacteria - the so-called "superbugs" - have developed a resistance to antibiotics.
550	Rise of the superbug rekindles interest in natural-born killers - Mind & Body	http://infoweb.newsbank.com/resources/doc/nb/news/10546E9833C27BC0?p=AWNB	"The emergence of multi-drug-resistant bacteria means that nowadays people are dying from infections that, just five or 10 years ago, any medical student could have cured," Carlton says.
551	Rise of the superbug rekindles interest in natural-born killers - Mind & Body	http://infoweb.newsbank.com/resources/doc/nb/news/10546E9833C27BC0?p=AWNB	So now many bacteria - the so-called "superbugs" - have developed a resistance to antibiotics.
552	Rise of the superbug rekindles interest in natural-born killers - Mind & Body	http://infoweb.newsbank.com/resources/doc/nb/news/10546E9833C27BC0?p=AWNB	Merril says experiments suggest that germ resistance is less of a problem with phages than it is with antibiotics. "Furthermore, the phage-resistant bacteria mutants that were found in these experiments were less pathogenic (disease-producing)," Merril says.
553	Rise of the superbug rekindles interest in natural-born killers - Mind & Body	http://infoweb.newsbank.com/resources/doc/nb/news/10546E9833C27BC0?p=AWNB	Rise of the superbug rekindles interest in natural-born killers - Mind & Body
554	New killer bug could beat antibiotics	http://infoweb.newsbank.com/resources/doc/nb/news/136D18BE2C4C1298?p=AWNB	Elizabeth Harry, a microbiologist at the University of Technology in Sydney, backed Professor Stokes's call for hospital screening and said more bacterial genes like NDM-1 would emerge in coming years, making it harder to treat people every day. Without effective antibiotics, she said, organ transplants, chemotherapy and surgery would carry a high risk of death.
555	New killer bug could beat antibiotics	http://infoweb.newsbank.com/resources/doc/nb/news/136D18BE2C4C1298?p=AWNB	It has been caused by the widespread use and misuse of antimicrobial medicines and develops when a micro-organism mutates or acquires a resistance gene.
556	Wonder drug in frogs - HEALTH	http://infoweb.newsbank.com/resources/doc/nb/news/13D8DB9F5A79FFF8?p=AWNB	This made it hard for bacteria to develop resistance to them, she said.
557	Superbug reports spark concern - Health scare - Antibiotic-resistant bacteria on ascendancy	http://infoweb.newsbank.com/resources/doc/nb/news/145076BCD8D9ADD8?p=AWNB	None
558	Silver lining removed in medicine's war with bacteria	http://infoweb.newsbank.com/resources/doc/nb/news/14661CCD14CCA560?p=AWNB	"As with other antimicrobials, its overuse in consumer goods may render it less effective in medical environments and we'll potentially encounter the same problems we have with the overuse of antibiotics that has resulted in the emergence of antibiotic-resistant bacteria," Dr Marquis said.
559	Silver lining removed in medicine's war with bacteria	http://infoweb.newsbank.com/resources/doc/nb/news/14661CCD14CCA560?p=AWNB	To confirm this adaptive response, the team pre-exposed a laboratory strain of Bacillus subtilis to varying levels of nano-silver over 14 days. The bacteria developed resistance.
560	Keep our food safe: diseases expert calls for ban on some antibiotics for animals	http://infoweb.newsbank.com/resources/doc/nb/news/14736EAC233DAEC8?p=AWNB	"This means if resistance develops in bacteria to them, then there are no or few alternatives to treat serious infection," he said.
561	Critical time to fight infectious disease	http://infoweb.newsbank.com/resources/doc/nb/news/14B1AFF55D85B188?p=AWNB	Instead of laboriously developing a drug for a single new target present on resistant bacteria, these new antimicrobials will inactivate genes that control hundreds of targets, for the first time getting us in front of the bacteria's capacity to rapidly develop resistance to existing drugs.
562	Critical time to fight infectious disease	http://infoweb.newsbank.com/resources/doc/nb/news/14B1AFF55D85B188?p=AWNB	This has led to the rise of various bacteria resistant to all, or nearly all, of the current antibiotics.
563	OVERDOSING ON ANTIBIOTICS	http://infoweb.newsbank.com/resources/doc/nb/news/0FC9A8D141E57777?p=AWNB	culture of antibiotic use has developed, initiated by the gay abandon with which doctors prescribed the wonder drugs in the 1950s and 60s when there seemed to be a never-ending supply of new and better antibiotics.
564	OVERDOSING ON ANTIBIOTICS	http://infoweb.newsbank.com/resources/doc/nb/news/0FC9A8D141E57777?p=AWNB	The emergence of drug-resistant strains has prompted one international scientific journal to declare that people with multi-drug resistant TB "have no better chance of surviving than did TB patients a century ago".
565	Animal bugs jump to humans	http://infoweb.newsbank.com/resources/doc/nb/news/0FC9FB10F9F555FE?p=AWNB	Another concern is the development of vancomycin-resistant enterococci, which has been frequently reported in Europe and the US and is emerging in Australia.
566	Animal bugs jump to humans	http://infoweb.newsbank.com/resources/doc/nb/news/0FC9FB10F9F555FE?p=AWNB	Vancomycin-resistant golden staff strains have been found in Japan, France and the US, and doctors are concerned they will emerge here.
567	Bug-free food chain in sight	http://infoweb.newsbank.com/resources/doc/nb/news/0FC4BCED89763BDA?p=AWNB	None
568	Wonder drugs badly need a revival	http://infoweb.newsbank.com/resources/doc/nb/news/1061F9558DEBC5B8?p=AWNB	None
569	GERM warfare	http://infoweb.newsbank.com/resources/doc/nb/news/10D650298BF5E7A8?p=AWNB	``Strains that have arisen in the community do not appear to originate from hospitals -- they seem to come from several different parts of the world,'' Taylor says. ``The gene that controls resistance is the same apparently in all of the different strains. Yet we have markers that indicate that their lineage is different -- it's as if they're tribes coming from different parts of the world, all c…
570	GERM warfare	http://infoweb.newsbank.com/resources/doc/nb/news/10D650298BF5E7A8?p=AWNB	``We're not going to eliminate them, and we never will -- the best we can hope to do is to slow the rate of development of resistance,'' Tapsall says. He says a superbug containment drive that focuses largely on hospitals is ``doomed to failure''.
571	GERM warfare	http://infoweb.newsbank.com/resources/doc/nb/news/10D650298BF5E7A8?p=AWNB	One way to limit the increase of antibiotic resistance is to stop using so many antibiotics.
572	GERM warfare	http://infoweb.newsbank.com/resources/doc/nb/news/10D650298BF5E7A8?p=AWNB	In other words, it's our own use of antibiotics that is one of the factors driving resistance. They cure infections and save lives, but they also encourage small mutations in bacteria that help them survive.
573	Scramble for drugs to defeat superbug	http://infoweb.newsbank.com/resources/doc/nb/news/12DA60146893B9D0?p=AWNB	They are determined to develop new antibiotics capable of fighting the extreme drug resistance shown by the new superbug, which has evolved from the Acinetobacter pathogenic bacteria.
574	Superbug risk in food imports	http://infoweb.newsbank.com/resources/doc/nb/news/1319040779FC92F0?p=AWNB	They fear unless adequate steps are taken to properly regulate imports, such as apples, antimicrobial resistance in Australia will lessen, paving the way for an increase in the prevalence of superbugs.
575	Antibiotic trap a mystery to too many	http://infoweb.newsbank.com/resources/doc/nb/news/13E3B7C34CD54358?p=AWNB	NEARLY half of Australians do not realise that antibiotics kill only bacteria, according to research that suggests widespread ignorance about the drugs may be fuelling the rise of antibiotic-resistant superbugs.
576	Search for a cure is an antidote to the inane	http://infoweb.newsbank.com/resources/doc/nb/news/1443EEDF6E41A8D8?p=AWNB	None
577	Superbug threat causes experts to intensify testing on live food supply sources - - EXCLUSIVE	http://infoweb.newsbank.com/resources/doc/nb/news/1496FCAA2D94D6A8?p=AWNB	None
578	Australia in the path of superbug threat	http://infoweb.newsbank.com/resources/doc/nb/news/14D86BC8ED4DF238?p=AWNB	None
579	Fungus offers hope for drugs	http://infoweb.newsbank.com/resources/doc/nb/news/14EAB16347486CF8?p=AWNB	NDM-1, which emerged five years ago is a transmissible gene capable of transforming bacteria into drug-resistant superbugs.
580	Gonorrhea strain killed in Calgary	http://www.lexisnexis.com/lnacui2api/api/version1/getDocCui?lni=4MBD-B6P0-TXJ2-N0XF&csi=303830&hl=t&hv=t&hnsd=f&hns=t&hgn=t&oc=00240&perma=true	None
581	Antibiotic-resistant bacteria found in meat inspectors	http://www.lexisnexis.com/lnacui2api/api/version1/getDocCui?lni=4M9W-0G00-TXJ2-N1DV&csi=303830&hl=t&hv=t&hnsd=f&hns=t&hgn=t&oc=00240&perma=true	Dr. Panisset believes these mutant bacteria could raise the number of colds and stomach sicknesses the inspectors suffered as well as affect the dosage levels of antibiotics they require to fight other diseases.
582	Drug-resistant gonorrhea on rise, MDs told	http://www.lexisnexis.com/lnacui2api/api/version1/getDocCui?lni=4M9B-TXH0-TW7J-350G&csi=303830&hl=t&hv=t&hnsd=f&hns=t&hgn=t&oc=00240&perma=true	The strains have also developed resistance to tetracycline, leading doctors to use the more costly spectinomycin antibiotic.
583	Drug-resistant gonorrhea on rise, MDs told	http://www.lexisnexis.com/lnacui2api/api/version1/getDocCui?lni=4M9B-TXH0-TW7J-350G&csi=303830&hl=t&hv=t&hnsd=f&hns=t&hgn=t&oc=00240&perma=true	Drug-resistant gonorrhea on rise, MDs told
584	Multi-purpose tetracycline losing punch	http://www.lexisnexis.com/lnacui2api/api/version1/getDocCui?lni=4M9B-29V0-TW7J-3273&csi=303830&hl=t&hv=t&hnsd=f&hns=t&hgn=t&oc=00240&perma=true	No
585	COVER STORY How bugs outwit drugs Bacteria's new tactic: They swap genes to thwart antibiotics	http://www.lexisnexis.com/lnacui2api/api/version1/getDocCui?lni=4M94-97H0-TW7J-32CN&csi=303830&hl=t&hv=t&hnsd=f&hns=t&hgn=t&oc=00240&perma=true	Somehow, a drug-resistant from of Staphylococcus aureus emerged among elderly patients in the long-term care ward.
586	COVER STORY How bugs outwit drugs Bacteria's new tactic: They swap genes to thwart antibiotics	http://www.lexisnexis.com/lnacui2api/api/version1/getDocCui?lni=4M94-97H0-TW7J-32CN&csi=303830&hl=t&hv=t&hnsd=f&hns=t&hgn=t&oc=00240&perma=true	It was inevitable that bacteria would develop resistance.
587	COVER STORY How bugs outwit drugs Bacteria's new tactic: They swap genes to thwart antibiotics	http://www.lexisnexis.com/lnacui2api/api/version1/getDocCui?lni=4M94-97H0-TW7J-32CN&csi=303830&hl=t&hv=t&hnsd=f&hns=t&hgn=t&oc=00240&perma=true	In his book The Antibiotic Paradox: How Miracle Drugs are Destroying the Miracle, Dr. Levy sought to alert people to the threat posed by drug resistance, which can arise anywhere and spread around the globe.
588	MIDDLE KINGDOM RESEARCH Dental fillings may take the bite out of antibiotics	http://www.lexisnexis.com/lnacui2api/api/version1/getDocCui?lni=4M93-NXX0-TW7J-32TX&csi=303830&hl=t&hv=t&hnsd=f&hns=t&hgn=t&oc=00240&perma=true	The cause of the development of resistance is something of a mystery but microbiologists have now come up with a surprising new suspect: dental fillings.
589	Antibiotics losing the battle Tuberculosis among infectious diseases reappearing, scientist says	http://www.lexisnexis.com/lnacui2api/api/version1/getDocCui?lni=4M91-7VN0-TW7J-31YG&csi=303830&hl=t&hv=t&hnsd=f&hns=t&hgn=t&oc=00240&perma=true	Strains of the disease are evolving at a rapid pace toward the point where it could become immune from existing antibiotics.
590	Antibiotics losing the battle Tuberculosis among infectious diseases reappearing, scientist says	http://www.lexisnexis.com/lnacui2api/api/version1/getDocCui?lni=4M91-7VN0-TW7J-31YG&csi=303830&hl=t&hv=t&hnsd=f&hns=t&hgn=t&oc=00240&perma=true	The overuse of antibiotics has forced bacteria to respond with more and more mutations.
591	Drug-resistant bacteria seen as huge health risk Standard treatments no longer work, researcher warns	http://www.lexisnexis.com/lnacui2api/api/version1/getDocCui?lni=4M91-3GP0-TW7J-31W3&csi=303830&hl=t&hv=t&hnsd=f&hns=t&hgn=t&oc=00240&perma=true	At his institution alone, researchers have tracked 57 antibiotic- resistant bacteria so far this decade. "And things are evolving so rapidly that this slide was obsolete the day it was ready," Prof. Doern said,
592	Drug-resistant bacteria seen as huge health risk Standard treatments no longer work, researcher warns	http://www.lexisnexis.com/lnacui2api/api/version1/getDocCui?lni=4M91-3GP0-TW7J-31W3&csi=303830&hl=t&hv=t&hnsd=f&hns=t&hgn=t&oc=00240&perma=true	He said the principal cause of the phenomenal increase in resistant strains is overuse of antibiotics.
593	Mind & Matter Antibiotic arsenal is rapidly being depleted	http://www.lexisnexis.com/lnacui2api/api/version1/getDocCui?lni=4M91-3M00-TW7J-32KW&csi=303830&hl=t&hv=t&hnsd=f&hns=t&hgn=t&oc=00240&perma=true	For nearly two decades the Boston researcher and founder of the Alliance for the Prudent Use of Antibiotics has repeatedly warned that high antibiotic consumption encourages the emergence of rare strains of bacteria or super germs.
594	Mind & Matter Antibiotic arsenal is rapidly being depleted	http://www.lexisnexis.com/lnacui2api/api/version1/getDocCui?lni=4M91-3M00-TW7J-32KW&csi=303830&hl=t&hv=t&hnsd=f&hns=t&hgn=t&oc=00240&perma=true	Although medical specialists have long appreciated the ability of bacteria to evolve unique defences, they are openly dismayed by its quickening speed.
595	Mind & Matter Antibiotic arsenal is rapidly being depleted	http://www.lexisnexis.com/lnacui2api/api/version1/getDocCui?lni=4M91-3M00-TW7J-32KW&csi=303830&hl=t&hv=t&hnsd=f&hns=t&hgn=t&oc=00240&perma=true	"It took two decades for staph to develop resistance to methicillin across North America, but it only took enterococci (a ubiquitious intestinal bacteria), two years to beat vancomycin in the United States.
596	U.S. germs invading Canadian hospitals Antibiotics powerless against bacteria	http://www.lexisnexis.com/lnacui2api/api/version1/getDocCui?lni=4M8X-8B80-TW7J-32PF&csi=303830&hl=t&hv=t&hnsd=f&hns=t&hgn=t&oc=00240&perma=true	Bacteria are experts at adapting by making small changes in their gene structure to respond to the threat of antibiotics. Those that evolve into forms that can survive are able to spread unchecked.
597	U.S. germs invading Canadian hospitals Antibiotics powerless against bacteria	http://www.lexisnexis.com/lnacui2api/api/version1/getDocCui?lni=4M8X-8B80-TW7J-32PF&csi=303830&hl=t&hv=t&hnsd=f&hns=t&hgn=t&oc=00240&perma=true	But such dramatic examples as the flesh-eating disease and the re-emergence of tuberculosis and pneumonia, caused by microbes that have become resistant, show that the threat can have fatal consequences.
598	U.S. germs invading Canadian hospitals Antibiotics powerless against bacteria	http://www.lexisnexis.com/lnacui2api/api/version1/getDocCui?lni=4M8X-8B80-TW7J-32PF&csi=303830&hl=t&hv=t&hnsd=f&hns=t&hgn=t&oc=00240&perma=true	About 160 antibiotic drugs have been added to the arsenal since penicillin, but bacteria have been developing resistance to them as well.
599	U.S. germs invading Canadian hospitals Antibiotics powerless against bacteria	http://www.lexisnexis.com/lnacui2api/api/version1/getDocCui?lni=4M8X-8B80-TW7J-32PF&csi=303830&hl=t&hv=t&hnsd=f&hns=t&hgn=t&oc=00240&perma=true	the invader is a form of staph known as VRE, a mutated antibiotic-resistant version of enteroccoci found normally in the human bowel.
600	Antibiotic arsenal exhausted Scientists suggest a crisis is on its way in the long-running battle with bacteria that will see some common diseases untreatable in the next few years.	http://www.lexisnexis.com/lnacui2api/api/version1/getDocCui?lni=4M8X-K3C0-TW7J-323P&csi=303830&hl=t&hv=t&hnsd=f&hns=t&hgn=t&oc=00240&perma=true	For half a century, scientists stayed one step ahead of bacteria by developing a new antibiotic every time the bugs developed a resistance to the old ones.
601	Infection experts alarmed by drug-resistant bacteria Hospitals fear deadly complications in some cases	http://www.lexisnexis.com/lnacui2api/api/version1/getDocCui?lni=4M8W-XYR0-TW7J-33CG&csi=303830&hl=t&hv=t&hnsd=f&hns=t&hgn=t&oc=00240&perma=true	Bacteria can evolve to resist drugs because they can transplant portions of their genetic material from one strain to another, Dr. McGeer said. L
602	Infection experts alarmed by drug-resistant bacteria Hospitals fear deadly complications in some cases	http://www.lexisnexis.com/lnacui2api/api/version1/getDocCui?lni=4M8W-XYR0-TW7J-33CG&csi=303830&hl=t&hv=t&hnsd=f&hns=t&hgn=t&oc=00240&perma=true	The latest emergence of antibiotic-resistant bacteria in Canada has put officials on high alert.
603	Infection experts alarmed by drug-resistant bacteria Hospitals fear deadly complications in some cases	http://www.lexisnexis.com/lnacui2api/api/version1/getDocCui?lni=4M8W-XYR0-TW7J-33CG&csi=303830&hl=t&hv=t&hnsd=f&hns=t&hgn=t&oc=00240&perma=true	Drug companies have few new antibiotics in development because drug resistance has developed so quickly.
604	Infection experts alarmed by drug-resistant bacteria Hospitals fear deadly complications in some cases	http://www.lexisnexis.com/lnacui2api/api/version1/getDocCui?lni=4M8W-XYR0-TW7J-33CG&csi=303830&hl=t&hv=t&hnsd=f&hns=t&hgn=t&oc=00240&perma=true	However, infection specialists say bacteria are getting tougher and mutating quickly.
605	Third hospital hit by drug-resistant bacteria	http://www.lexisnexis.com/lnacui2api/api/version1/getDocCui?lni=4M8W-XYS0-TW7J-32N0&csi=303830&hl=t&hv=t&hnsd=f&hns=t&hgn=t&oc=00240&perma=true	Infection specialists worry that bacteria are mutating quickly and could soon turn simple infections or surgery into life-threatening events.
606	Hospitals map war against superbugs Quarantine plan to be weighed	http://www.lexisnexis.com/lnacui2api/api/version1/getDocCui?lni=4M8W-Y2K0-TW7J-323N&csi=303830&hl=t&hv=t&hnsd=f&hns=t&hgn=t&oc=00240&perma=true	Bacteria can evolve defences quickly because they have a remarkable ability to borrow not just pieces but entire strings of genetic material from other microbes.
607	Hospitals map war against superbugs Quarantine plan to be weighed	http://www.lexisnexis.com/lnacui2api/api/version1/getDocCui?lni=4M8W-Y2K0-TW7J-323N&csi=303830&hl=t&hv=t&hnsd=f&hns=t&hgn=t&oc=00240&perma=true	Laboratory experiments have already proved two types of antibiotic-resistant bacteria can pool their resources and result in a superbug, and it seems to be only a matter of time before they emerge in nature, according to Donald Low, chief of microbiology at Toronto's Mount Sinai Hospital.
608	Warning given on animal-feed antibiotics	http://www.lexisnexis.com/lnacui2api/api/version1/getDocCui?lni=4M8W-Y3M0-TW7J-3248&csi=303830&hl=t&hv=t&hnsd=f&hns=t&hgn=t&oc=00240&perma=true	"That kind of an exposure puts a pressure . . . to allow for resistant organisms to evolve," said Mr. Losos, director-general of the Laboratory Centre for Disease Control.
609	Warning given on animal-feed antibiotics	http://www.lexisnexis.com/lnacui2api/api/version1/getDocCui?lni=4M8W-Y3M0-TW7J-3248&csi=303830&hl=t&hv=t&hnsd=f&hns=t&hgn=t&oc=00240&perma=true	Antibiotics used in animal feed are contributing to the development of drug-resistant bacteria that pose a threat to human health, a top federal scientist says.
610	Team maps how 'bugs' defeat antibiotics McMaster scientists identify enzyme	http://www.lexisnexis.com/lnacui2api/api/version1/getDocCui?lni=4M8W-Y2P0-TW7J-33F1&csi=303830&hl=t&hv=t&hnsd=f&hns=t&hgn=t&oc=00240&perma=true	Once resistance develops, it is passed on to future generations of bacteria.
611	BODY WORKS HEALTH AND FITNESS When you shouldn't take antibiotics	http://www.lexisnexis.com/lnacui2api/api/version1/getDocCui?lni=4M8X-5TF0-TW7J-32X2&csi=303830&hl=t&hv=t&hnsd=f&hns=t&hgn=t&oc=00240&perma=true	Killing off only the weakest bacteria leaves more opportunity for strong bacteria to survive and increases the risk that a drug-resistant strain will develop.
612	BODY WORKS HEALTH AND FITNESS When you shouldn't take antibiotics	http://www.lexisnexis.com/lnacui2api/api/version1/getDocCui?lni=4M8X-5TF0-TW7J-32X2&csi=303830&hl=t&hv=t&hnsd=f&hns=t&hgn=t&oc=00240&perma=true	The most publicized reason has been the rise of strains of bacteria that resist antibiotics.
613	Montreal's Notre-Dame Hospital quarantines six patients carrying 'superbug'	http://www.lexisnexis.com/lnacui2api/api/version1/getDocCui?lni=4M8P-31H0-TW7J-3284&csi=303830&hl=t&hv=t&hnsd=f&hns=t&hgn=t&oc=00240&perma=true	None
614	Battle to curb antibiotic use being won, doctor says Older drugs working better as MDs become more careful about when and how to prescribe them	http://www.lexisnexis.com/lnacui2api/api/version1/getDocCui?lni=4M8C-DRS0-TW7J-3244&csi=303830&hl=t&hv=t&hnsd=f&hns=t&hgn=t&oc=00240&perma=true	This led to so-called superbugs with genetic mutations that make them stronger.
615	Virulent bacteria resist final drug Four cases reported in which antibiotic had no effect on sometimes fatal bug	http://www.lexisnexis.com/lnacui2api/api/version1/getDocCui?lni=4M8C-DS70-TW7J-324C&csi=303830&hl=t&hv=t&hnsd=f&hns=t&hgn=t&oc=00240&perma=true	A strain of bacteria responsible for sometimes fatal infections in hospitals is developing a resistance to the last antibiotic used to kill them completely, according to a report in the New England Journal of Medicine.
616	Virulent bacteria resist final drug Four cases reported in which antibiotic had no effect on sometimes fatal bug	http://www.lexisnexis.com/lnacui2api/api/version1/getDocCui?lni=4M8C-DS70-TW7J-324C&csi=303830&hl=t&hv=t&hnsd=f&hns=t&hgn=t&oc=00240&perma=true	Tests suggest that similar staph bacteria, already found in hospitals in the New York metropolitan area, have accumulated the raw material needed to develop a full-blown resistance to the antibiotic. One small mutation may be enough to complete the process
617	Virulent bacteria resist final drug Four cases reported in which antibiotic had no effect on sometimes fatal bug	http://www.lexisnexis.com/lnacui2api/api/version1/getDocCui?lni=4M8C-DS70-TW7J-324C&csi=303830&hl=t&hv=t&hnsd=f&hns=t&hgn=t&oc=00240&perma=true	In the three previous cases where a vancomycin-resistant strain had arisen, the specific bacteria infecting each patient had not developed a complete immunity to all antibiotics.
618	Resisting superbug blindness	http://www.lexisnexis.com/lnacui2api/api/version1/getDocCui?lni=4M8C-DTC0-TW7J-3276&csi=303830&hl=t&hv=t&hnsd=f&hns=t&hgn=t&oc=00240&perma=true	Bacteria, Earth's first inhabitants, mutate and, as they do, become increasingly resistant to all the sons and daughters of penicillin.
619	Vigilance required to ensure tuberculosis recovery Potential growth of drug-resistant strains means some patients must be monitored to see that medication is taken	http://www.lexisnexis.com/lnacui2api/api/version1/getDocCui?lni=4M8N-WNK0-TW7J-3259&csi=303830&hl=t&hv=t&hnsd=f&hns=t&hgn=t&oc=00240&perma=true	Otherwise, the disease can develop a resistance to one of the front-line antibiotics used to combat it: Isoniazid (INH) or Rifampin.
620	Farming's antibiotic threat; The use of drugs to make animals grow larger; has led to the emergence; of antibiotic-resistant bacteria in the food chain	http://www.lexisnexis.com/lnacui2api/api/version1/getDocCui?lni=4KXW-YD60-TXJ2-N3DR&csi=303830&hl=t&hv=t&hnsd=f&hns=t&hgn=t&oc=00240&perma=true	But critics in the animal industry dismiss charges that they're contributing to the emergence of resistance.
621	Farming's antibiotic threat; The use of drugs to make animals grow larger; has led to the emergence; of antibiotic-resistant bacteria in the food chain	http://www.lexisnexis.com/lnacui2api/api/version1/getDocCui?lni=4KXW-YD60-TXJ2-N3DR&csi=303830&hl=t&hv=t&hnsd=f&hns=t&hgn=t&oc=00240&perma=true	Vancomycin-resistant enterococci (VRE) are now endemic in U.S. hospitals and are rising in Canada.
622	Action needed on superbugs, researchers say	http://www.lexisnexis.com/lnacui2api/api/version1/getDocCui?lni=4KY3-7R00-TXJ2-N35Y&csi=303830&hl=t&hv=t&hnsd=f&hns=t&hgn=t&oc=00240&perma=true	Shirley Paton, who monitors these superbugs for Health Canada, said this latest bug should not be taken lightly. "We're at the beginning of its rise in Canada," she said.
623	No pressure to OK cow drug, official says	http://www.lexisnexis.com/lnacui2api/api/version1/getDocCui?lni=4KY6-JT60-TXJ2-N2S4&csi=303830&hl=t&hv=t&hnsd=f&hns=t&hgn=t&oc=00240&perma=true	In 1999, the U.S. Food and Drug Administration decided to revoke the approval of Baytril in light of evidence that its use in animals was contributing to a rise in drug-resistant diarrhea in humans.
624	Canada 2005?; The sanatoriums are long gone, but tuberculosis is not. It; remains, public health reporter ANDRÉ PICARD warns, one of the; world's great killers. Drug-resistant TB costs a fortune to fight; and even wealthy nations aren't immune to a serious outbreak. 'It; could happen in Toronto, if we're not careful,' one expert says	http://www.lexisnexis.com/lnacui2api/api/version1/getDocCui?lni=4KY9-W580-TXJ2-N24F&csi=303830&hl=t&hv=t&hnsd=f&hns=t&hgn=t&oc=00240&perma=true	In recent years, a new threat has emerged: multidrug-resistant tuberculosis.
625	Canada 2005?; The sanatoriums are long gone, but tuberculosis is not. It; remains, public health reporter ANDRÉ PICARD warns, one of the; world's great killers. Drug-resistant TB costs a fortune to fight; and even wealthy nations aren't immune to a serious outbreak. 'It; could happen in Toronto, if we're not careful,' one expert says	http://www.lexisnexis.com/lnacui2api/api/version1/getDocCui?lni=4KY9-W580-TXJ2-N24F&csi=303830&hl=t&hv=t&hnsd=f&hns=t&hgn=t&oc=00240&perma=true	These new strains develop when drugs are misused, usually when patients begin their TB treatment but don't complete it, allowing the bacteria to mutate.
626	Bacteria cause infection in 10 babies at hospital	http://www.lexisnexis.com/lnacui2api/api/version1/getDocCui?lni=4KXC-5K10-TXJ2-N32X&csi=303830&hl=t&hv=t&hnsd=f&hns=t&hgn=t&oc=00240&perma=true	None
627	Resistant TB worries WHO	http://www.lexisnexis.com/lnacui2api/api/version1/getDocCui?lni=4KY6-HJ40-TXJ2-N2H8&csi=303830&hl=t&hv=t&hnsd=f&hns=t&hgn=t&oc=00240&perma=true	Ultraresistant strains of tuberculosis occur most frequently in former Soviet countries and Asia, and are on the rise elsewhere, particularly in Africa.
628	Superbug came out of nowhere	http://www.lexisnexis.com/lnacui2api/api/version1/getDocCui?lni=4PM3-RKY0-TXJ2-N16K&csi=303830&hl=t&hv=t&hnsd=f&hns=t&hgn=t&oc=00240&perma=true	None
629	Ontario plans superbug warning; Toddler in hospital with drug-resistant bacterial strain triggered alert	http://www.lexisnexis.com/lnacui2api/api/version1/getDocCui?lni=4R3B-33Y0-TXJ2-N0XB&csi=303830&hl=t&hv=t&hnsd=f&hns=t&hgn=t&oc=00240&perma=true	None
630	Superbug on the rise	http://www.lexisnexis.com/lnacui2api/api/version1/getDocCui?lni=4RKM-4780-TXJ2-N15D&csi=303830&hl=t&hv=t&hnsd=f&hns=t&hgn=t&oc=00240&perma=true	Superbug on the rise
631	Superbug MRSA cases hit record level in Ontario	http://www.lexisnexis.com/lnacui2api/api/version1/getDocCui?lni=4TVH-HGX0-TXJ2-N14P&csi=303830&hl=t&hv=t&hnsd=f&hns=t&hgn=t&oc=00240&perma=true	Also worrisome were figures released on vancomycin-resistant enterocci (VRE), a strain of bacteria that has developed resistance to many commonly used antibiotics, specifically vancomycin.
632	Antibiotic resistant gonorrhea on the rise	http://www.lexisnexis.com/lnacui2api/api/version1/getDocCui?lni=4VHP-WXT0-TXJ2-N160&csi=303830&hl=t&hv=t&hnsd=f&hns=t&hgn=t&oc=00240&perma=true	Public health officials must take action to bring infection rates down to prevent more resistant strains from emerging and further limiting gonorrhea treatment options, he wrote.
633	Antibiotic resistant gonorrhea on the rise	http://www.lexisnexis.com/lnacui2api/api/version1/getDocCui?lni=4VHP-WXT0-TXJ2-N160&csi=303830&hl=t&hv=t&hnsd=f&hns=t&hgn=t&oc=00240&perma=true	One of the biggest disadvantages of antibiotics is that diseases can mutate and become resistant to the medication, according to Dr. Tapsall.
634	Antibiotic resistant gonorrhea on the rise	http://www.lexisnexis.com/lnacui2api/api/version1/getDocCui?lni=4VHP-WXT0-TXJ2-N160&csi=303830&hl=t&hv=t&hnsd=f&hns=t&hgn=t&oc=00240&perma=true	Antibiotic resistant gonorrhea on the rise
635	Watch your 'resistance footprint,' experts urge	http://www.lexisnexis.com/lnacui2api/api/version1/getDocCui?lni=7V1Y-6WT1-2RKY-7396&csi=303830&hl=t&hv=t&hnsd=f&hns=t&hgn=t&oc=00240&perma=true	They think that urging people to consider their "resistance footprint" may help patients and prescribing doctors get their heads around the notion that every time anyone uses antibiotics unnecessarily or inappropriately, it helps drive the development of resistant bacteria.
636	Watch your 'resistance footprint,' experts urge	http://www.lexisnexis.com/lnacui2api/api/version1/getDocCui?lni=7V1Y-6WT1-2RKY-7396&csi=303830&hl=t&hv=t&hnsd=f&hns=t&hgn=t&oc=00240&perma=true	The rise of antibiotic resistance makes it increasingly difficult to treat infections. And it puts many of the advances of modern-day medicine in jeopardy.
637	Canada braces for spread of medical-tourism bug; Two cases of resistant superbug confirmed in patients who had travelled to India	http://www.lexisnexis.com/lnacui2api/api/version1/getDocCui?lni=8053-9KJ0-YB30-Y54Y&csi=303830&hl=t&hv=t&hnsd=f&hns=t&hgn=t&oc=00240&perma=true	Experts are warning that a new type of drug-resistant superbug is emerging from India.
638	Gonorrhea superbug may soon be global threat	http://www.lexisnexis.com/lnacui2api/api/version1/getDocCui?lni=55TW-5GG1-F06S-31JP&csi=303830&hl=t&hv=t&hnsd=f&hns=t&hgn=t&oc=00240&perma=true	The emergence of drug-resistant or superbug strains of gonorrhea is caused by unregulated access to and overuse of antibiotics, which helps fuel natural genetic mutations within the bacteria.
639	Gonorrhea superbug may soon be global threat	http://www.lexisnexis.com/lnacui2api/api/version1/getDocCui?lni=55TW-5GG1-F06S-31JP&csi=303830&hl=t&hv=t&hnsd=f&hns=t&hgn=t&oc=00240&perma=true	Experts say the best way to reduce the risk of gonorrhea developing even greater resistance - beyond the urgent need to develop effective new drugs - is to treat it with combinations of two or more types of antibiotics at the same time.
640	Health Canada signs off on new C. difficile drug	http://www.lexisnexis.com/lnacui2api/api/version1/getDocCui?lni=561V-BJN1-F06S-32R0&csi=303830&hl=t&hv=t&hnsd=f&hns=t&hgn=t&oc=00240&perma=true	None
641	Grass-fed, 'natural' beef? It's likely no safer; Whether your dinner was raised on a feedlot or coddled on a local farm, research suggests it's equally liable to carry a pathogen	http://www.lexisnexis.com/lnacui2api/api/version1/getDocCui?lni=573G-FNJ1-F06S-33SH&csi=303830&hl=t&hv=t&hnsd=f&hns=t&hgn=t&oc=00240&perma=true	None
642	Europe facing TB 'time bomb'	http://www.lexisnexis.com/lnacui2api/api/version1/getDocCui?lni=594M-GB21-JCRP-C4GB&csi=303830&hl=t&hv=t&hnsd=f&hns=t&hgn=t&oc=00240&perma=true	None
643	Warning: prescribe with caution	http://www.lexisnexis.com/lnacui2api/api/version1/getDocCui?lni=59W3-VJD1-JCRP-C19J&csi=303830&hl=t&hv=t&hnsd=f&hns=t&hgn=t&oc=00240&perma=true	None
644	Lethal line: Defining 'outbreak' and the public's right to know	http://www.lexisnexis.com/lnacui2api/api/version1/getDocCui?lni=5BDF-RVD1-JCRP-C24D&csi=303830&hl=t&hv=t&hnsd=f&hns=t&hgn=t&oc=00240&perma=true	None
645	The new germ warfare; As many as 22 Canadians die every day from hospital-acquired infections. Carly Weeks reports from the front lines of a fight we cannot lose	http://www.lexisnexis.com/lnacui2api/api/version1/getDocCui?lni=5BDN-R401-JCRP-C2R7&csi=303830&hl=t&hv=t&hnsd=f&hns=t&hgn=t&oc=00240&perma=true	Superbugs are created when a bacterium develops resistance to the antibiotic designed to kill it.
646	The new germ warfare; As many as 22 Canadians die every day from hospital-acquired infections. Carly Weeks reports from the front lines of a fight we cannot lose	http://www.lexisnexis.com/lnacui2api/api/version1/getDocCui?lni=5BDN-R401-JCRP-C2R7&csi=303830&hl=t&hv=t&hnsd=f&hns=t&hgn=t&oc=00240&perma=true	When antibiotics are used inappropriately, they kill susceptible bacteria and create the perfect environment for resistant strains to grow, multiply, mutate and spread.
647	Patients isolated after bacteria outbreak; Attempts to halt spread of drug-resistant bug at New Westminster's Royal Columbian Hospital have failed, officials say	http://www.lexisnexis.com/lnacui2api/api/version1/getDocCui?lni=5BF9-MH71-F06S-34VX&csi=303830&hl=t&hv=t&hnsd=f&hns=t&hgn=t&oc=00240&perma=true	None
648	FOOD SAFETY; Farmers urged to reduce use of antibiotics	http://www.lexisnexis.com/lnacui2api/api/version1/getDocCui?lni=5BWN-SK01-F06S-31J5&csi=303830&hl=t&hv=t&hnsd=f&hns=t&hgn=t&oc=00240&perma=true	"The Government of Canada encourages the prudent use of antimicrobials by all users, including physicians and patients, veterinarians, farmers, and other food producers," Mr. Holub said. "We are committed to working with other governments and with health, pharmaceutical, agriculture, and food sectors to limit and control the emergence and spread of [antimicrobial resistance]
649	FOOD SAFETY; Farmers urged to reduce use of antibiotics	http://www.lexisnexis.com/lnacui2api/api/version1/getDocCui?lni=5BWN-SK01-F06S-31J5&csi=303830&hl=t&hv=t&hnsd=f&hns=t&hgn=t&oc=00240&perma=true	Overuse and misuse of antibiotics in food production are contributing to the rise of multidrug-resistant organisms, which can make some human sicknesses nearly impossible to treat.
650	The Guardian: Antibiotics: agents lose their cutting edge: INSIDE THE NEWS: Most bacteria that live in us and on us are either harmless or actually essential for life. But they mutate all the time, and those that	http://infoweb.newsbank.com/resources/doc/nb/news/0F27DF6823D49732?p=AWNB	Antibiotics also destroy good as well as infectious bacteria, and make a space that can then be colonised by resistant strains. It is all a vivid illustration of evolution in action.
651	The Guardian: Antibiotics: agents lose their cutting edge: INSIDE THE NEWS: Most bacteria that live in us and on us are either harmless or actually essential for life. But they mutate all the time, and those that	http://infoweb.newsbank.com/resources/doc/nb/news/0F27DF6823D49732?p=AWNB	Bacteria can divide every 20 minutes in the right conditions, and their ability to generate genetic variation means that they will continue to develop strains that are resistant.
652	The Guardian: Antibiotics: agents lose their cutting edge: INSIDE THE NEWS: Most bacteria that live in us and on us are either harmless or actually essential for life. But they mutate all the time, and those that	http://infoweb.newsbank.com/resources/doc/nb/news/0F27DF6823D49732?p=AWNB	Most bacteria that live in us and on us are either harmless or actually essential for life. But they mutate all the time, and those that
653	The Guardian: Alarm as superbug hits British hospital	http://infoweb.newsbank.com/resources/doc/nb/news/0F2747FE212A2E0C?p=AWNB	A new variety of TB has evolved to conquer the antibiotics once used to treat it.
654	The Guardian: Alarm as superbug hits British hospital	http://infoweb.newsbank.com/resources/doc/nb/news/0F2747FE212A2E0C?p=AWNB	It is still possible to treat Visa with high doses of the antibiotic, but it is only a matter of time before the bug develops complete resistance.
655	The Guardian: Alarm as superbug hits British hospital	http://infoweb.newsbank.com/resources/doc/nb/news/0F2747FE212A2E0C?p=AWNB	There are serious concerns that another family of bacteria, which has already developed a mutant form completely resistant to vancomycin (although not to other antibiotics), could pass its genes for resistance to the staphylococcus aureus bacterium in a hospital setting.
656	The Guardian: Comment & Analysis: Heads in the ground: Medicine's finest days may soon be over. Even if we stop the routine use of antibiotics on farms now, it is too late to prevent resistant bacteria rendering many modern drugs useless	http://infoweb.newsbank.com/resources/doc/nb/news/0F27486F4A124346?p=AWNB	Resistance is indeed expensive, and some bacteria spend half their energies on it, with long and complicated biochemical pathways that evolution takes years to craft.
657	The Guardian: Comment & Analysis: Heads in the ground: Medicine's finest days may soon be over. Even if we stop the routine use of antibiotics on farms now, it is too late to prevent resistant bacteria rendering many modern drugs useless	http://infoweb.newsbank.com/resources/doc/nb/news/0F27486F4A124346?p=AWNB	Keeping such bugs in culture without the antibiotic means any mutation that removes the pricy resistance is favoured and, quite soon, they lose their defences.
658	The Guardian: March of superbugs 'must be halted': WHO report warns that basic operations could be put at risk	http://infoweb.newsbank.com/resources/doc/nb/news/0F2B371148007CCF?p=AWNB	Further, strains of TB resistant to a whole range of drugs, which had emerged in eastern Europe, Asia and Africa, were now reappearing in patients in western Europe and north America.
659	The Guardian: March of superbugs 'must be halted': WHO report warns that basic operations could be put at risk	http://infoweb.newsbank.com/resources/doc/nb/news/0F2B371148007CCF?p=AWNB	The WHO's report points to the danger that increasing drug resistance among infectious bacteria posed to programmes to reduce the victims of killer diseases, such as pneumonia, TB, malaria and Aids.
660	The Guardian: Science: Zapping superbugs: David Bradley on medicine's latest weapons against bacteria	http://infoweb.newsbank.com/resources/doc/nb/news/0F2B377873AB8A2C?p=AWNB	Even everyday bacteria that live on our skin have evolved into superbugs.
661	The Guardian: Science: Zapping superbugs: David Bradley on medicine's latest weapons against bacteria	http://infoweb.newsbank.com/resources/doc/nb/news/0F2B377873AB8A2C?p=AWNB	Another antibiotic called vancomycin can usually get rid of MRSA but in the last couple of years some hospitals have reported that vancomycin resistance has emerged too.
662	The Guardian: Science: Zapping superbugs: David Bradley on medicine's latest weapons against bacteria	http://infoweb.newsbank.com/resources/doc/nb/news/0F2B377873AB8A2C?p=AWNB	As aminoglycosides are highly toxic, they are not normally given in pill form, but bugs are already developing resistance to those we do use.
663	Wonderdrug' losing war with superbugs	http://infoweb.newsbank.com/resources/doc/nb/news/0F2ADA97D2EAB57F?p=AWNB	All too often resistance has emerged remarkably rapidly.'
664	Wonderdrug' losing war with superbugs	http://infoweb.newsbank.com/resources/doc/nb/news/0F2ADA97D2EAB57F?p=AWNB	It was initially effective in all five patients, but over a period of weeks tests showed that the bacteria were beginning to develop a resistance to the drug
665	The Guardian: Woman is first patient to die from rare superbug	http://infoweb.newsbank.com/resources/doc/nb/news/0F81D9F7C0827B78?p=AWNB	However the MRSA persisted and developed resistance to the vancomycin, thus developing another superbug, known as a Gisa, glycopeptide-intermediate staphylococcus aureus.
666	The Guardian: Superbugs spread to GP surgeries	http://infoweb.newsbank.com/resources/doc/nb/news/0FCDF8166E1BDE83?p=AWNB	But the strains found here may turn out to be home grown - the development follows years in which bacteria have evolved new defences against powerful antibiotics in hospitals, threatening lives of severely ill patients.
667	The Guardian: Superbugs spread to GP surgeries	http://infoweb.newsbank.com/resources/doc/nb/news/0FCDF8166E1BDE83?p=AWNB	It is not exactly clear where the new breed of resistant E coli has emerged from
668	The Guardian: Superbugs spread to GP surgeries	http://infoweb.newsbank.com/resources/doc/nb/news/0FCDF8166E1BDE83?p=AWNB	In parts of the West Midlands and in north Surrey, common bacterial infections appear to have developed such resistance to drugs that a "significant shift" might be happening in patient care.
669	The Guardian: Superbugs spread to GP surgeries	http://infoweb.newsbank.com/resources/doc/nb/news/0FCDF8166E1BDE83?p=AWNB	The increasing number of resistant bugs is partly a result of natural selection, but the process is not being helped by misuse and overuse of antibiotics in treating humans and farm animals, in which the drugs have routinely been used as growth promoters as well as to treat disease.
670	The Guardian: G2: Health: Worried about MRSA?: You should be. More of us are catching it, more of us are dying from it, and now it seems children are the new victims. James Meikle on the march of a killer bug	http://infoweb.newsbank.com/resources/doc/nb/news/1018AF1DC0B8DEBB?p=AWNB	It started developing resistance to penicillin almost as soon as that wonder drug heralded a brave new post-second world war world of antibiotics.
671	The Guardian: University professor pins hope on drug to fight MRSA: Smaller companies and academics plug the research gap	http://infoweb.newsbank.com/resources/doc/nb/news/10C0C9BCFAF552A0?p=AWNB	The battle against bacteria once looked as if it had been won, but the recent emergence of new bugs that cannot be treated with conventional antibiotics has rekindled interest in the area.
672	The Guardian: Concern over failing STD antibiotic	http://infoweb.newsbank.com/resources/doc/nb/news/10C0C9BD4411BF80?p=AWNB	None
673	The Guardian: Drug hope in MRSA fight	http://infoweb.newsbank.com/resources/doc/nb/news/10C512B53AF673B0?p=AWNB	None
674	The Guardian: Science: New class of antibiotic could be effective against superbugs	http://infoweb.newsbank.com/resources/doc/nb/news/111B660743834EA8?p=AWNB	As the use of antibiotics has risen in the past few decades, so has the number of pathogenic bacteria that have developed resistance to them
675	The Guardian: Science: New class of antibiotic could be effective against superbugs	http://infoweb.newsbank.com/resources/doc/nb/news/111B660743834EA8?p=AWNB	But, as bacteria reproduce, their DNA mutates, which can make them immune to the interference of drugs.
676	The Guardian: Doctors running out of antibiotics to fight some infections, say experts: Don't quit less profitable research, drug firms urged Remedies critical for public health, says agency	http://infoweb.newsbank.com/resources/doc/nb/news/12322D26C5AA2648?p=AWNB	Resistance was inevitable, he said. "This is just evolution in real time. It just happens quicker with germs than in rats and humans."
677	The Guardian: Doctors running out of antibiotics to fight some infections, say experts: Don't quit less profitable research, drug firms urged Remedies critical for public health, says agency	http://infoweb.newsbank.com/resources/doc/nb/news/12322D26C5AA2648?p=AWNB	"Fifty years ago, resistance that developed in India stayed in India," he said. "Now it can be here that week."
678	The Guardian: Doctors running out of antibiotics to fight some infections, say experts: Don't quit less profitable research, drug firms urged Remedies critical for public health, says agency	http://infoweb.newsbank.com/resources/doc/nb/news/12322D26C5AA2648?p=AWNB	The last really effective drugs are the carbapanems, but the bacteria are increasingly showing resistance to them.
679	The Guardian: Front: New hospital superbug resistant to antibiotics	http://infoweb.newsbank.com/resources/doc/nb/news/12A13F9144EF36D0?p=AWNB	None
680	The Guardian: G2: →: ←: 'We have a window of maybe 10 years': Antibiotics are a bedrock of modern medicine. But in the very near future, we're going to have to learn to live without them once again. And it's going to get nasty. By Sarah Boseley	http://infoweb.newsbank.com/resources/doc/nb/news/1318E38042261838?p=AWNB	"The emergence of antibiotic resistance is the most eloquent example of Darwin's principle of evolution that there ever was," says Livermore. "It is a war of attrition. It is naive to think we can win."
681	The Guardian: G2: →: ←: 'We have a window of maybe 10 years': Antibiotics are a bedrock of modern medicine. But in the very near future, we're going to have to learn to live without them once again. And it's going to get nasty. By Sarah Boseley	http://infoweb.newsbank.com/resources/doc/nb/news/1318E38042261838?p=AWNB	"This report shows that the battle to control the emergence of antibiotic-resistant superbugs through appropriate use of antibiotics must be fought at an international level," says Kevin Kerr, consultant microbiologist at Harrogate district hospital.
682	The Guardian: G2: →: ←: 'We have a window of maybe 10 years': Antibiotics are a bedrock of modern medicine. But in the very near future, we're going to have to learn to live without them once again. And it's going to get nasty. By Sarah Boseley	http://infoweb.newsbank.com/resources/doc/nb/news/1318E38042261838?p=AWNB	says Walsh, who has been urging co-ordinated efforts across the world to put in place good surveillance systems to find out what resistance is developing and where, and then look for interventions.
683	The Guardian: Comment: The reason why this deadly E coli makes doctors shudder: It is past time for health authorities to curb the antibiotic misuse that created the resistance of this aberrant strain	http://infoweb.newsbank.com/resources/doc/nb/news/137B1B8AC798AFD8?p=AWNB	And that should underline how important it is to slow down the evolution of antibiotic resistance, by cutting back inappropriate use of antibiotics in everyday medicine and on farms.
684	The Guardian: Comment: The reason why this deadly E coli makes doctors shudder: It is past time for health authorities to curb the antibiotic misuse that created the resistance of this aberrant strain	http://infoweb.newsbank.com/resources/doc/nb/news/137B1B8AC798AFD8?p=AWNB	Researchers in Spain and the US say there are links between large-scale agriculture and the emergence of ESBL: they have found bacteria harbouring that resistance in the meat of supermarket chickens.
685	The Guardian: Comment: The reason why this deadly E coli makes doctors shudder: It is past time for health authorities to curb the antibiotic misuse that created the resistance of this aberrant strain	http://infoweb.newsbank.com/resources/doc/nb/news/137B1B8AC798AFD8?p=AWNB	The development of resistance is an inevitable biological process; it's what bacteria do to protect themselves against deadly compounds.
686	The Guardian: Radio review	http://infoweb.newsbank.com/resources/doc/nb/news/13932E78A04060D0?p=AWNB	"Evolution is the driving force of nature. We use antibiotics; we kill sensitive bacteria. Resistant ones survive; they infect further patients."
687	The Guardian: Radio review	http://infoweb.newsbank.com/resources/doc/nb/news/13932E78A04060D0?p=AWNB	Gonorrhoea has mutated to be resistant to some standard treatments, and the world's first completely resistant strain has been found in Japan.
688	The Guardian: Radio review	http://infoweb.newsbank.com/resources/doc/nb/news/13932E78A04060D0?p=AWNB	But it was also one of those science programmes that explains a complicated issue - here, the increasing resistance to antibiotics and possibility of a post-antibiotic world - in terms the lay listener could understand.
689	The Guardian: G2: Health: Dr Dillner's dilemma: Should I avoid taking antibiotics?	http://infoweb.newsbank.com/resources/doc/nb/news/142D1A6350E7E950?p=AWNB	Bacteria can evade destruction through random changes (and there is evidence that even before penicillin was invented some bacteria, through spontaneous mutations, were already resistant to it), or by picking up new genetic material from other bacteria.
690	The Guardian: G2: Health: Dr Dillner's dilemma: Should I avoid taking antibiotics?	http://infoweb.newsbank.com/resources/doc/nb/news/142D1A6350E7E950?p=AWNB	Last week, she warned that bacteria are becoming increasingly resistant to antibiotics.
691	The Guardian: DNA sleuths track down origins of superbug: Scientists trace genesis of infection to US and Canada Research will help fight against killer hospital bug	http://infoweb.newsbank.com/resources/doc/nb/news/1431624584918E40?p=AWNB	"Since these strains acquired resistance to this frontline antibiotic, not only is it now virtually useless against this organism, but resistance seems to have been a major factor in the continued evolution and persistence of these strains in hospitals and clinical settings," said Brendan Wren, a professor at the London School of Hygiene and Tropical Medicine.
692	The Guardian: DNA sleuths track down origins of superbug: Scientists trace genesis of infection to US and Canada Research will help fight against killer hospital bug	http://infoweb.newsbank.com/resources/doc/nb/news/1431624584918E40?p=AWNB	The detailed map of the epidemic shows that two highly virulent strains emerged independently in North America after the pathogens evolved resistance to a frontline antibiotic in wide use at the time.
693	The Guardian: Front: 'Apocalyptic' threat posed by antibiotic resistance	http://infoweb.newsbank.com/resources/doc/nb/news/14408C8896699450?p=AWNB	Another worrying trend is the rise in infections that are resistant to powerful antibiotics called carbapenems, which doctors rely on to tackle the most serious infections.
694	The Guardian: G2: Health: The war against superbugs: Antibiotic-resistant bacteria kill far more people each year globally than terrorism. Why are we losing the battle against them, asks Dr Kevin Fong	http://infoweb.newsbank.com/resources/doc/nb/news/1451ABD9D9332818?p=AWNB	Antibiotics have become drugs that are expensive to develop, which are only used in short courses and which are quickly rendered near obsolete by the evolution of bacterial resistance.
695	The Guardian: G2: Health: The war against superbugs: Antibiotic-resistant bacteria kill far more people each year globally than terrorism. Why are we losing the battle against them, asks Dr Kevin Fong	http://infoweb.newsbank.com/resources/doc/nb/news/1451ABD9D9332818?p=AWNB	Vancomycin Resistant Staphylococcus Aureus (VRSA) emerged in our hospitals.
696	The Guardian: Front: UK raises alarm on superbugs: Calls for clampdown on overuse of antibiotics to limit lethal infections	http://infoweb.newsbank.com/resources/doc/nb/news/146E591149EC5FF0?p=AWNB	Recent studies have shown that the overuse of antibiotics in intensive livestock farming could lead to the evolution of strains of dangerous bacteria
697	The Guardian: Front: UK raises alarm on superbugs: Calls for clampdown on overuse of antibiotics to limit lethal infections	http://infoweb.newsbank.com/resources/doc/nb/news/146E591149EC5FF0?p=AWNB	Willetts will push for a consensus on ways to ramp up the discovery of new drugs to fight bacteria, speed their approval and delivery to patients, and strengthen cross-border surveillance for emerging resistant strains.
698	The Guardian: Front: UK raises alarm on superbugs: Calls for clampdown on overuse of antibiotics to limit lethal infections	http://infoweb.newsbank.com/resources/doc/nb/news/146E591149EC5FF0?p=AWNB	Though improved surveillance and hygiene has reduced levels of life-threatening MRSA and C difficile "superbugs" in hospitals, resistant strains are on the rise.
699	Call for new generation of antibiotics to fight off superbugs - Chief medical officer welcomes prime minister's demand for global action to combat problem	http://infoweb.newsbank.com/resources/doc/nb/news/14ED54AE71D3D430?p=AWNB	The first included natural penicillins. However, this group became ineffective as bacteria evolved enzymes that broke the drugs apart.
700	Call for new generation of antibiotics to fight off superbugs - Chief medical officer welcomes prime minister's demand for global action to combat problem	http://infoweb.newsbank.com/resources/doc/nb/news/14ED54AE71D3D430?p=AWNB	Cameron has described the emergence of untreatable bacteria as one of the biggest health threats facing the world today.
701	Call for new generation of antibiotics to fight off superbugs - Chief medical officer welcomes prime minister's demand for global action to combat problem	http://infoweb.newsbank.com/resources/doc/nb/news/14ED54AE71D3D430?p=AWNB	Cameron, who this month called for immediate action to accelerate the development of drugs for dementia, is said to have raised the problem of antibiotic-resistant superbugs during last year's G7 summit.
702	Docs! Be as wise as microbes	http://infoweb.newsbank.com/resources/doc/nb/news/1157B9F98CEFFB30?p=AWNB	New antibiotics are barely able to keep pace with developing drug resistance.
703	Docs! Be as wise as microbes	http://infoweb.newsbank.com/resources/doc/nb/news/1157B9F98CEFFB30?p=AWNB	On the other hand, as soon as an antibiotic is introduced for treatment in hospital setup, due to selective pressure the bug develops resistance by single or few mutations in their genes and the therapy becomes ineffective," said Dr Mahapatra.
704	Self-medication can be harmful	http://infoweb.newsbank.com/resources/doc/nb/news/130C7277E164C460?p=AWNB	None
705	Basic hygiene works better than drugs - National	http://infoweb.newsbank.com/resources/doc/nb/news/13257EDDAAEF8038?p=AWNB	Simple infections are increasingly becoming difficult to treat and cause longer lasting illnesses and extended hospital stays despite use of expensive and often toxic medication.
706	Super drugs turn super killers, claim more lives than terror	http://infoweb.newsbank.com/resources/doc/nb/news/145214E68A384D70?p=AWNB	For every method of attack, the pharmaceutical companies invent, bacteria rapidly evolve a defence.
707	Super drugs turn super killers, claim more lives than terror	http://infoweb.newsbank.com/resources/doc/nb/news/145214E68A384D70?p=AWNB	Since the first MRSA deaths in otherwise healthy children in the US in 1998, the number of deaths from MRSA infection in the US each year has risen to tens of thousands - outstripping the number of deaths caused by Aids.
708	Super drugs turn super killers, claim more lives than terror	http://infoweb.newsbank.com/resources/doc/nb/news/145214E68A384D70?p=AWNB	New last line drugs emerged to replace the old. We got used to this state of affairs; a steady escalation in the arms race between us and the bacteria.
709	Super drugs turn super killers, claim more lives than terror	http://infoweb.newsbank.com/resources/doc/nb/news/145214E68A384D70?p=AWNB	It is becoming increasingly difficult to develop new drugs active against resistant strains.
710	KILLING BACTERIA WITH WATER AND FRESH AIR	http://infoweb.newsbank.com/resources/doc/nb/news/14C716080C0485D8?p=AWNB	And antibiotics are not being developed fast enough to keep pace with superbugs' ability to develop resistance to them.
711	Antibiotic resistance widespread: WHO	http://infoweb.newsbank.com/resources/doc/nb/news/14D88DF8A348D258?p=AWNB	WHO is also calling attention to the need to develop new diagnostics, antibiotics and other tools to allow healthcare professionals to stay ahead of emerging resistance.
712	Deadly NDM-1 'superbug' raises fears of antibiotic resistance in city hospitals	http://infoweb.newsbank.com/resources/doc/nb/news/150F8D9787784AE0?p=AWNB	Hospitals may soon find it very difficult to treat patients with serious infections as a "superbug," a bacteria that develops resistance to multiple antibiotics, has somehow found its way into the city.
713	Doc urges judicious use of anti-biotics, fast getting drug resistant	http://infoweb.newsbank.com/resources/doc/nb/news/156462275A83B070?p=AWNB	He said that if careful and judicious use of antibiotics was not followed, there would soon be emergence of multi drug resistance microbes,
714	Doc urges judicious use of anti-biotics, fast getting drug resistant	http://infoweb.newsbank.com/resources/doc/nb/news/156462275A83B070?p=AWNB	He said, "ESBL is a sort of enzyme that is secreted by the bacteria after it develops resistance towards some specific antibiotics and therefore that antibiotic does not have any curing effect on the patient.
715	Doc urges judicious use of anti-biotics, fast getting drug resistant	http://infoweb.newsbank.com/resources/doc/nb/news/156462275A83B070?p=AWNB	"A WHO report states that with the fast increasing resistance of bacteria towards antibiotics, within a period of 20-30 years, people would die even due to simple cough and cold," claimed Dr Ankur Gupta
716	PU microbiology profs work at bettering antibiotics	http://infoweb.newsbank.com/resources/doc/nb/news/1564624F7A4A60E8?p=AWNB	Moreover, it was observed that antibiotic resistance was developing rampantly in pathogenic bacteria.
717	Conflict of interest in 'superbug' report: Azad	http://infoweb.newsbank.com/resources/doc/nb/news/15646966514C15D8?p=AWNB	None
718	Self-prescription, overuse of drugs increases resistance risk	http://infoweb.newsbank.com/resources/doc/nb/news/15646972B87C20F8?p=AWNB	The widespread use of antibiotics has played an important role in evolution of the drug resistant bacterium.
719	Self-prescription, overuse of drugs increases resistance risk	http://infoweb.newsbank.com/resources/doc/nb/news/15646972B87C20F8?p=AWNB	It is generally observed that a larger duration of exposure to an antibiotic increases the risk of development of resistance
720	Ministry lacks data on Hospital Acquired Infections	http://infoweb.newsbank.com/resources/doc/nb/news/1564698B9DDDD408?p=AWNB	"Antibiotics are used randomly in India, much like all other parts of the world. While some are underdosed, several others are overdosed. Some drugs don't have the amount of dosage it claims it does. This will automatically give rise to drug resistant organisms.
721	Taiwan puts hospitals on alert against NDM1 superbug	http://infoweb.newsbank.com/resources/doc/nb/news/15646938EEB49E88?p=AWNB	The development of resistance to medicines used to treat malaria, tuberculosis and HIV infection is of particular concern
722	Poultry goods can harm your system	http://infoweb.newsbank.com/resources/doc/nb/news/156469F3216B2148?p=AWNB	The pre-scheduled dose proves ineffective for bacteria and microbes that have already developed resistance in your system.
723	Lancet says sorry for 'Delhi bug'	http://infoweb.newsbank.com/resources/doc/nb/news/1564AF2D19196A40?p=AWNB	Most experts blamed the emergence of this gene on the widespread misuse of antibiotics stating that Indian doctors had not yet taken the issue of antibiotic resistance seriously and that India needed both an improved policy to control the use of antibiotics and a central registry of antibiotic-resistant infections.
724	Concern at misuse of antibiotics	http://infoweb.newsbank.com/resources/doc/nb/news/1564AED777995A48?p=AWNB	"About 80% patients in rural areas are dependent on quacks ," said Ajay Kumar, secretary, Bihar State Health Services Association, at the seminar, adding, "indiscriminate and inadequate use of antibiotics by them is a major concern, and probably this is the major cause of developing antimicrobial resistance in the state."
725	Govt plans to curb overuse of antibiotics	http://infoweb.newsbank.com/resources/doc/nb/news/1564AEE92DD39140?p=AWNB	Repeated and improper uses of antibiotics are primary causes of the increase in drug-resistant bacteria.
726	Caution against pills popping	http://infoweb.newsbank.com/resources/doc/nb/news/1564AEEA5A51E658?p=AWNB	Over dose of antibiotics are likely to develop the super-bugs in the body, he said, adding that there was need to create awareness on the dangers of use of antibiotics without prescriptions."Health activists and ASHA workers, who deal with rural people, should play vital roles in this regard," he said.
727	Caution against pills popping	http://infoweb.newsbank.com/resources/doc/nb/news/1564AEEA5A51E658?p=AWNB	"Antibiotics have to be taken in proper doses. Just popping pills will lead to drug resistance," an expert said at a convention on "Increasing effects of anti-microbial resistance" to mark World Health Day on Thursday.At the same time, the health experts warned pharmacies not to sell antibiotics without prescriptions.
728	Superbug: Brit doctors want ICMR help	http://infoweb.newsbank.com/resources/doc/nb/news/1564AF452D7154D0?p=AWNB	None
729	Now, an antibiotic protocol on cards	http://infoweb.newsbank.com/resources/doc/nb/news/1566FBBB66C14F78?p=AWNB	None
730	Health facilities in Delhi short on essential antibiotics	http://infoweb.newsbank.com/resources/doc/nb/news/1566FBB2F6E27210?p=AWNB	The problem is compounded by the fact that third or fourth generation antibiotics are made available and used in place of basic antibiotics, which could lead to increased resistance.
731	Antibiotics overuse spurring TB, pneumonia'	http://infoweb.newsbank.com/resources/doc/nb/news/1566F93649A7E4B0?p=AWNB	"There is a 50% chance that these people will develop resistance to quinolones. This is alarming as quinolones are used for treatment of TB in India. This rampant misuse is leading to Multi-Drug Resistant (MDR) TB which is a cause of great concern," Dr Mishra said.
732	1/3 of Goa Medical College and Hospital in-patients acquire hospital infections	http://infoweb.newsbank.com/resources/doc/nb/news/156554AB1C67B698?p=AWNB	None
733	Antibiotic prescribing puts patients at risk	http://infoweb.newsbank.com/resources/doc/nb/news/1565547F95128BE8?p=AWNB	None
734	Experts: Self-medication makes antibiotics lose bite	http://infoweb.newsbank.com/resources/doc/nb/news/156553BF430A59D0?p=AWNB	More than half of patients taking to self-medication end up developing drug resistance.
735	WHO declares antibiotic-resistant bacteria ‘a major global threat’	http://infoweb.newsbank.com/resources/doc/nb/news/156553C1E6545120?p=AWNB	None
736	Antibiotic resistance voted as deadliest threat	http://infoweb.newsbank.com/resources/doc/nb/news/156557B9945E33F0?p=AWNB	Clinicians often prescribe broad spectrum antibiotics to sick patients because doctors have to act quickly on imperfect information. These methods put selective pressure on microbes to evolve resistance to antibiotics.
737	Antibiotic resistance voted as deadliest threat	http://infoweb.newsbank.com/resources/doc/nb/news/156557B9945E33F0?p=AWNB	how can we fly without damaging the environment, how can we ensure everyone has nutritious, sustainable food, how can we prevent the rise of resistance to antibiotics, how can we restore movement to those with paralysis
738	Antibiotic resistance voted as deadliest threat	http://infoweb.newsbank.com/resources/doc/nb/news/156557B9945E33F0?p=AWNB	But in the 80 years since the discovery of penicillin, our overuse of antibiotics has put pressure on bacteria to evolve resistance, leading to the emergence of untreatable superbugs that threaten the basis of modern medicine.
739	Over-counter drugs fuel TB threat	http://infoweb.newsbank.com/resources/doc/nb/news/156555662A83F4F8?p=AWNB	Doctors say repeated and wrong use of antibiotics is the main cause of increase in drug-resistant bacteria.
740	CSE's recommendations to control antibiotic use in poultry industry gets support from medical fraternity	http://infoweb.newsbank.com/resources/doc/nb/news/156553EEE9392190?p=AWNB	None
741	Resistance to antibiotics worries child specialists	http://infoweb.newsbank.com/resources/doc/nb/news/156554A433DB1DB0?p=AWNB	The move comes after Indian Academy of Pediatrics, country's apex body of child specialists with 23,000 members, expressed concern over rising antibiotic resistance in children.
742	Resistance to antibiotics worries child specialists	http://infoweb.newsbank.com/resources/doc/nb/news/156554A433DB1DB0?p=AWNB	But a section of child specialists, worried by increasing resistance to most antibiotics, have urged doctors not to prescribe antibiotics to kids for management of common cold, cough and flu.
743	WHO urges coordinated action against antibiotic resistance	http://infoweb.newsbank.com/resources/doc/nb/news/15655595CA7FE978?p=AWNB	We must act urgently. The world is heading for a post-antibiotic era which will be devastating in this age of emerging infectious diseases.
744	The prescribing of antibiotics can be a tricky business	http://infoweb.newsbank.com/resources/doc/nb/news/10B9E087B3A36410?p=AWNB	As the bacteria reproduce, mutations take place. And probability dictates that eventually bacteria will be born that the antibiotic just won't be able to kill
745	Study blames fillings for tougher bacteria	http://infoweb.newsbank.com/resources/doc/nb/news/10BCDBD8A2C108A0?p=AWNB	For 25 years, scientists have been puzzled by why bacteria in people's bodies are increasingly resistant to antibiotic treatment.
746	University to probe effect of antibiotics	http://infoweb.newsbank.com/resources/doc/nb/news/10BC8CEF9E1BF648?p=AWNB	"If we don't study this type of problem in depth, the health of the population that we take for granted now will be severely threatened by the widespread emergence of antibiotic-resistant bacteria," says assistant biochemistry professor Gerry Wright.
747	University to probe effect of antibiotics	http://infoweb.newsbank.com/resources/doc/nb/news/10BC8CEF9E1BF648?p=AWNB	And the bacteria that cause children's ear infections are developing a resistance to antibiotics, he says.
748	University to probe effect of antibiotics	http://infoweb.newsbank.com/resources/doc/nb/news/10BC8CEF9E1BF648?p=AWNB	McMaster University has launched a $2.4 million research project that will investigate the body's increasing resistance to antibiotics.
749	Scientists are looking for new ways to outsmart drug-resistant bacteria that have become a ... Deadly force	http://infoweb.newsbank.com/resources/doc/nb/news/10BC3192D1826C00?p=AWNB	Synphar's president, Dr. Ronald Micetich, says some bacteria become drug-resistant by developing a new enzyme that blocks the antibiotic.
750	Scientists are looking for new ways to outsmart drug-resistant bacteria that have become a ... Deadly force	http://infoweb.newsbank.com/resources/doc/nb/news/10BC3192D1826C00?p=AWNB	The antibiotics aren't working partly due to a combination of overuse, misuse and the ability of bacteria to mutate.
751	A looming antibiotic 'apocalypse' It's possible to return to the death rates common before the use of penicillin	http://infoweb.newsbank.com/resources/doc/nb/news/10BC81EB88F76518?p=AWNB	Strains of resistant microbes have evolved for virtually every disease ever treated with antibiotics, from malaria to the common urinary tract infection.
752	A looming antibiotic 'apocalypse' It's possible to return to the death rates common before the use of penicillin	http://infoweb.newsbank.com/resources/doc/nb/news/10BC81EB88F76518?p=AWNB	"We're now seeing the resurgence of old infections and the emergence of new diseases," he said.
753	A looming antibiotic 'apocalypse' It's possible to return to the death rates common before the use of penicillin	http://infoweb.newsbank.com/resources/doc/nb/news/10BC81EB88F76518?p=AWNB	So far, doctors in Canada are managing to cope since they have a wide variety of drugs at their disposal. They can try one or another until they find a mix for which the microbe they're targeting hasn't yet developed a resistance.
754	A looming antibiotic 'apocalypse' It's possible to return to the death rates common before the use of penicillin	http://infoweb.newsbank.com/resources/doc/nb/news/10BC81EB88F76518?p=AWNB	Levy, of Tufts University, described the rise of antibiotic resistant disease as a "time bomb" in the Third World.
755	Acne starts resisting antibiotics	http://infoweb.newsbank.com/resources/doc/nb/news/10BBF4C149E003E0?p=AWNB	Several recent studies show that some acne-causing bacteria have developed strains that resist both topical and oral antibiotics.
756	No antibiotics for flu, experts say They fear rise in drug-resistant bacteria strains	http://infoweb.newsbank.com/resources/doc/nb/news/10BA4C9EEACE5408?p=AWNB	The resulting overuse of antibiotics has prompted the rise of drug-resistant bacteria.
757	Drug-beating germ may be unstoppable U.S. doctors fear	http://infoweb.newsbank.com/resources/doc/nb/news/10BBE250B19DCC28?p=AWNB	None
758	Tough new bacteria worry MDs	http://infoweb.newsbank.com/resources/doc/nb/news/10BBE26314760598?p=AWNB	The 200 doctors, scientists, hospital staff, nursing home officials, bureaucrats and drug company experts gathered for the Montreal meeting were told such a drug-beating superbug appears to be evolving in Japa
759	Tough new bacteria worry MDs	http://infoweb.newsbank.com/resources/doc/nb/news/10BBE26314760598?p=AWNB	The Montreal gathering, organized by Health Canada and the Canadian Infectious Disease Society, is meant to produce specific recommendations on monitoring the rise of drug-resistant bugs and on curbing their power through wiser use of antibiotics.
760	No quick victory in this war	http://infoweb.newsbank.com/resources/doc/nb/news/10BA8424AB02A2A8?p=AWNB	In addition, the genes that encode these defences are carried on small, easily portable loops of DNA, meaning that once one kind of bacteria evolves them, the genes can be - and most definitely are - passed on to other kinds. That's why the appearance of antibiotic resistance in even totally harmless bacteria is greeted with dismay.
761	No quick victory in this war	http://infoweb.newsbank.com/resources/doc/nb/news/10BA8424AB02A2A8?p=AWNB	Sometimes it only takes a few weeks for some bacteria to develop resistance to a new antibiotic.
762	Drug-smart germs targeting children	http://infoweb.newsbank.com/resources/doc/nb/news/10BBD636282DA118?p=AWNB	None
763	Superbugs pose new health challenges	http://infoweb.newsbank.com/resources/doc/nb/news/10BBDA3C55260C18?p=AWNB	The emergence of superbugs - infections able to resist antibiotics or even be immune to them - pushes this question to the forefront.
764	Reduce the use of antibiotics, study urges - Drugs are fast becoming ineffective, researchers find	http://infoweb.newsbank.com/resources/doc/nb/news/10BB9A8F082D8950?p=AWNB	Doctors and health officials are worried about the rise of antibiotic-resistant bacteria.
765	Reduce the use of antibiotics, study urges - Drugs are fast becoming ineffective, researchers find	http://infoweb.newsbank.com/resources/doc/nb/news/10BB9A8F082D8950?p=AWNB	"What has been fascinating is that since we saw this problem, not only has the rate of resistance increased, quite dramatically, but also how resistant these bacteria are.
766	U.S. approves drug against 'super' bacteria	http://infoweb.newsbank.com/resources/doc/nb/news/10BB97CA3A142618?p=AWNB	Synercid comes at a critical time, as more germs develop resistance to that "silver bullet" antibiotic, vancomycin, leaving doctors helpless as patients die from once-treatable infections
767	Antibiotics no longer working, doctors warn - Overuse of drugs makes 'bugs' real threat, WHO says	http://infoweb.newsbank.com/resources/doc/nb/news/10BA9CB4F8744928?p=AWNB	http://infoweb.newsbank.com/resources/doc/nb/news/10BA9CB4F8744928?p=AWNB
768	New computer system to keep tabs on superbugs - Resistance to antibiotics keeps growing	http://infoweb.newsbank.com/resources/doc/nb/news/10BB8CC78EE176A8?p=AWNB	"If we ever hope to be able to deal with the problem, to limit its extent or to prevent emergence of resistance, we need surveillance systems to track resistant organisms," said Dr. Andrew Simor, chief of microbiology and an infectious disease consultant at Sunnybrook and Women's College Health Sciences Centre.
769	1,000 people sought in TB scare - Had contact with two Hamilton residents infected with disease	http://infoweb.newsbank.com/resources/doc/nb/news/10BAA11AD649CF80?p=AWNB	None
770	Superbug costs $50 million a year, study finds	http://infoweb.newsbank.com/resources/doc/nb/news/10B7FA997245EB38?p=AWNB	The antibiotic used to treat staph is usually methicillin, but, since some bacteria has developed a resistance, doctors are sometimes forced to a second line of treatment, the intravenous antibiotic vancomycin.
771	E. coli probed in five seniors' deaths	http://infoweb.newsbank.com/resources/doc/nb/news/10B83A4AB1E748A8?p=AWNB	This "new" strain is a variation of a common bacterium found in the digestive tract that has developed a resistance to antibiotics, Reynolds said.
772	Superbug resists toughest antibiotic	http://infoweb.newsbank.com/resources/doc/nb/news/10B93F4519190898?p=AWNB	Penicillin is now nearly useless against staph aureus. Overuse has fuelled resistance, a process in which the rapidly evolving bug learns how to evade the drug's firepower.
773	Superbug resists toughest antibiotic	http://infoweb.newsbank.com/resources/doc/nb/news/10B93F4519190898?p=AWNB	Experts and organizations such as the Centers for Disease Control have been on the lookout for the development of a strain of staph aureus that is resistant to vancomycin.
774	Superbugs and nightmare scenarios - Resistance to antibiotics grows	http://infoweb.newsbank.com/resources/doc/nb/news/10B9408A26125A68?p=AWNB	But it has been playing catch-up ever since. Resistance, it's now known, will always emerge.
775	Superbugs and nightmare scenarios - Resistance to antibiotics grows	http://infoweb.newsbank.com/resources/doc/nb/news/10B9408A26125A68?p=AWNB	Scientists are using gene-sequencing technology to understand the varying processes by which microbes develop resistance and transmit it, even to other bacterial species.
776	Superbugs and nightmare scenarios - Resistance to antibiotics grows	http://infoweb.newsbank.com/resources/doc/nb/news/10B9408A26125A68?p=AWNB	"But there's no question we have a problem with increasing resistance to larger numbers of infections."
777	Staph bug grows drug resistant	http://infoweb.newsbank.com/resources/doc/nb/news/10C7C3D6838317F8?p=AWNB	U.S. health officials warned yesterday that a common microbe found on the skin or nasal passages of one-third of Americans had developed resistance to the antibiotic usually prescribed to kill it.
778	Hold the pickles, and the antibiotics	http://infoweb.newsbank.com/resources/doc/nb/news/10C7C867EE314D58?p=AWNB	Antibiotics wipe out most of their target bacteria on first use, but the few that survive begin an evolutionary process toward drug resistance. They may become more virulent in the process.
779	Hold the pickles, and the antibiotics	http://infoweb.newsbank.com/resources/doc/nb/news/10C7C867EE314D58?p=AWNB	When humans eat animals that have been regularly fed antibiotics, bacteria in the humans tend over time to develop immunity to the antibiotics.
780	Goodbye, antibiotics - Antibiotic resistance appears to be so unstoppable that we need to develop new ways to fight and prevent infections	http://infoweb.newsbank.com/resources/doc/nb/news/138955FB376DF4E8?p=AWNB	And now, with the news last week that a strain of gonorrhea has evolved to be completely untreatable, the future of antibiotics may be as grim as the Titanic.
781	Goodbye, antibiotics - Antibiotic resistance appears to be so unstoppable that we need to develop new ways to fight and prevent infections	http://infoweb.newsbank.com/resources/doc/nb/news/138955FB376DF4E8?p=AWNB	Instead, resistance was a natural phenomenon in which bacteria developed tolerance to non-lethal concentrations of the antibiotic,
782	Goodbye, antibiotics - Antibiotic resistance appears to be so unstoppable that we need to develop new ways to fight and prevent infections	http://infoweb.newsbank.com/resources/doc/nb/news/138955FB376DF4E8?p=AWNB	With extended exposure through contamination or improper dosing, resistance could be increased to render even higher concentrations of the drug ineffective.
783	Gonorrhea makes dangerous comeback	http://infoweb.newsbank.com/resources/doc/nb/news/13F43486780B6D68?p=AWNB	"This organism has basically been developing resistance against every medication we've thrown at it," said Dr. Manjula Lusti-Narasimhan, a scientist in the agency's department of sexually transmitted diseases.
784	Antibiotic apocalypse - The next 'nightmare' superbug could have deadly consequences as resistance to once-potent drugs grows	http://infoweb.newsbank.com/resources/doc/nb/news/145EFB8CCB162280?p=AWNB	Over billions of years, bacteria evolved defensive strategies: they can pump the antibiotic out, inactivate it, or even mutate themselves so the antibiotic no longer works.
785	Antibiotic apocalypse - The next 'nightmare' superbug could have deadly consequences as resistance to once-potent drugs grows	http://infoweb.newsbank.com/resources/doc/nb/news/145EFB8CCB162280?p=AWNB	So, when bacteria find places to mingle - say, in a sewage plant, hospital or a person's gut - they could all emerge resistant.
786	Antibiotic apocalypse - The next 'nightmare' superbug could have deadly consequences as resistance to once-potent drugs grows	http://infoweb.newsbank.com/resources/doc/nb/news/145EFB8CCB162280?p=AWNB	Over billions of years, bacteria evolved defensive strategies: they can pump the antibiotic out, inactivate it, or even mutate themselves so the antibiotic no longer works.
787	Superbug' bacteria widespread in U.S. chicken - Consumer Reports urges passage of a law to restrict eight classes of antibiotics	http://infoweb.newsbank.com/resources/doc/nb/news/14AD1B5F6FA7FB50?p=AWNB	none
788	Simple path to stopping drug-resistant bacteria	http://infoweb.newsbank.com/resources/doc/nb/news/150C07A95B4DE9F8?p=AWNB	none
789	Antibiotic misuse breeds superbugs	http://infoweb.newsbank.com/resources/doc/nb/news/0EB77284D762B4C8?p=AWNB	Doctors warn that such misuse is partly to blame for the evolution of superbugs - bacteria that don't respond to a widening array of drugs.
790	Antibiotic misuse breeds superbugs	http://infoweb.newsbank.com/resources/doc/nb/news/0EB77284D762B4C8?p=AWNB	"If an antibiotic is prescribed for 10 days and the patient stops taking it after three or four days, that may allow for the emergence of resistant organisms," says Wiedemann.
791	Incidence of drug-resistant bacteria soars since '94	http://infoweb.newsbank.com/resources/doc/nb/news/0EB773001FB7D870?p=AWNB	none
792	Restricting antibiotics to revive their value	http://infoweb.newsbank.com/resources/doc/nb/news/0EB773103A2FBAEF?p=AWNB	Years of over-prescribing antibiotics has led to a dangerous increase in drug-resistant bacteria, but a Finnish study shows that when hospitals cut back on antibiotic use, drug resistance drops significantly
793	U.S. warns of germ that resists drugs	http://infoweb.newsbank.com/resources/doc/nb/news/0EB77311587CCEF5?p=AWNB	A deadly microbe that has developed resistance to the last of the antibiotics readily capable of killing it has turned up in a Michigan man, health officials warned Thursday.
794	Patients found to be infected by bacteria resistant to strongest antibiotics	http://infoweb.newsbank.com/resources/doc/nb/news/127E2BA25AE18BC8?p=AWNB	The fact that strains of Staphyloccus aureus -- the bacteria with which both patients were infected -- have become partially resistant to vancomycin suggests that strains with complete resistance to the drug may emerge, the CDC said in its Morbidity and Mortality Weekly Report.
795	Patients found to be infected by bacteria resistant to strongest antibiotics	http://infoweb.newsbank.com/resources/doc/nb/news/127E2BA25AE18BC8?p=AWNB	The CDC believes that the resistance developed within the patients' bodies and was not introduced from outside.
796	The evolution of infections	http://infoweb.newsbank.com/resources/doc/nb/news/0EB77317A9E9949D?p=AWNB	The evolution of infections
797	The evolution of infections	http://infoweb.newsbank.com/resources/doc/nb/news/0EB77317A9E9949D?p=AWNB	Emerging infections, antibiotic resistance and new treatments are the focus of a meeting of scientists here this week.
798	Antibiotic losing urinary-infection battle	http://infoweb.newsbank.com/resources/doc/nb/news/0EB773938D97B927?p=AWNB	Antibiotic resistance varies from place to place, Gupta notes, but ''it's probably reasonable to assume that resistance is increasing in most places just because Bactrim is used so commonly.''
799	Health departments cannot track drug-resistant disease, report says	http://infoweb.newsbank.com/resources/doc/nb/news/127D8701548B8580?p=AWNB	The Clinton administration has asked for an additional $65 million in the 2000 budget to develop a more sophisticated surveillance network, Satcher said - $40 million for possible biological weapons attacks, $15 million for emerging infectious diseases (that includes antibiotic-resistant disease), and $10 million for foodborne illness.
800	Health departments cannot track drug-resistant disease, report says	http://infoweb.newsbank.com/resources/doc/nb/news/127D8701548B8580?p=AWNB	Doctors are most worried about a virulent bacteria that is developing resistance to even the strongest of antibiotics; five cases of Staphylococcus aureus partially resistant to vancomycin have been found in severely ill patients, three in the United States, one in Japan and the most recent in Hong Kong.
801	FDA urged to ban agricultural antibiotic use	http://infoweb.newsbank.com/resources/doc/nb/news/127D892A5B9DCB30?p=AWNB	The council issued a statement noting that eight studies since 1969 have failed to establish a conclusive link between agricultural use of antibiotics and the increase in resistance by bacteria in humans to the drugs.
802	Like a resistant strain, the debate won't go away	http://infoweb.newsbank.com/resources/doc/nb/news/0EB773AC00758917?p=AWNB	In time, strains of bacteria emerge with the trait that allows them to resist the antibiotic's effects, and they can infect new hosts, whether human or animal.
803	Like a resistant strain, the debate won't go away	http://infoweb.newsbank.com/resources/doc/nb/news/0EB773AC00758917?p=AWNB	Recent articles in medical journals have reported the emergence of antibiotic-resistant strains of foodborne bacteria, including salmonella, campylobacter and E. coli, all of which cause intestinal infections in humans.
804	Garden shrub may help snip out hospital infections	http://infoweb.newsbank.com/resources/doc/nb/news/0EB773EB15628D50?p=AWNB	Staph aureus is a common bacterium in hospitals and has developed resistance to antibiotics in recent years, causing infections that are difficult and expensive to treat.
805	Garden shrub may help snip out hospital infections	http://infoweb.newsbank.com/resources/doc/nb/news/0EB773EB15628D50?p=AWNB	Researchers say they have found a combination of compounds in a common plant that could be used to thwart drug resistance in bacteria increasingly impervious to antibiotics.
806	Antibiotic misuse invites global disaster, WHO warns	http://infoweb.newsbank.com/resources/doc/nb/news/0EB77405C73EBB9E?p=AWNB	Microbes evolve to survive antibiotics.
807	Drug-resistant diseases becoming worldwide public health issue	http://infoweb.newsbank.com/resources/doc/nb/news/127D6E06CB51E748?p=AWNB	Thompson said preventing the emergence of new resistant organisms will depend on changing health-care providers' use of antibiotics. That will require educating both them and their patients.
808	Drug-resistant diseases becoming worldwide public health issue	http://infoweb.newsbank.com/resources/doc/nb/news/127D6E06CB51E748?p=AWNB	"Our extensive use of antimicrobial drugs as well as the remarkable ability of microbes to mutate and develop resistance threatens to return us to the situation we had in the early 1900s where common infections were often lethal," Cochran said.
809	Drug-resistant diseases becoming worldwide public health issue	http://infoweb.newsbank.com/resources/doc/nb/news/127D6E06CB51E748?p=AWNB	These organisms develop and grow stronger if medications are used when they are not needed, such as in the United States, or only partially used, such as with antibiotics in poorer nations.
810	Drug-resistant diseases becoming worldwide public health issue	http://infoweb.newsbank.com/resources/doc/nb/news/127D6E06CB51E748?p=AWNB	diseases are becoming increasingly deadly as once-invincible pharmaceuticals lose their ability to kill microbes.
811	Drug-resistant diseases becoming worldwide public health issue	http://infoweb.newsbank.com/resources/doc/nb/news/127D6E06CB51E748?p=AWNB	Dr. Jeffrey P. Koplan, director of the Centers for Disease Control and Prevention in Atlanta, said recent increases in drug-resistant microbes are cause for "serious concern but not pessimism"
812	Drug-resistant diseases becoming worldwide public health issue	http://infoweb.newsbank.com/resources/doc/nb/news/127D6E06CB51E748?p=AWNB	The problem has concerned public health officials for years as evidence mounted that bacteria, viruses and parasites were mutating quickly into a form resistant to today's drugs.
813	Blame livestock antibiotics for infections	http://infoweb.newsbank.com/resources/doc/nb/news/0EF180D0D135452E?p=AWNB	none
814	New, growing threat: Resistance to Cipro antibiotic	http://infoweb.newsbank.com/resources/doc/nb/news/0EF5CC1150859A0C?p=AWNB	But with use of drugs, especially in cases where patients fail to take them long enough to fully eliminate the infection, bacteria develop resistance to antibiotics.
815	New, growing threat: Resistance to Cipro antibiotic	http://infoweb.newsbank.com/resources/doc/nb/news/0EF5CC1150859A0C?p=AWNB	*Mutations. Random changes in bacteria's genes may allow them to evade a drug's effects. Descendants of bacteria out-compete their weak peers and spread widely.
816	Microbes eat away at antibiotics	http://infoweb.newsbank.com/resources/doc/nb/news/0F662F202084B7D1?p=AWNB	As bacteria evolve resistance to more classes of antibiotics, drug companies are racing to create new ones.
817	Microbes eat away at antibiotics	http://infoweb.newsbank.com/resources/doc/nb/news/0F662F202084B7D1?p=AWNB	* Resistance to fluoroquinolones, a newer class of drugs, also is on the rise
818	Microbes eat away at antibiotics	http://infoweb.newsbank.com/resources/doc/nb/news/0F662F202084B7D1?p=AWNB	"If we use antibiotics, some level of antibiotic resistance will emerge," Doern says.
819	Microbes eat away at antibiotics	http://infoweb.newsbank.com/resources/doc/nb/news/0F662F202084B7D1?p=AWNB	"We are living in a time where increasing drug resistance is frustrating treatment of common infections," says Roger Finch, professor of infectious diseases at England's University of Nottingham.
820	Cut antibiotic use in food animals	http://infoweb.newsbank.com/resources/doc/nb/news/0FC31B68E11316C9?p=AWNB	In fact, the bacteria we ingest in tainted food -- organisms such as salmonella, campylobacter and E. coli -- are increasingly impervious to once-standard treatments such as penicillin and tetracycline.
821	Number of drug-resistant germs on the rise - Doctors unable to keep up	http://infoweb.newsbank.com/resources/doc/nb/news/11E5EAC2E5E9F690?p=AWNB	Number of drug-resistant germs on the rise
822	Gonorrhea mutates to resist antibiotic treatment - Development is 'a public health wake-up call,' CDC official warns	http://infoweb.newsbank.com/resources/doc/nb/news/11E5E99AD6A9E910?p=AWNB	Apparently, Douglas said, it's easier for bacteria to mutate and resist fluoroquinolones than it is for them to become resistant to cephalosporins.
823	FDA vs. antibiotics for animal growth	http://infoweb.newsbank.com/resources/doc/nb/news/130A9840506AD9B0?p=AWNB	"Because bacteria are so good at becoming resistant to antimicrobial drugs, it is essential that such drugs be used judiciously to delay the development of resistance," says Joshua Sharfstein, the FDA's principal deputy commissioner of food and drugs.
824	Southeast paying health price for high antibiotic use	http://infoweb.newsbank.com/resources/doc/nb/news/142903E2D5900500?p=AWNB	none
825	CDC sounds alarm on deadly, untreatable superbugs	http://infoweb.newsbank.com/resources/doc/nb/news/144E40EDEFCCA220?p=AWNB	"Excessive antibiotic use combined with failure of health care workers to wash hands before and after caring for patients allows these bugs to develop and spread."
826	Antibiotic overuse threat 'urgent' - CDC: 2 million infections, 23,000 deaths each year	http://infoweb.newsbank.com/resources/doc/nb/news/148E01974DAA0C00?p=AWNB	none
827	Salmonella shows drug resistance - Latest outbreak in the West puts many in hospital	http://infoweb.newsbank.com/resources/doc/nb/news/1495429F8F49DD38?p=AWNB	none
828	FDA targets antibiotics in meat	http://infoweb.newsbank.com/resources/doc/nb/news/14AA8A9521A39A50?p=AWNB	Decades of scientific research has linked the overuse and misuse of antibiotics in food animals to rising antibiotic resistance in human pathogens.
829	Fight 'superburg' threat by limiting antibiotics	http://infoweb.newsbank.com/resources/doc/nb/news/14DA53FFB74988B0?p=AWNB	none
830	Next pandemic' could be man-made - CDC warns about growing threat of antibiotic resistance	http://infoweb.newsbank.com/resources/doc/nb/news/14F3DAA2F83023D8?p=AWNB	The bugs are always evolving, even when the medicines are not.
831	Next pandemic' could be man-made - CDC warns about growing threat of antibiotic resistance	http://infoweb.newsbank.com/resources/doc/nb/news/14F3DAA2F83023D8?p=AWNB	However, their common use has caused some bacteria to mutate and become resistant to these drugs, according to the CDC.
832	New Meat-Packing Plant Tests Are Meant To Curb Harmful Drug Levels in Livestock	http://search.proquest.com/wallstreetjournal/docview/134948896/fulltextPDF?accountid=14512	none
833	Researchers report more patients ill with bacterium resistant to antibiotics	http://search.proquest.com/wallstreetjournal/docview/398561978/fulltext/B9783CC047B4413CPQ/43?accountid=14512	Drug-resistant strains emerge when a few bacteria develop a drug-resistant mutation and survive an exposure to an antibiotic, such as penicillin.
834	Researchers report more patients ill with bacterium resistant to antibiotics	http://search.proquest.com/wallstreetjournal/docview/398561978/fulltext/B9783CC047B4413CPQ/43?accountid=14513	Epidemic researchers reported that the number of patients infected with an antibiotic-resistant strain of Streptococcus pneumoniae, a potentially deadly bacterium, is rising at an alarming rate.
835	Researchers report more patients ill with bacterium resistant to antibiotics	http://search.proquest.com/wallstreetjournal/docview/398561978/fulltext/B9783CC047B4413CPQ/43?accountid=14514	The mutant bacteria multiply and pass on their resistant gene to their offspring.
836	Germ Fighter in Household Products Is Found to Generate Resistant Strains	http://search.proquest.com/wallstreetjournal/docview/398628036/fulltext/B9783CC047B4413CPQ/70?accountid=14512	"Clinical studies with Total conducted over a prolonged period under real world conditions demonstrated that oral bacteria did not develop resistance to triclosan," said spokesman Bob Murray.
837	Germ Fighter in Household Products Is Found to Generate Resistant Strains	http://search.proquest.com/wallstreetjournal/docview/398628036/fulltext/B9783CC047B4413CPQ/70?accountid=14513	Previously, companies had maintained that triclosan would chemically dissolve bacterial membranes, and wouldn't be susceptible to genetic mutations in bacteria
838	FDA Approves Rhone-Poulenc Superbug Drug	http://search.proquest.com/wallstreetjournal/docview/398731410/fulltext/B9783CC047B4413CPQ/86?accountid=14512	In approving the drug, the FDA pointed to the "rapid increase" in infections associated with vancomycin-resistant Enterococcus faecium bacteremia -- or infections that are resistant to what had been the drug of last resort, vancomycin.
839	As Bacteria Outsmart Old Antibiotics, Drug Makers Ready New Arsenal	http://search.proquest.com/wallstreetjournal/docview/398729960/fulltext/B9783CC047B4413CPQ/87?accountid=14512	But by this time, the new wave of resistant bugs was emerging and the Upjohn scientists decided to try to build on DuPont's discovery.
840	As Bacteria Outsmart Old Antibiotics, Drug Makers Ready New Arsenal	http://search.proquest.com/wallstreetjournal/docview/398729960/fulltext/B9783CC047B4413CPQ/87?accountid=14513	Since the early 1990s, tens of thousands of patients -- many of whom are among a hospital's most severely ill or are recovering from surgery -- have been infected by mutant forms of life-threatening bacterial germs that have developed an ability to evade all existing drugs.
841	As Bacteria Outsmart Old Antibiotics, Drug Makers Ready New Arsenal	http://search.proquest.com/wallstreetjournal/docview/398729960/fulltext/B9783CC047B4413CPQ/87?accountid=14514	As these bacteria have come under heavy assault from existing drugs, the microbes have mutated into forms that have built up defenses to the antibiotics.
842	As Bacteria Outsmart Old Antibiotics, Drug Makers Ready New Arsenal	http://search.proquest.com/wallstreetjournal/docview/398729960/fulltext/B9783CC047B4413CPQ/87?accountid=14515	SAN FRANCISCO -- The drug industry is making gains in the race to develop "super-antibiotics," a new wave of weapons against the rising tide of medicine-resistant bugs.
843	It's Getting Harder To Fight Those Bugs That Ruin Vacations	http://search.proquest.com/wallstreetjournal/docview/398688695/fulltext/B9783CC047B4413CPQ/93?accountid=14512	What's worse, bugs are evolving new patterns of resistance to many popular antibiotics.
844	It's Getting Harder To Fight Those Bugs That Ruin Vacations	http://search.proquest.com/wallstreetjournal/docview/398688695/fulltext/B9783CC047B4413CPQ/93?accountid=14513	In the U.S., too, Campylobacter resistance is rapidly rising to about 17% in 1999 from 10% in 1998, says Minnesota's Dr. Smith
845	Overprescribing Warning May Appear on Antibiotics	http://search.proquest.com/wallstreetjournal/docview/398869849/fulltext/B9783CC047B4413CPQ/103?accountid=14512	The more the bacteria are exposed to the drugs, the more likely they will develop resistance and make diseases more difficult -- if not impossible -- to treat.
846	FDA May Ban Drugs Of Bayer and Abbott Used to Treat Poultry	http://search.proquest.com/wallstreetjournal/docview/398706680/fulltext/B9783CC047B4413CPQ/105?accountid=14512	Federal regulators are taking a tough new look at the link between antibiotics given to farm animals and the increasing resistance of a number of human diseases to drugs.
847	Drug-Resistant SalmonellaEmerges, Researchers Say	http://search.proquest.com/wallstreetjournal/docview/398728531/fulltext/B9783CC047B4413CPQ/107?accountid=14512	The researchers said the findings illustrate the need to reduce overuse of antibiotics in livestock and humans, which is thought to contribute to the emergence of drug-resistant germs.
848	Perdue Will Stop Using Antibiotic Linked To Resistant Bacteria	http://search.proquest.com/wallstreetjournal/docview/398769036/C1B578A4F8964D83PQ/132?accountid=14512	none
849	Potential Ally Against Anthrax Emerges in Lab	http://search.proquest.com/wallstreetjournal/docview/399016556/C1B578A4F8964D83PQ/143?accountid=14512	SCIENTISTS HAVE taken the first steps toward fighting anthrax, streptococcus and other infectious bacteria with virus-produced enzymes, exploding the targeted microbes without apparent side effects or encouraging the evolution of drug-resistant strains.
850	Potential Ally Against Anthrax Emerges in Lab	http://search.proquest.com/wallstreetjournal/docview/399016556/C1B578A4F8964D83PQ/143?accountid=14513	Use of PlyG didn't seem to lead to resistance in the RSVF1 strain, even when the researchers added chemicals designed to produce a wide variety of mutant bacteria, which would increase the chance of yielding a resistant type. In the same experiment, resistance to the antibiotics novobiocin and streptomycin jumped by more than 1,000 times.
851	Potential Ally Against Anthrax Emerges in Lab	http://search.proquest.com/wallstreetjournal/docview/399016556/C1B578A4F8964D83PQ/143?accountid=14514	Today, with drug resistance on the rise, several U.S. start-ups have returned attention to phages as possible therapies.
852	Drug-Resistant Bacteria Cases No Longer Are Just in Hospitals	http://search.proquest.com/wallstreetjournal/docview/398846752/C1B578A4F8964D83PQ/148?accountid=14512	none
853	Caution Is Prescribed for Antibiotics; U.S. Agency Moves to Urge Doctors and Patients to Use Treatments in Moderation	http://search.proquest.com/wallstreetjournal/docview/398889238/C1B578A4F8964D83PQ/157?accountid=14512	none
854	The Informed Patient: Healthy People Are At Growing Risk From Staph Infections	http://search.proquest.com/wallstreetjournal/docview/398973812/C1B578A4F8964D83PQ/159?accountid=14512	But drug-resistant infections are suddenly emerging beyond hospital walls -- spreading among families, toddlers in day-care centers and school sports teams.
855	The Informed Patient: Healthy People Are At Growing Risk From Staph Infections	http://search.proquest.com/wallstreetjournal/docview/398973812/C1B578A4F8964D83PQ/159?accountid=14513	It's likely to get worse: Antibiotic resistance is developing quickly, while investment by pharmaceutical companies in more powerful drugs to counter infections is on the decline.
856	The Informed Patient: Healthy People Are At Growing Risk From Staph Infections	http://search.proquest.com/wallstreetjournal/docview/398973812/C1B578A4F8964D83PQ/159?accountid=14514	"Antibiotic resistance is increasing too quickly and in too many organisms," says Jonathan Finkelstein, the pediatric infectious disease specialist who helped carry out the Massachusetts study.
857	The Informed Patient: Healthy People Are At Growing Risk From Staph Infections	http://search.proquest.com/wallstreetjournal/docview/398973812/C1B578A4F8964D83PQ/159?accountid=14515	Doctors and scientists say overuse of antibiotics is a culprit in all drug-resistant infections. But they are unsure why the community- acquired infections are suddenly so sharply on the rise.
858	Groups Urge FDA to Curb Animal-Feed Antibiotics	http://search.proquest.com/wallstreetjournal/docview/398979888/C1B578A4F8964D83PQ/181?accountid=14512	The concern is that bacteria that aren't completely killed off by an antibiotic can mutate and become resistant to it.
859	Silent Epidemic: Defying Treatment, A New, Virulent Bug Sparks Health Fears; Drug-Resistant Staph Kills Quickly and Randomly; Antibiotics' Worrying Toll; Simon Sparrow Wakes Crying	http://search.proquest.com/wallstreetjournal/docview/398990307/C1B578A4F8964D83PQ/200?accountid=14512	Drug- resistant forms emerged decades ago in hospitals, where only those most impervious to treatment survive.
860	Silent Epidemic: Defying Treatment, A New, Virulent Bug Sparks Health Fears; Drug-Resistant Staph Kills Quickly and Randomly; Antibiotics' Worrying Toll; Simon Sparrow Wakes Crying	http://search.proquest.com/wallstreetjournal/docview/398990307/C1B578A4F8964D83PQ/200?accountid=14513	Its officials say the rapidly developing disease couldn't have been detected any sooner.
861	Silent Epidemic: Defying Treatment, A New, Virulent Bug Sparks Health Fears; Drug-Resistant Staph Kills Quickly and Randomly; Antibiotics' Worrying Toll; Simon Sparrow Wakes Crying	http://search.proquest.com/wallstreetjournal/docview/398990307/C1B578A4F8964D83PQ/200?accountid=14514	Doctors have long prescribed popular drugs such as Keflex and Cipro to combat staph, which some feel may have contributed to the rise of the drug-resistant type.
862	Drug-Resistant Staph Bacteria Seem to Be Widespread in U.S.	http://search.proquest.com/wallstreetjournal/docview/399021801/C1B578A4F8964D83PQ/207?accountid=14512	none
863	Resistance of Superbug Grows; New MRSA Strain Hits Communities Of Gay Men Hardest	http://search.proquest.com/wallstreetjournal/docview/399019089/F38102464A914E41PQ/224?accountid=14512	none
864	The Informed Patient: 'Superbugs' That Strike the Sickest Patients	http://search.proquest.com/wallstreetjournal/docview/399095897/F38102464A914E41PQ/235?accountid=14512	Some also produce an enzyme, known as ESBL, that enables them to break down antibiotics and develop even more resistance.
865	The Informed Patient: 'Superbugs' That Strike the Sickest Patients	http://search.proquest.com/wallstreetjournal/docview/399095897/F38102464A914E41PQ/235?accountid=14513	Hospitals are now scrambling to come up with strategies to fight both gram-positive and gram-negative classes of bacteria, without increasing the chances that preventing one will lead to the rise of the other.
866	Don't Forget the Bacterial Threat	http://search.proquest.com/wallstreetjournal/docview/399084931/E9F594EAD4EA4960PQ/245?accountid=14512	Unfortunately, the era of easily treated infections is proving to be short-lived, as bacteria develop increasingly sophisticated mechanisms of resistance to antibiotics.
867	World News: Gene Makes 'Superbugs' Resistant To Drugs	http://search.proquest.com/wallstreetjournal/docview/741770434/fulltext/E9F594EAD4EA4960PQ/260?accountid=14512	The indiscriminate use of antibiotics has been blamed as the main factor responsible for the rise of antibiotic-resistant bacteria.
868	WHO Calls for Action on Superbugs	http://search.proquest.com/wallstreetjournal/docview/860565507/fulltext/E9F594EAD4EA4960PQ/274?accountid=14512	Antibiotics lose their effectiveness over time, as bacteria naturally evolve and mutate, becoming resistant. And resistance is a global problem.
869	WHO Calls for Action on Superbugs	http://search.proquest.com/wallstreetjournal/docview/860565507/fulltext/E9F594EAD4EA4960PQ/274?accountid=14513	The World Health Organization issued a plea Thursday for collective action to fight emerging superbugs like NDM-1, warning that the threat is spreading fast.
870	U.S. News: Turkey Recall Revives Battle Over Antibiotics	http://search.proquest.com/wallstreetjournal/docview/883303033/fulltext/E9F594EAD4EA4960PQ/300?accountid=14512	While that may prevent disease in the short term, some food-safety specialists say that over time, the heavy use promotes the evolution of bacteria that can fight off the drugs and threaten humans.
871	FDA to Ban Some Antibiotics for Livestock	http://search.proquest.com/wallstreetjournal/docview/913538624/fulltext/E9F594EAD4EA4960PQ/307?accountid=14512	"At this time, FDA is concerned that certain extra-label uses of cephalosporins in food-producing major species are likely to lead to the emergence and dissemination of cephalosporin-resistant strains of food-borne bacterial pathogens," the agency said in a document released Wednesday.
872	FDA to Ban Some Antibiotics for Livestock	http://search.proquest.com/wallstreetjournal/docview/913538624/fulltext/E9F594EAD4EA4960PQ/307?accountid=14513	"Over the last decade there's been a rapid increase in cephalosporin resistance in farm animals and in sick humans and we hope that this \[FDA\] ban will ... hopefully reduce it," said Steve Roach
873	FDA Moves to Restrict Use of Antibiotics in Livestock	http://search.proquest.com/wallstreetjournal/docview/913592248/fulltext/E9F594EAD4EA4960PQ/308?accountid=14512	"Over the last decade there's been a rapid increase in cephalosporin resistance in farm animals and in sick humans, and we hope that this [FDA] ban will... reduce it," said Steve Roach, a spokesman for the nonprofit group Keep Antibiotics Working.
874	FDA Sets Partial Antibiotics Ban for Animals	http://search.proquest.com/wallstreetjournal/docview/969287418/fulltext/E9F594EAD4EA4960PQ/312?accountid=14512	none
875	U.S. News: Deadly Bacterial Infections On the Rise	http://search.proquest.com/wallstreetjournal/docview/1314684256/fulltext/E9F594EAD4EA4960PQ/347?accountid=14512	In a report that for the first time quantifies the scope of the problem, the Centers for Disease Control and Prevention said the germs are growing increasingly drug-resistant.
876	Antibiotics Losing Battle Against Bugs: Report	http://search.proquest.com/wallstreetjournal/docview/1432776238/fulltext/E9F594EAD4EA4960PQ/361?accountid=14512	Bacteria evolve quickly to evade the antibiotics meant to kill them, so greater use of antibiotics will tend to lead to more drug-resistant germs.
877	Antibiotics Losing Battle Against Bugs: Report	http://search.proquest.com/wallstreetjournal/docview/1432776238/fulltext/E9F594EAD4EA4960PQ/361?accountid=14513	The number of deaths from c. difficile has risen more than five times between 2000 and 2007, in part because of a stronger strain of the bacteria that emerged in 2000.
878	Antibiotics Losing Battle Against Bugs: Report	http://search.proquest.com/wallstreetjournal/docview/1432776238/fulltext/E9F594EAD4EA4960PQ/361?accountid=14514	It is increasingly resistant to the last line of medicines available to treat it.
879	Roche Returns to Antibiotic Drugs; Deal for Polyphor Drug Could be Worth $548 Million	http://search.proquest.com/wallstreetjournal/docview/1448260829/fulltext/E9F594EAD4EA4960PQ/370?accountid=14512	Antimicrobial resistance is a growing health care concern world-wide, as antibiotics lose effectiveness over time and bacteria evolve and mutate, becoming resistant.
880	Outbreak of 'Nightmare Bacteria' in Illinois Stirs Worry; Enzyme in Germ Breaks Down Antibiotics, Adding to Concerns About Spread of Drug-Resistant Bugs	http://search.proquest.com/wallstreetjournal/docview/1474924189/fulltext/E9F594EAD4EA4960PQ/379?accountid=14512	none
881	Drug Makers Tiptoe Back Into Antibiotics	http://search.proquest.com/wallstreetjournal/docview/1491225089/fulltext/E9F594EAD4EA4960PQ/382?accountid=14512	none
882	Health & Wellness: A Potential Foe for the ' Superbug'	http://search.proquest.com/wallstreetjournal/docview/1541597797/fulltext/E9F594EAD4EA4960PQ/397?accountid=14512	"I can't imagine anything we could make where resistance would never be an issue," he says. "At the end of the day, this is evolution and you can't fight evolution."
883	Antibiotics Use in Animals Destined for Human Consumption Surges; Report Adds to Concerns Over Widespread Use of Drugs and Ability of Bacteria to Resist Treatments	http://search.proquest.com/wallstreetjournal/docview/1566925013/27E1564D9F4C4E13PQ/405?accountid=14512	A report issued last month by the President's Council of Advisors on Science and Technology, or PCAST, reiterated that bacteria are growing increasingly resilient in large part because drugs are given too frequently to humans.

## Sheet: b
	S2b Table. Random Articles and Their Phrases. How often do bacteria "evolve" resistance to antibiotics in the news? Nina Singh, Matthew Sit, Deanna Chung, Ana A. Lopez, Ranil Weerackoon, and Pamela J. Yeh, 2016
Line Number	Article Title	URL	Phrase with Word
1	Germs Are Fighting Back - Antibiotics Are Losing Ground To Some	http://infoweb.newsbank.com/resources/doc/nb/news/0EB42240D92015D3?p=AWNB	The bacteria can evolve about as quickly as we can make new antibiotics
2	Antibiotics losing war vs. germs in children	http://infoweb.newsbank.com/resources/doc/nb/news/0EB4237FF74C1BB8?p=AWNB	Resistance to antibiotics is a growing problem, caused by the devilish ability of microbes to evolve new defenses against drugs
3	FEARING DRUG RESISTANCE	http://infoweb.newsbank.com/resources/doc/nb/news/0F80844AB3765A20?p=AWNB	Within a few years of penicillin going on the market in 1940, microbes began evolving into resistant forms through random genetic mutation.
4	COMMON ILLS OUTRACING CURES, SCIENCE WARNS	http://infoweb.newsbank.com/resources/doc/nb/news/0F8084834815823D?p=AWNB	Americans should be...more concerned about the increasing number of ordinary bacteria strains, microbiologists warn, because it's the everyday ones that have evolved to shrug off every type of medicine doctors can throw at them
5	COMMON ILLS OUTRACING CURES, SCIENCE WARNS	http://infoweb.newsbank.com/resources/doc/nb/news/0F8084834815823D?p=AWNB	Microbes have been evolving and mutating to survive antibiotic attacks
6	MRSA – how bad is the threat?	http://infoweb.newsbank.com/resources/doc/nb/news/11CDA461E534B050?p=AWNB	But some say community strains are bound to become resistant to more antibiotics as they evolve
7	MARCHING ON, SUPERBUG THAT KNoWS No FEAR	http://www.lexisnexis.com/hottopics/lnacademic/?shr=t&sfi=AC00NBGenSrch&csi=138806	If someone is given antibiotics too often, bacteria in the body can evolve into bacteria which are immune to the drug.
8	Peers demand superbug action	http://www.lexisnexis.com/hottopics/lnacademic/?shr=t&sfi=AC00NBGenSrch&csi=138836	'Every needless dose of antibiotics increases the evolutionary pressure in favour of resistant strains, hasten-medical help immediately.
9	RETURN OF THE plaque?; Today, we've forgotten how mankind has been ravaged by disease. But the outbreak of Sars is a chilling reminder of the human race's frailty in the face of Nature...	http://www.lexisnexis.com/hottopics/lnacademic/?shr=t&sfi=AC00NBGenSrch&csi=138854	After all, bacteria pass through many generations every day. For them, the evolutionary timescale is much shortened by comparison with that of elephants or tortoises.
10	SUPERBUG APOCALYPSE	http://www.lexisnexis.com/hottopics/lnacademic/?shr=t&sfi=AC00NBGenSrch&csi=138859	Superbugs, potential killers every one, are evolving, not merely by the week but by the day - far faster than the men and women in white coats can keep up with them.
11	Our drug will wipe out MRSA, say British scientists	http://www.lexisnexis.com/hottopics/lnacademic/?shr=t&sfi=AC00NBGenSrch&csi=138876	Most antibiotics target a single protein and that is a relatively easy thing for a bug to evolve around and develop resistance.
12	NEW DRUG WILL WIPE OUT MRSA; Medics hail breakthrough in fight against scourge of Irish hospitals	http://www.lexisnexis.com/hottopics/lnacademic/?shr=t&sfi=AC00NBGenSrch&csi=138877	'Most antibiotics target a single protein and that is a relatively easy thing for a bug to evolve around and develop resistance.
13	WE'VE HAD SUPERBUGS, BUT NoW THE WORLD HEALTH ORGANISATION IS WARNING OF STRAINS SO RESILIENT THAT No DRUGS WILL KILL THEM. SO HOW DO WE SURVIVE THE... ATTACK OF THE HYPERBUGS	http://www.lexisnexis.com/hottopics/lnacademic/?shr=t&sfi=AC00NBGenSrch&csi=138922	Superbugs have evolved in hospitals where there are lots of antibiotics.
14	ANTIBIOTICS IN FAILING HEALTH - Becteria are increasingly resistant to drugs, as in the TB case and research is lagging	http://infoweb.newsbank.com/resources/doc/nb/news/119DB637BAA3F298?p=AWNB	In the past decade, federal agencies - such as the Centers for Disease Control and Prevention, the National Institutes of Health, and the Food and Drug Administration - have warned that antibiotic overuse has led to evolving drug-resistant bacteria.
15	New tainted-meat concerns - U.S. action is urged as salmonella outbreaks rise, but the industry touts proper cooking.	http://infoweb.newsbank.com/resources/doc/nb/news/13BE947BCC460378?p=AWNB	The meat - which has sickened 16 people - is tainted with one of four strains of salmonella that became resistant to multiple antibiotics as they evolved to survive
16	HEALTH & MEDICINE - Compound may fight antibiotic resistance - Researchers say new finding in soil could be critical in the ongoing battle against infections	http://infoweb.newsbank.com/resources/doc/nb/news/111B45F95BF04058?p=AWNB	The discovery could provide a vital weapon in the ongoing battle against infectious bacteria, which are constantly evolving defenses to the drugs used against them
17	ANOTHER VOICE - The Washington Post - Threat to modern medicine	http://infoweb.newsbank.com/resources/doc/nb/news/13FFDC9B4035AE30?p=AWNB	Through the relentless process of evolution, pathogens are evading the drugs, a problem known as antimicrobial resistance
18	`Jumping Genes' Blamed for Resistant Bacteria: [Bulldog Edition]	http://search.proquest.com/latimes/docview/280714520/E503DAF8B2A24B61PQ/27?accountid=14512	This practice has led to tougher bacterial strains that have evolved to successfully fight off the drugs by chemically neutralizing them
19	Old and New Infectious Diseases Trigger Global Struggle; Medicine: Dense populations, adaptable bugs and man's encroachment on nature are blamed. Health experts react slowly.: [Bulldog Edition]	http://search.proquest.com/latimes/docview/293382482/F07FD7ADAC4943C9PQ/115?accountid=14512	It'll either be our technology or it will be the evolution of the germ world that will have established its ascendancy
20	Not Above Popping Pills Meant for Pets; Medication* To cut costs or save time, some people take drugs intended for animals, a risky practice.: [HOME EDITION]	http://search.proquest.com/latimes/docview/421712594/D09D37E1A6284632PQ/231?accountid=14512	bacteria eventually evolve defenses against the drugs.
21	THE NATION; Virulent Drug-Resistant TB Strain Emerges: [HOME EDITION]	http://search.proquest.com/latimes/docview/422065339/D09D37E1A6284632PQ/279?accountid=14512	The evolution of drugresistant strains of Mycobacterium tuberculosis is a result
22	Prescription for trouble; The FDA should deny a request to use a key human antibiotic on beef cattle. The risks are too great.: [HOME EDITION]	http://search.proquest.com/latimes/docview/422153738/D09D37E1A6284632PQ/300?accountid=14512	bacteria started evolving to resist the miracle drugs
23	THE WORLD; 'Ecological sacrifice zone' in India; Water in a town with pharmaceutical plants that supply the U.S. is tainted with antibiotics and other strong drugs.	http://search.proquest.com/latimes/docview/422294508/7310D771D6344006PQ/337?accountid=14512	Not only is there the danger of antibiotic-resistant bacteria evolving
24	IN THE WORKS; BACTERIA BATTLERS; With antibiotic resistance rising, scientists look to frogs, roaches and elsewhere for new weapons.	http://search.proquest.com/latimes/docview/754971015/7310D771D6344006PQ/356?accountid=14512	In this ever-escalating battle, the bacteria evolve ways to avoid every drug humans throw at them.
25	Showdown looms over antibiotics; A federal proposal would sharply limit their use in animals raised for food.	http://search.proquest.com/latimes/docview/821895595/7310D771D6344006PQ/358?accountid=14512	Already some difficult-to-treat strains of E. coli and salmonella have evolved
26	Emerging diseases may be unstoppable, researchers warn	http://infoweb.newsbank.com/resources/doc/nb/news/0EFD65F7A0ADF337?p=AWNB	What is happening is simple: Bacteria, viruses and parasites are evolving into new, drug-resistant forms.
27	PATH OF GREAT RESISTANCE Overuse of antibiotics strengthens bacteria and weakens the immune system - a d eadly combination	http://www.lexisnexis.com/lnacui2api/api/version1/getDocCui?lni=44G8-6BB0-00T0-G20C&csi=151550&hl=t&hv=t&hnsd=f&hns=t&hgn=t&oc=00240&perma=true	They evolve in response to the drugs and, in time, morph into new forms that can escape a drug's reach.
28	Common Bacteria Said to Be Turning Untreatable	http://search.proquest.com/nytimes/docview/109295619/fulltextPDF?accountid=14512	Many other strains are evolving into strains that are untreatable
29	Doctors Tell of International Resurgence in a Variety of InfectiousDiseases	http://search.proquest.com/nytimes/docview/430470899/9828B12898AA4299PQ/137?accountid=14512	Instead, in the last decade new infections like that of the AIDS virus, H.I.V., suddenly began killing hundreds of thousands of people, older diseases like tuberculosis returned, and bacteria began evolving to defy treatment.
30	Superbugs	http://search.proquest.com/nytimes/docview/215497650/5DF3D6F862B94ED1PQ/196?accountid=14512	TO TRACE THE EVOLUTION OF THE NEW superbugs, experts inevitably look back to the introduction of penicillin in 1943.
31	Antibiotic Misuse Turns Treatable to Incurable	http://search.proquest.com/nytimes/docview/91377476/fulltextPDF?accountid=14512	Overuse of drugs in wealthy nations combined with underuse in poor ones speeds the natural process of bacteria evolving to survive
32	How Germ-Phobia Can Lead to Illness	http://search.proquest.com/nytimes/docview/431478410/66332E4F6C4440CAPQ/258?accountid=14512	Furthermore, these surviving bacteria may evolve resistance to both antimicrobials and antibiotics that could be transferred to dangerous pathogens.
33	TB Tests Show Promise, but Flaws Limit Progress	http://search.proquest.com/nytimes/docview/433628701/14101F014CDC446BPQ/458?accountid=14512	What alarms health officials is the potential for outbreaks of MDR to evolve into large XDR ones, creating the specter of an uncontrollable health menace.
34	INFECTIOUS STRAINS	http://infoweb.newsbank.com/resources/doc/nb/news/1224CB72C1445B28?p=AWNB	researchers say microbes have been evolving and mutating to survive the attacks - and the more often the drugs are used, the greater the chance that they won't work next time.
35	Nature has way to kill super bugs - Rise of antibiotic-resistant viruses revives study of bacteria eaters	http://infoweb.newsbank.com/resources/doc/nb/news/11E2968623C4E7F8?p=AWNB	"Phage research in more recent years has revealed not only their abundance and diversity of form, but also their dramatic impact on the ecology of our planet, their influence on the evolution of microbial populations,
36	The War Against Superbugs - Health care facilities are getting smarter in fighting multidrug-resistant infections	http://infoweb.newsbank.com/resources/doc/nb/news/14CF70075B344B60?p=AWNB	superbugs, scrappy microorganisms that have had millions of generations to evolve into efficient killers.
37	Merck's promising new bacteria-killer - The compound is in the early stages of testing.	http://infoweb.newsbank.com/resources/doc/nb/news/111BA2AAD4DEA6C0?p=AWNB	Now, older antibiotics have become less effective as bacteria evolved and acquired the ability to survive them.
38	Tougher than MRSA, they beat most drugs	http://infoweb.newsbank.com/resources/doc/nb/news/11CC10BC54A10180?p=AWNB	Drug-resistant bacteria of various types are far less frequent than the strains from which they evolved, but infections are far harder to treat.
39	Evolution hints at a superbug strategy	http://infoweb.newsbank.com/resources/doc/nb/news/139E57F3EB92C130?p=AWNB	it makes sense to let drugs and the immune system "gang up" on infections, whether it's the malaria parasite, TB, a staph bacteria, or even cancer cells, since they, too, can evolve drug-resistant strains.
40	Scientists warn: Germs are gaining	http://infoweb.newsbank.com/resources/doc/nb/news/0EB04226D2FF5F8F?p=AWNB	"We are in a race between microbial evolution and our social intelligence,"
41	Preservative just may be good for you	http://infoweb.newsbank.com/resources/doc/nb/news/0F364FE287E8C7C0?p=AWNB	Even better, bugs do not seem to evolve resistance against it the way they do against vancomycin and other drugs.
42	Preservative just may be good for you	http://infoweb.newsbank.com/resources/doc/nb/news/0F364FE287E8C7C0?p=AWNB	Doctors say it is only a matter of time before bacteria, which evolve quickly because of their rapid life cycle, develop resistance to all current antibiotics.
43	WHO raising red flag over bugs that resist drugs	http://infoweb.newsbank.com/resources/doc/nb/news/0F365732126FE0D1?p=AWNB	Bacteria, parasites and viruses all naturally evolve to fight treatment.
44	New antibiotic fails to halt fast-evolving bacteria strain	http://infoweb.newsbank.com/resources/doc/nb/news/0F369C6A145F5F9E?p=AWNB	Five Chicago patients have caught some of the first recorded infections from a strain of bacteria that has evolved so quickly it can overcome even the newest antibiotic
45	Kids' Ear Problems - Penicillin Losing Some Punch	http://infoweb.newsbank.com/resources/doc/nb/news/0EB4F142702AD09D?p=AWNB	If left untreated, middle ear infections can be deadly, evolving into meningitis or encephalitis,
46	Falling behind: Medical research funding drops as deadly mutations are increasingly able to beat antibiotics	http://infoweb.newsbank.com/resources/doc/nb/news/11E4EAEFFAC0F078?p=AWNB	Overuse of antibiotics, which speeds the natural evolution of bacteria, promoting new mutant strains resistant to those drugs.
47	Beating bad bugs: Economics and evolution frustrate effort to eliminate a growing threat	http://infoweb.newsbank.com/resources/doc/nb/news/11E767C32E9AE498?p=AWNB	These drugs repeatedly raised hopes that the resistance problem could be tamed, but even as scientists developed new generations of cephalosporins, bacteria methodically evolved ways to sidestep each one.
48	BACTERIA BECOMING UNBEATABLE// RESISTANCE TO ANTIBIOTICS EVOLVING IN MANY STRAINS	http://infoweb.newsbank.com/resources/doc/nb/news/0EB5DD9ECFAFA793?p=AWNB	Common bacteria that cause pneumonia, children's ear infections and many other diseases are evolving into forms untreatable by all known medicines, threatening a chilling post-antibiotic era that would be ``nothing short of a medical disaster,'' a researcher said Saturday.
49	MORE GERMS GAIN RESISTANCE TO DRUGS	http://infoweb.newsbank.com/resources/doc/nb/news/0EB5DE4A134706C1?p=AWNB	Antibiotic resistance is almost as old as the antibiotic era, which began after the discovery of penicillin in 1928. Within a few years, doctors witnessed the evolution of microbes that were impervious to the medicine.
50	SYNTHETIC MOLECULE FIGHTS DRUG-RESISTANT BACTERIA//UW RESEARCHERS CREATE SUBSTANCE BASED ON PEPTIDES	http://infoweb.newsbank.com/resources/doc/nb/news/0EB7399B692B965E?p=AWNB	Because the molecule works differently than traditional antibiotics, it probably would be harder for bacteria to evolve resistance to it, said Marissa Miller of the National Institute of Allergies and Infectious Diseases.
51	COMING TO TERMS WITH GERMS - AN EXCELLENT NEW BOOK STUDIES MICROBES AND MAKES ALL THOSE BIG SCIENTIFIC THEORIES UNDERSTANDABLE, EVEN INTRIGUING. PROBLEM IS, IT WILL SCARE THE LIVING DAYLIGHTS OUT OF YOU.	http://infoweb.newsbank.com/resources/doc/nb/news/0F9BBB2F57A9822E?p=AWNB	Rather than make bacteria weaker, antibiotics, we now see, are recipes for the bacteria to use to evolve to be stronger.
52	A threat to modern medicine	http://infoweb.newsbank.com/resources/doc/nb/news/1404914CAF233ED8?p=AWNB	Through the relentless process of evolution, pathogens are evading the drugs, a problem known broadly as antimicrobial resistance.
53	New antibiotic hailed as breakthrough	http://infoweb.newsbank.com/resources/doc/nb/news/10546B938BB452B1?p=AWNB	Australian hospitals have a new weapon to combat the rise of deadly, drug-resistant "superbugs" in the form of a revolutionary synthetic antibiotic
54	Rise of the superbug rekindles interest in natural-born killers - Mind & Body	http://infoweb.newsbank.com/resources/doc/nb/news/10546E9833C27BC0?p=AWNB	But unhappily, they evolve rather quickly, and doctors have recklessly over-prescribed them. So now many bacteria - the so-called "superbugs" - have developed a resistance to antibiotics.
55	Scramble for drugs to defeat superbug	http://infoweb.newsbank.com/resources/doc/nb/news/12DA60146893B9D0?p=AWNB	They are determined to develop new antibiotics capable of fighting the extreme drug resistance shown by the new superbug, which has evolved from the Acinetobacter pathogenic bacteria.
56	Antibiotics losing the battle Tuberculosis among infectious diseases reappearing, scientist says	http://www.lexisnexis.com/lnacui2api/api/version1/getDocCui?lni=4M91-7VN0-TW7J-31YG&csi=303830&hl=t&hv=t&hnsd=f&hns=t&hgn=t&oc=00240&perma=true	Strains of the disease are evolving at a rapid pace toward the point where it could become immune from existing antibiotics.
57	Drug-resistant bacteria seen as huge health risk Standard treatments no longer work, researcher warns	http://www.lexisnexis.com/lnacui2api/api/version1/getDocCui?lni=4M91-3GP0-TW7J-31W3&csi=303830&hl=t&hv=t&hnsd=f&hns=t&hgn=t&oc=00240&perma=true	At his institution alone, researchers have tracked 57 antibiotic- resistant bacteria so far this decade. "And things are evolving so rapidly that this slide was obsolete the day it was ready," Prof. Doern said,
58	Mind & Matter Antibiotic arsenal is rapidly being depleted	http://www.lexisnexis.com/lnacui2api/api/version1/getDocCui?lni=4M91-3M00-TW7J-32KW&csi=303830&hl=t&hv=t&hnsd=f&hns=t&hgn=t&oc=00240&perma=true	Although medical specialists have long appreciated the ability of bacteria to evolve unique defences, they are openly dismayed by its quickening speed.
59	U.S. germs invading Canadian hospitals Antibiotics powerless against bacteria	http://www.lexisnexis.com/lnacui2api/api/version1/getDocCui?lni=4M8X-8B80-TW7J-32PF&csi=303830&hl=t&hv=t&hnsd=f&hns=t&hgn=t&oc=00240&perma=true	Bacteria are experts at adapting by making small changes in their gene structure to respond to the threat of antibiotics. Those that evolve into forms that can survive are able to spread unchecked.
60	Infection experts alarmed by drug-resistant bacteria Hospitals fear deadly complications in some cases	http://www.lexisnexis.com/lnacui2api/api/version1/getDocCui?lni=4M8W-XYR0-TW7J-33CG&csi=303830&hl=t&hv=t&hnsd=f&hns=t&hgn=t&oc=00240&perma=true	Bacteria can evolve to resist drugs because they can transplant portions of their genetic material from one strain to another, Dr. McGeer said. L
61	Hospitals map war against superbugs Quarantine plan to be weighed	http://www.lexisnexis.com/lnacui2api/api/version1/getDocCui?lni=4M8W-Y2K0-TW7J-323N&csi=303830&hl=t&hv=t&hnsd=f&hns=t&hgn=t&oc=00240&perma=true	Bacteria can evolve defences quickly because they have a remarkable ability to borrow not just pieces but entire strings of genetic material from other microbes.
62	Warning given on animal-feed antibiotics	http://www.lexisnexis.com/lnacui2api/api/version1/getDocCui?lni=4M8W-Y3M0-TW7J-3248&csi=303830&hl=t&hv=t&hnsd=f&hns=t&hgn=t&oc=00240&perma=true	"That kind of an exposure puts a pressure . . . to allow for resistant organisms to evolve," said Mr. Losos, director-general of the Laboratory Centre for Disease Control.
63	The Guardian: Antibiotics: agents lose their cutting edge: INSIDE THE NEWS: Most bacteria that live in us and on us are either harmless or actually essential for life. But they mutate all the time, and those that	http://infoweb.newsbank.com/resources/doc/nb/news/0F27DF6823D49732?p=AWNB	Antibiotics also destroy good as well as infectious bacteria, and make a space that can then be colonised by resistant strains. It is all a vivid illustration of evolution in action.
64	The Guardian: Alarm as superbug hits British hospital	http://infoweb.newsbank.com/resources/doc/nb/news/0F2747FE212A2E0C?p=AWNB	A new variety of TB has evolved to conquer the antibiotics once used to treat it.
65	The Guardian: Comment & Analysis: Heads in the ground: Medicine's finest days may soon be over. Even if we stop the routine use of antibiotics on farms now, it is too late to prevent resistant bacteria rendering many modern drugs useless	http://infoweb.newsbank.com/resources/doc/nb/news/0F27486F4A124346?p=AWNB	Resistance is indeed expensive, and some bacteria spend half their energies on it, with long and complicated biochemical pathways that evolution takes years to craft.
66	The Guardian: Science: Zapping superbugs: David Bradley on medicine's latest weapons against bacteria	http://infoweb.newsbank.com/resources/doc/nb/news/0F2B377873AB8A2C?p=AWNB	Even everyday bacteria that live on our skin have evolved into superbugs.
67	The Guardian: Superbugs spread to GP surgeries	http://infoweb.newsbank.com/resources/doc/nb/news/0FCDF8166E1BDE83?p=AWNB	But the strains found here may turn out to be home grown - the development follows years in which bacteria have evolved new defences against powerful antibiotics in hospitals, threatening lives of severely ill patients.
68	The Guardian: Doctors running out of antibiotics to fight some infections, say experts: Don't quit less profitable research, drug firms urged Remedies critical for public health, says agency	http://infoweb.newsbank.com/resources/doc/nb/news/12322D26C5AA2648?p=AWNB	Resistance was inevitable, he said. "This is just evolution in real time. It just happens quicker with germs than in rats and humans."
69	The Guardian: Comment: The reason why this deadly E coli makes doctors shudder: It is past time for health authorities to curb the antibiotic misuse that created the resistance of this aberrant strain	http://infoweb.newsbank.com/resources/doc/nb/news/137B1B8AC798AFD8?p=AWNB	And that should underline how important it is to slow down the evolution of antibiotic resistance, by cutting back inappropriate use of antibiotics in everyday medicine and on farms.
70	The Guardian: Radio review	http://infoweb.newsbank.com/resources/doc/nb/news/13932E78A04060D0?p=AWNB	"Evolution is the driving force of nature. We use antibiotics; we kill sensitive bacteria. Resistant ones survive; they infect further patients."
71	The Guardian: DNA sleuths track down origins of superbug: Scientists trace genesis of infection to US and Canada Research will help fight against killer hospital bug	http://infoweb.newsbank.com/resources/doc/nb/news/1431624584918E40?p=AWNB	"Since these strains acquired resistance to this frontline antibiotic, not only is it now virtually useless against this organism, but resistance seems to have been a major factor in the continued evolution and persistence of these strains in hospitals and clinical settings," said Brendan Wren, a professor at the London School of Hygiene and Tropical Medicine.
72	The Guardian: G2: Health: The war against superbugs: Antibiotic-resistant bacteria kill far more people each year globally than terrorism. Why are we losing the battle against them, asks Dr Kevin Fong	http://infoweb.newsbank.com/resources/doc/nb/news/1451ABD9D9332818?p=AWNB	Antibiotics have become drugs that are expensive to develop, which are only used in short courses and which are quickly rendered near obsolete by the evolution of bacterial resistance.
73	The Guardian: Front: UK raises alarm on superbugs: Calls for clampdown on overuse of antibiotics to limit lethal infections	http://infoweb.newsbank.com/resources/doc/nb/news/146E591149EC5FF0?p=AWNB	Recent studies have shown that the overuse of antibiotics in intensive livestock farming could lead to the evolution of strains of dangerous bacteria
74	Call for new generation of antibiotics to fight off superbugs - Chief medical officer welcomes prime minister's demand for global action to combat problem	http://infoweb.newsbank.com/resources/doc/nb/news/14ED54AE71D3D430?p=AWNB	The first included natural penicillins. However, this group became ineffective as bacteria evolved enzymes that broke the drugs apart.
75	Super drugs turn super killers, claim more lives than terror	http://infoweb.newsbank.com/resources/doc/nb/news/145214E68A384D70?p=AWNB	For every method of attack, the pharmaceutical companies invent, bacteria rapidly evolve a defence.
76	Self-prescription, overuse of drugs increases resistance risk	http://infoweb.newsbank.com/resources/doc/nb/news/15646972B87C20F8?p=AWNB	The widespread use of antibiotics has played an important role in evolution of the drug resistant bacterium.
77	Antibiotic resistance voted as deadliest threat	http://infoweb.newsbank.com/resources/doc/nb/news/156557B9945E33F0?p=AWNB	Clinicians often prescribe broad spectrum antibiotics to sick patients because doctors have to act quickly on imperfect information. These methods put selective pressure on microbes to evolve resistance to antibiotics.
78	A looming antibiotic 'apocalypse' It's possible to return to the death rates common before the use of penicillin	http://infoweb.newsbank.com/resources/doc/nb/news/10BC81EB88F76518?p=AWNB	Strains of resistant microbes have evolved for virtually every disease ever treated with antibiotics, from malaria to the common urinary tract infection.
79	Tough new bacteria worry MDs	http://infoweb.newsbank.com/resources/doc/nb/news/10BBE26314760598?p=AWNB	The 200 doctors, scientists, hospital staff, nursing home officials, bureaucrats and drug company experts gathered for the Montreal meeting were told such a drug-beating superbug appears to be evolving in Japa
80	No quick victory in this war	http://infoweb.newsbank.com/resources/doc/nb/news/10BA8424AB02A2A8?p=AWNB	In addition, the genes that encode these defences are carried on small, easily portable loops of DNA, meaning that once one kind of bacteria evolves them, the genes can be - and most definitely are - passed on to other kinds. That's why the appearance of antibiotic resistance in even totally harmless bacteria is greeted with dismay.
81	Superbug resists toughest antibiotic	http://infoweb.newsbank.com/resources/doc/nb/news/10B93F4519190898?p=AWNB	Penicillin is now nearly useless against staph aureus. Overuse has fuelled resistance, a process in which the rapidly evolving bug learns how to evade the drug's firepower.
82	Hold the pickles, and the antibiotics	http://infoweb.newsbank.com/resources/doc/nb/news/10C7C867EE314D58?p=AWNB	Antibiotics wipe out most of their target bacteria on first use, but the few that survive begin an evolutionary process toward drug resistance. They may become more virulent in the process.
83	Goodbye, antibiotics - Antibiotic resistance appears to be so unstoppable that we need to develop new ways to fight and prevent infections	http://infoweb.newsbank.com/resources/doc/nb/news/138955FB376DF4E8?p=AWNB	And now, with the news last week that a strain of gonorrhea has evolved to be completely untreatable, the future of antibiotics may be as grim as the Titanic.
84	Antibiotic apocalypse - The next 'nightmare' superbug could have deadly consequences as resistance to once-potent drugs grows	http://infoweb.newsbank.com/resources/doc/nb/news/145EFB8CCB162280?p=AWNB	Over billions of years, bacteria evolved defensive strategies: they can pump the antibiotic out, inactivate it, or even mutate themselves so the antibiotic no longer works.
85	Antibiotic apocalypse - The next 'nightmare' superbug could have deadly consequences as resistance to once-potent drugs grows	http://infoweb.newsbank.com/resources/doc/nb/news/145EFB8CCB162280?p=AWNB	Over billions of years, bacteria evolved defensive strategies: they can pump the antibiotic out, inactivate it, or even mutate themselves so the antibiotic no longer works.
86	Antibiotic misuse breeds superbugs	http://infoweb.newsbank.com/resources/doc/nb/news/0EB77284D762B4C8?p=AWNB	Doctors warn that such misuse is partly to blame for the evolution of superbugs - bacteria that don't respond to a widening array of drugs.
87	The evolution of infections	http://infoweb.newsbank.com/resources/doc/nb/news/0EB77317A9E9949D?p=AWNB	The evolution of infections
88	Antibiotic misuse invites global disaster, WHO warns	http://infoweb.newsbank.com/resources/doc/nb/news/0EB77405C73EBB9E?p=AWNB	Microbes evolve to survive antibiotics.
89	Microbes eat away at antibiotics	http://infoweb.newsbank.com/resources/doc/nb/news/0F662F202084B7D1?p=AWNB	As bacteria evolve resistance to more classes of antibiotics, drug companies are racing to create new ones.
90	Next pandemic' could be man-made - CDC warns about growing threat of antibiotic resistance	http://infoweb.newsbank.com/resources/doc/nb/news/14F3DAA2F83023D8?p=AWNB	The bugs are always evolving, even when the medicines are not.
91	It's Getting Harder To Fight Those Bugs That Ruin Vacations	http://search.proquest.com/wallstreetjournal/docview/398688695/fulltext/B9783CC047B4413CPQ/93?accountid=14512	What's worse, bugs are evolving new patterns of resistance to many popular antibiotics.
92	Potential Ally Against Anthrax Emerges in Lab	http://search.proquest.com/wallstreetjournal/docview/399016556/C1B578A4F8964D83PQ/143?accountid=14512	SCIENTISTS HAVE taken the first steps toward fighting anthrax, streptococcus and other infectious bacteria with virus-produced enzymes, exploding the targeted microbes without apparent side effects or encouraging the evolution of drug-resistant strains.
93	WHO Calls for Action on Superbugs	http://search.proquest.com/wallstreetjournal/docview/860565507/fulltext/E9F594EAD4EA4960PQ/274?accountid=14512	Antibiotics lose their effectiveness over time, as bacteria naturally evolve and mutate, becoming resistant. And resistance is a global problem.
94	U.S. News: Turkey Recall Revives Battle Over Antibiotics	http://search.proquest.com/wallstreetjournal/docview/883303033/fulltext/E9F594EAD4EA4960PQ/300?accountid=14512	While that may prevent disease in the short term, some food-safety specialists say that over time, the heavy use promotes the evolution of bacteria that can fight off the drugs and threaten humans.
95	Antibiotics Losing Battle Against Bugs: Report	http://search.proquest.com/wallstreetjournal/docview/1432776238/fulltext/E9F594EAD4EA4960PQ/361?accountid=14512	Bacteria evolve quickly to evade the antibiotics meant to kill them, so greater use of antibiotics will tend to lead to more drug-resistant germs.
96	Roche Returns to Antibiotic Drugs; Deal for Polyphor Drug Could be Worth $548 Million	http://search.proquest.com/wallstreetjournal/docview/1448260829/fulltext/E9F594EAD4EA4960PQ/370?accountid=14512	Antimicrobial resistance is a growing health care concern world-wide, as antibiotics lose effectiveness over time and bacteria evolve and mutate, becoming resistant.
97	Health & Wellness: A Potential Foe for the ' Superbug'	http://search.proquest.com/wallstreetjournal/docview/1541597797/fulltext/E9F594EAD4EA4960PQ/397?accountid=14512	"I can't imagine anything we could make where resistance would never be an issue," he says. "At the end of the day, this is evolution and you can't fight evolution."
98	Abuse Dilutes Antibiotics' Power - Weakened Efficacy Of Wonder Drugs Becoming Common	http://infoweb.newsbank.com/resources/doc/nb/news/0EB4213C124E875B?p=AWNB	Multiple-drug resistance occurs when bacteria destroy or inactivate an antibiotic or a class of antibiotics, either by mutation or by blocking the effects of the drug
99	Antibiotics losing war vs. germs in children	http://infoweb.newsbank.com/resources/doc/nb/news/0EB4237FF74C1BB8?p=AWNB	For example, a chance mutation can give a microbe resistance.
100	PROTEIN MAY BECOME WEAPON AGAINST STAPH	http://infoweb.newsbank.com/resources/doc/nb/news/0F80CFD435DB1482?p=AWNB	And because a RAP vaccine wouldn't kill the actual bacteria, as antibiotics do, it wouldn't spur the bugs to mutate into drug-resistant forms that now threaten to become untreatable
101	ANTIBIOTICS USE ON FARMS WORRIES HEALTH OFFICIALS	http://infoweb.newsbank.com/resources/doc/nb/news/0F80D00EC4DEBBE0?p=AWNB	But scientists say antibiotics on the farm are helping foodborne germs mutate, too, even as the government is under pressure to approve more agricultural drugs
102	BATTLING BACTERIA BACKFIRES OVERRELIANCE ON ANTIBIOTICS IS CREATING STRAINS THAT ARE RESISTANT TOPENICILLIN-CLASS DRUGS, SAYS STUDY	http://infoweb.newsbank.com/resources/doc/nb/news/0F80D01F9F6FD4C9?p=AWNB	Scientists believe that antibiotics lose their effectiveness as more bacteria are exposed to the drug, then mutate, forming a resistance to the drug
103	Antibiotics forum looks at overuse in 2 fields	http://infoweb.newsbank.com/resources/doc/nb/news/0F3DC02C5CA74E39?p=AWNB	They said the arsenal of antibiotics is incapable of withstanding the kind of guerrilla warfare that mutating bacteria practice.
104	BEWARE THE SUPERBUG;	http://www.lexisnexis.com/hottopics/lnacademic/?shr=t&sfi=AC00NBGenSrch&csi=138806	This is a beast capable of mutating.
105	MARCHING ON, SUPERBUG THAT KNoWS No FEAR	http://www.lexisnexis.com/hottopics/lnacademic/?shr=t&sfi=AC00NBGenSrch&csi=138808	Another mutant, which can also kill, is said to lurk on hospital floors, bedding, furniture, mops, bedpans and toilets.
106	Power light that could destroy the superbugs	http://www.lexisnexis.com/hottopics/lnacademic/?shr=t&sfi=AC00NBGenSrch&csi=138817	But what we didn't bargain for was them mutating and becoming immune.'
107	Hospitals on alert over superbug that defies drugs	http://www.lexisnexis.com/hottopics/lnacademic/?shr=t&sfi=AC00NBGenSrch&csi=138824	The bacteria mutate and the resistant ones survive.
108	RETURN OF THE plaque?; Today, we've forgotten how mankind has been ravaged by disease. But the outbreak of Sars is a chilling reminder of the human race's frailty in the face of Nature...	http://www.lexisnexis.com/hottopics/lnacademic/?shr=t&sfi=AC00NBGenSrch&csi=138855	A look at the history of natural selection, perhaps, should have warned us that the triumph of antibiotics over disease-causing bacteria would not be permanent, and that the bacteria would fight back by mutating.
109	Hospital superbug deaths 'to double as MRSA beats jabs'	http://www.lexisnexis.com/hottopics/lnacademic/?shr=t&sfi=AC00NBGenSrch&csi=138863	' I t's a constant battle against these superbugs. We thought we had it won a few years ago, but they keep mutating.
110	HOW CAN I BEAT THIS 'SUPERBUG' INFECTION?	http://www.lexisnexis.com/hottopics/lnacademic/?shr=t&sfi=AC00NBGenSrch&csi=138865	Bacteria are single-cell organisms which, in their fight for survival, mutate and change their constituent protein so as to become resistant to antibiotics.
111	TB superbug is spreading, experts warn	http://www.lexisnexis.com/hottopics/lnacademic/?shr=t&sfi=AC00NBGenSrch&csi=138873	They grow, multiply and mutate quicker than we can deal with them.'
112	NEW DRUG WILL WIPE OUT MRSA; Medics hail breakthrough in fight against scourge of Irish hospitals	http://www.lexisnexis.com/hottopics/lnacademic/?shr=t&sfi=AC00NBGenSrch&csi=138878	'We don't have anything like it currently. It sounds particularly promising because it would make it much harder for bacteria to mutate.
113	WE'VE ONLY GOT OURSELVES TO BLAME FOR THE INDESTRUCTIBLE INDIAN SUPERBUG	http://www.lexisnexis.com/hottopics/lnacademic/?shr=t&sfi=AC00NBGenSrch&csi=138917	And amid this promiscuity the bacteria's genes get spliced and transferred, and mutations are acquired and passed on.
114	HOW TOOTHPASTE IS SPEEDING UP THE SPREAD OF SUPERBUGS	http://www.lexisnexis.com/hottopics/lnacademic/?shr=t&sfi=AC00NBGenSrch&csi=138918	Laboratory studies have shown triclosan can trigger gene mutations in bacteria, enabling them to protect themselves against it.
115	HOW TOOTHPASTE IS SPEEDING UP THE SPREAD OF SUPERBUGS	http://www.lexisnexis.com/hottopics/lnacademic/?shr=t&sfi=AC00NBGenSrch&csi=138919	Studies have shown there are already bacterial mutations of E coli, salmonella and listeria, which have some degree of resistance to triclosan.
116	WE'VE HAD SUPERBUGS, BUT NoW THE WORLD HEALTH ORGANISATION IS WARNING OF STRAINS SO RESILIENT THAT No DRUGS WILL KILL THEM. SO HOW DO WE SURVIVE THE... ATTACK OF THE HYPERBUGS	http://www.lexisnexis.com/hottopics/lnacademic/?shr=t&sfi=AC00NBGenSrch&csi=138923	Mutations (changes) in the genetic code of all cells Z ours and the bacteria Z happen all the time. If a mutation occurs that prevents a bacterium from being killed by an antibiotic, this bacterium will live while the others around it are killed when the antibiotic treatment is given.
117	IF WE DON'T STOP HANDING OUT ANTIBIOTICS LIKE SWEETS, EVEN A CUT FINGER COULD SOON BE FATAL	http://www.lexisnexis.com/hottopics/lnacademic/?shr=t&sfi=AC00NBGenSrch&csi=138929	Those survivors, which have been put under stress but not killed, may recover in a mutated form that the drugs can no longer attack.'
118	Discovery could lead to staph vaccine - Protein shows promise in mice tests, scientists say	http://infoweb.newsbank.com/resources/doc/nb/news/0ED3DAAF3917F7AF?p=AWNB	And because a RAP vaccine wouldn't kill the actual bacteria, as antibiotics do, it wouldn't spur the bugs to mutate into drug-resistant forms that now threaten to become untreatable, Dr. Balaban added
119	Discovery could lead to staph vaccine - Protein shows promise in mice tests, scientists say	http://infoweb.newsbank.com/resources/doc/nb/news/0ED3DAAF3917F7AF?p=AWNB	Antibiotics are losing their effectiveness as more bacteria are exposed to the drugs and mutate to avoid them
120	Drug defiance - Resistance to new medications is an emerging problem in battle against the AIDS virus	http://infoweb.newsbank.com/resources/doc/nb/news/0ED3DAD12D8C9AC0?p=AWNB	Two subjects were infected with strains mutated enough to cause resistance to two protease inhibitors
121	Study warns of microbe threat - World Health Organization says antibiotic overuse creating resistant bugs	http://infoweb.newsbank.com/resources/doc/nb/news/0ED822CED391F018?p=AWNB	The ability of bacteria, viruses and parasites to become resistant to drugs is a naturally occurring phenomenon involving mutation and survival of the fittest microbes
122	Study warns of microbe threat - World Health Organization says antibiotic overuse creating resistant bugs	http://infoweb.newsbank.com/resources/doc/nb/news/0ED822CED391F018?p=AWNB	Microbes that cause diseases ranging from sore throats and pneumonia to malaria and AIDS are mutating at an alarming rate around the globe into much more dangerous infections that fail to respond to drugs
123	Bacteria gaining on treatments "Superbugs' resist antibiotic wonders	http://infoweb.newsbank.com/resources/doc/nb/news/0EAF4450CDD07CDB?p=AWNB	Mutant forms of tuberculosis, which has resurged sharply in the United States in recent years, can resist as many as 11 drugs and has become a major threat to people who also have the AIDS virus, hastening their deaths
124	Tis THE SEASON	http://infoweb.newsbank.com/resources/doc/nb/news/0EAF44804059BF48?p=AWNB	When you don't finish a course of antibiotics designed to eradicate a certain bug, surviving microbes may find ways to mutate into new, drug-resistant strains
125	Bacteria resisting anti-germ lotions Genetic effects likened to misuse of antibiotics	http://infoweb.newsbank.com/resources/doc/nb/news/0EAF44E898FCBC99?p=AWNB	They also said resistance to triclosan comes from mutations in two genes, called ycjD and fab1
126	SPECIAL REPORT Diseases resisting antibiotics Drugs often misused, overused, report says	http://infoweb.newsbank.com/resources/doc/nb/news/0EAF457A296E3921?p=AWNB	Penicillin has become virtually useless in fighting mutant strains of gonorrhea, a venereal disease
127	Half of chicken sold tainted with bacteria	http://infoweb.newsbank.com/resources/doc/nb/news/0F8045C9F355BE10?p=AWNB	In 1990, the Centers for Disease Control and Prevention recorded no evidence of such resistance, indicating that the bacteria has genetically mutated to survive an antibiotic dosage
128	Drug-Resistant Bacteria Pose an Increasing Threat Health: About 13,000 die in U.S. each year from germs that have developed a tolerance for common antibiotics.: [Home Edition]	http://search.proquest.com/latimes/docview/293080263/F07FD7ADAC4943C9PQ/102?accountid=14515	And resistant mutants have spread to virtually every nation
129	Old and New Infectious Diseases Trigger Global Struggle; Medicine: Dense populations, adaptable bugs and man's encroachment on nature are blamed. Health experts react slowly.: [Bulldog Edition]	http://search.proquest.com/latimes/docview/293382482/F07FD7ADAC4943C9PQ/115?accountid=14513	And the halfhearted drug treatment has given another batch of TB bacilli the time and space to mutate into resistant forms
130	Scientists Find New Way to Foil Staph Bacteria; Medicine: Instead of killing germs, immunization blocks toxin release. Resistance is less likely to develop.: [Home Edition]	http://search.proquest.com/latimes/docview/421285749/F07FD7ADAC4943C9PQ/143?accountid=14513	it appears that the mutational ability of the bacterium may be outrunning the innovations of chemists
131	The Superbug Threat: [Home Edition]	http://search.proquest.com/latimes/docview/421249581/F07FD7ADAC4943C9PQ/145?accountid=14514	but random mutations that create superbugs will always occur
132	INSIDE STORY; The Enemy Within; You Probably Don't Want to Know What Dr. David Pegues Knows About Hospitals, About Those Nasty, Drug- Resistant Microbes Lying in Wait. But What the Germ Warrior Knows Just Might Save Your Life.: [Home Edition]	http://search.proquest.com/latimes/docview/421625290/F07FD7ADAC4943C9PQ/169?accountid=14515	"wild strains" of bacteria--those that can be killed by antibiotics--reclaim their turf from the mutants
133	Health Matters; Antibiotics and the Chicken Connection: [HOME EDITION]	http://search.proquest.com/latimes/docview/421713946/D09D37E1A6284632PQ/230?accountid=14514	Those that remain mutate and rapidly become resistant to the antibiotics.
134	A CLOSER LOOK: ANTI-LISTERIA SPRAY; Latest food additive: Viruses; The FDA-approved bacteria eaters work on deli meats and other ready- to-eat foods.: [HOME EDITION]	http://search.proquest.com/latimes/docview/422201681/D09D37E1A6284632PQ/285?accountid=14512	In other words, "there is lots of protection in case a mutation occurred
135	THE WORLD; 'Ecological sacrifice zone' in India; Water in a town with pharmaceutical plants that supply the U.S. is tainted with antibiotics and other strong drugs.	http://search.proquest.com/latimes/docview/422294508/7310D771D6344006PQ/337?accountid=14514	The more bacteria is exposed to a drug, the more likely that bacteria will mutate in a way that renders the drug ineffective.)
136	SEEKING A KILLER DRUG	http://infoweb.newsbank.com/resources/doc/nb/news/101D990BAF73814B?p=AWNB	organisms that face a situation 10 billion times, for example, have more chances of mutating into a more survivable entity than those that face a situation 10 million times
137	U.S. HEALTH: Resistant gonorrhea cases soar - The Center for Disease Control and Prevention reported an increase in antibiotic-resistant gonorrhea across the country -- and figures show Miami is hit hard.	http://infoweb.newsbank.com/resources/doc/nb/news/1187DDF7E2E59FD0?p=AWNB	Gonorrhea's resistance was probably caused by the same problem that led to resistance of other organisms -- the casual use of antibiotics in the United States and overseas, which cause pathogens to mutate
138	Antibiotics overuse creates lethal drug-resistant bugs, say experts - Overuse of antibiotics by private doctors and hospitals is causing lethal diseases to mutate and become resistant to the drugs, say experts.	http://infoweb.newsbank.com/resources/doc/nb/news/13B93D44364B5E48?p=AWNB	It’s a worldwide problem, with African countries encountering mutated, drug-resistant forms of malaria and other diseases
139	DREADED GERM UPS ANTE INFECTION POTENTIALLY UNBEATABLE	http://www.lexisnexis.com/lnacui2api/api/version1/getDocCui?lni=3SCH-G2S0-0093-D42J&csi=151550&hl=t&hv=t&hnsd=f&hns=t&hgn=t&oc=00240&perma=true	Just two years ago, New York City experienced a dramatic increase in another bacteria drug-resistant mutant strains of streptococcus pneumonia, or flesh-eating bacteria.
140	PATH OF GREAT RESISTANCE Overuse of antibiotics strengthens bacteria and weakens the immune system - a d eadly combination	http://www.lexisnexis.com/lnacui2api/api/version1/getDocCui?lni=44G8-6BB0-00T0-G20C&csi=151550&hl=t&hv=t&hnsd=f&hns=t&hgn=t&oc=00240&perma=true	"The germs are trying to survive and will select mutants and reproduce every 15 to 20 minutes," Farber says.
141	Superbugs	http://search.proquest.com/nytimes/docview/215497650/5DF3D6F862B94ED1PQ/196?accountid=14515	in a 1945 interview with The New York Times, Fleming warned that misuse of penicillin could lead to the propagation of mutant forms of bacteria that would resist the new miracle drug.
142	Strain of Bacteria Worries Scientists After Children Die: After 4 Deaths, Scientists Fear Threat From Germ Strain	http://search.proquest.com/nytimes/docview/109954384/fulltextPDF?accountid=14512	Staph bugs did not escape from the hospital, but rather mutated in the environment
143	Looking for a Superbug Killer: [Business/Financial Desk]	http://search.proquest.com/nytimes/docview/762545756/fulltext/B356768857E6430CPQ/537?accountid=14513	For example, scientists have become alarmed by the spread from India of a newly discovered mutation called NDM-1, which renders certain germs like E. coli invulnerable to nearly all modern antibiotics.
144	Let's Gang Up on Killer Bugs: [Op-Ed]	http://search.proquest.com/nytimes/docview/1223786019/fulltext/2D0B1B1F500D41C9PQ/581?accountid=14513	Large numbers of independently mutating bacteria test adaptations to group problems, like how to survive antibiotics.
145	EXPERTS SAY ANTIBIOTICS TURMOIL WAS CULTIVATED BY SHUNNING OF RESEARCH	http://infoweb.newsbank.com/resources/doc/nb/news/1224870428DC6748?p=AWNB	the bacteria causing the infections are being given a far greater chance to mutate or pass along antibiotic-defeating behavior to offspring
146	Experts say stubborn staph case is isolated and under control	http://infoweb.newsbank.com/resources/doc/nb/news/0EFDA89D6B1FC188?p=AWNB	Bacteria mutation is a natural phenomenon that is dramatically speeded up by the overzealous use of antibiotics that destroy all but the strongest strains.
147	From savior to assassin How killer germs have defeated our last antibiotic	http://infoweb.newsbank.com/resources/doc/nb/news/0FF53726CC2944B3?p=AWNB	dangerous when they enter the bloodstream or when they mutate and become strong enough to override a person's immune system.
148	TO COMBAT RESISTANCE, SCIENTISTS URGE MORE PRUDENT USE OF ANTIBIOTICS	http://infoweb.newsbank.com/resources/doc/nb/news/0EB32FF9579548C8?p=AWNB	Scientists issued a new call yesterday for more prudent use of antibiotics, warning that overprescribing for every sniffle and ear infection is fast helping germs mutate
149	NEW CONCERN SEEN ON ANTIBACTERIALS \ THE AGENT IN MANY SOAPS AND LOTIONS COULD BE MAKING GERMS MORE DRUG-RESISTANT, A STUDY SAID.	http://infoweb.newsbank.com/resources/doc/nb/news/0EB3305175C30C8E?p=AWNB	Germs can genetically mutate into super-strains if they are repeatedly exposed to, but not killed by, antibiotic drugs and antibacterial agents.
150	WASHOUTS IN THE WAR ON GERMS? WHILE ANTIBACTERIAL PRODUCTS ARE POPULAR, STUDIES INDICATE THAT THEY DO NO BETTER THAN SOAP AND WATER. SOME SCIENTISTS EVEN WORRY THAT THE PRODUCTS MAY DO MORE HARM THAN GOOD.	http://infoweb.newsbank.com/resources/doc/nb/news/0EB735FBA46790F4?p=AWNB	because triclosan targets a particular part of the cell - a gene - it primes the bacteria for genetic mutations that may produce a hardier, more resistant strain.
151	Mutant bacteria running amok in suburbs - Fighting viruses with antibiotics doesn't work but when patients demand them anyway, they risk their own health and the health of others.	http://infoweb.newsbank.com/resources/doc/nb/news/0EB0431A796574B4?p=AWNB	If antibiotics are overused, bacteria will mutate and form defenses to outwit the medicine and survive
152	Gaps in safety system let `bugs' hide in food	http://infoweb.newsbank.com/resources/doc/nb/news/0F364B39237A6276?p=AWNB	Bacteria resilient, mutating to resist varied antibiotics
153	Anti-Bacterial Cleaners Squash Bugs	http://infoweb.newsbank.com/resources/doc/nb/news/0EB4F921DF026CB8?p=AWNB	"Just like if you were taking an antibiotic for a particular illness and stopped midway through treatment, the disease can mutate.
154	Antibiotics vs. superbugs	http://infoweb.newsbank.com/resources/doc/nb/news/0ED10E7CC72738D5?p=AWNB	Because the pharmaceutical industry deploys the same antibiotics for animals and people, mutating bacteria becomes resistant to the drugs use for both livestock and humans.
155	Science to the rescue: Sunnyvale company tapped for national effort to defeat bacterium that kills more in U.S. than AIDS	http://infoweb.newsbank.com/resources/doc/nb/news/11C8FE9E53B05438?p=AWNB	But the antibiotic also gives a survival edge to mutated forms of the germ that can thrive despite the treatment.
156	MORE GERMS GAIN RESISTANCE TO DRUGS	http://infoweb.newsbank.com/resources/doc/nb/news/0EB5DE4A134706C1?p=AWNB	This happens either through random genetic mutation or by picking up a resistance gene from another strain of bacteria.
157	VIRULENT DISEASES MAKE COMEBACK//BACTERIA, WORLD SHIFTING	http://infoweb.newsbank.com/resources/doc/nb/news/0EB5DEBCA3D37A02?p=AWNB	Microbes have an amazing ability to mutate and produce strains that are resistant to more and more antibiotics. Overuse and misuse of antibiotics have sped up the process.
158	ANTIBIOTICS FOR ANIMALS MAY THREATEN FOOD SAFETY	http://infoweb.newsbank.com/resources/doc/nb/news/0EB5E2DFE1A8403B?p=AWNB	ut scientists say antibiotics on the farm are helping foodborne germs mutate, too, even as the government is under pressure to approve more agricultural drugs.
159	DRUG-RESISTANT BUG A SERIOUS DEVELOPMENT//EXPERTS POINT OUT ANTIBIOTIC OVERUSE AS PART OF PROBLEM	http://infoweb.newsbank.com/resources/doc/nb/news/0EB5E403C34668BF?p=AWNB	This widespread misuse enables bacteria to mutate into antibiotic-resistant killers.
160	COMING TO TERMS WITH GERMS - AN EXCELLENT NEW BOOK STUDIES MICROBES AND MAKES ALL THOSE BIG SCIENTIFIC THEORIES UNDERSTANDABLE, EVEN INTRIGUING. PROBLEM IS, IT WILL SCARE THE LIVING DAYLIGHTS OUT OF YOU.	http://infoweb.newsbank.com/resources/doc/nb/news/0F9BBB2F57A9822E?p=AWNB	There are as many ways for a science book to go wrong as there are ways for a bacterium to mutate.
161	Superbug closes hospital's intensive care ward	http://infoweb.newsbank.com/resources/doc/nb/news/10546079CFCED4E2?p=AWNB	Professor Grove said Pseudomonas was capable of mutating to increase its resistance to antibiotic treatments and that it most often affected hospital patients whose bodily defences were impaired.
162	Rise of the superbug rekindles interest in natural-born killers - Mind & Body	http://infoweb.newsbank.com/resources/doc/nb/news/10546E9833C27BC0?p=AWNB	Merril says experiments suggest that germ resistance is less of a problem with phages than it is with antibiotics. "Furthermore, the phage-resistant bacteria mutants that were found in these experiments were less pathogenic (disease-producing)," Merril says.
163	GERM warfare	http://infoweb.newsbank.com/resources/doc/nb/news/10D650298BF5E7A8?p=AWNB	In other words, it's our own use of antibiotics that is one of the factors driving resistance. They cure infections and save lives, but they also encourage small mutations in bacteria that help them survive.
164	Antibiotic-resistant bacteria found in meat inspectors	http://www.lexisnexis.com/lnacui2api/api/version1/getDocCui?lni=4M9W-0G00-TXJ2-N1DV&csi=303830&hl=t&hv=t&hnsd=f&hns=t&hgn=t&oc=00240&perma=true	Dr. Panisset believes these mutant bacteria could raise the number of colds and stomach sicknesses the inspectors suffered as well as affect the dosage levels of antibiotics they require to fight other diseases.
165	Antibiotics losing the battle Tuberculosis among infectious diseases reappearing, scientist says	http://www.lexisnexis.com/lnacui2api/api/version1/getDocCui?lni=4M91-7VN0-TW7J-31YG&csi=303830&hl=t&hv=t&hnsd=f&hns=t&hgn=t&oc=00240&perma=true	The overuse of antibiotics has forced bacteria to respond with more and more mutations.
166	U.S. germs invading Canadian hospitals Antibiotics powerless against bacteria	http://www.lexisnexis.com/lnacui2api/api/version1/getDocCui?lni=4M8X-8B80-TW7J-32PF&csi=303830&hl=t&hv=t&hnsd=f&hns=t&hgn=t&oc=00240&perma=true	The invader is a form of staph known as VRE, a mutated antibiotic-resistant version of enteroccoci found normally in the human bowel.
167	Infection experts alarmed by drug-resistant bacteria Hospitals fear deadly complications in some cases	http://www.lexisnexis.com/lnacui2api/api/version1/getDocCui?lni=4M8W-XYR0-TW7J-33CG&csi=303830&hl=t&hv=t&hnsd=f&hns=t&hgn=t&oc=00240&perma=true	However, infection specialists say bacteria are getting tougher and mutating quickly.
168	Third hospital hit by drug-resistant bacteria	http://www.lexisnexis.com/lnacui2api/api/version1/getDocCui?lni=4M8W-XYS0-TW7J-32N0&csi=303830&hl=t&hv=t&hnsd=f&hns=t&hgn=t&oc=00240&perma=true	Infection specialists worry that bacteria are mutating quickly and could soon turn simple infections or surgery into life-threatening events.
169	Battle to curb antibiotic use being won, doctor says Older drugs working better as MDs become more careful about when and how to prescribe them	http://www.lexisnexis.com/lnacui2api/api/version1/getDocCui?lni=4M8C-DRS0-TW7J-3244&csi=303830&hl=t&hv=t&hnsd=f&hns=t&hgn=t&oc=00240&perma=true	This led to so-called superbugs with genetic mutations that make them stronger.
170	Resisting superbug blindness	http://www.lexisnexis.com/lnacui2api/api/version1/getDocCui?lni=4M8C-DTC0-TW7J-3276&csi=303830&hl=t&hv=t&hnsd=f&hns=t&hgn=t&oc=00240&perma=true	Bacteria, Earth's first inhabitants, mutate and, as they do, become increasingly resistant to all the sons and daughters of penicillin.
171	Antibiotic resistant gonorrhea on the rise	http://www.lexisnexis.com/lnacui2api/api/version1/getDocCui?lni=4VHP-WXT0-TXJ2-N160&csi=303830&hl=t&hv=t&hnsd=f&hns=t&hgn=t&oc=00240&perma=true	One of the biggest disadvantages of antibiotics is that diseases can mutate and become resistant to the medication, according to Dr. Tapsall.
172	The new germ warfare; As many as 22 Canadians die every day from hospital-acquired infections. Carly Weeks reports from the front lines of a fight we cannot lose	http://www.lexisnexis.com/lnacui2api/api/version1/getDocCui?lni=5BDN-R401-JCRP-C2R7&csi=303830&hl=t&hv=t&hnsd=f&hns=t&hgn=t&oc=00240&perma=true	When antibiotics are used inappropriately, they kill susceptible bacteria and create the perfect environment for resistant strains to grow, multiply, mutate and spread.
173	The Guardian: Antibiotics: agents lose their cutting edge: INSIDE THE NEWS: Most bacteria that live in us and on us are either harmless or actually essential for life. But they mutate all the time, and those that	http://infoweb.newsbank.com/resources/doc/nb/news/0F27DF6823D49732?p=AWNB	Most bacteria that live in us and on us are either harmless or actually essential for life. But they mutate all the time, and those that
174	The Guardian: Comment & Analysis: Heads in the ground: Medicine's finest days may soon be over. Even if we stop the routine use of antibiotics on farms now, it is too late to prevent resistant bacteria rendering many modern drugs useless	http://infoweb.newsbank.com/resources/doc/nb/news/0F27486F4A124346?p=AWNB	Keeping such bugs in culture without the antibiotic means any mutation that removes the pricy resistance is favoured and, quite soon, they lose their defences.
175	The Guardian: Science: New class of antibiotic could be effective against superbugs	http://infoweb.newsbank.com/resources/doc/nb/news/111B660743834EA8?p=AWNB	But, as bacteria reproduce, their DNA mutates, which can make them immune to the interference of drugs.
176	The Guardian: Radio review	http://infoweb.newsbank.com/resources/doc/nb/news/13932E78A04060D0?p=AWNB	Gonorrhoea has mutated to be resistant to some standard treatments, and the world's first completely resistant strain has been found in Japan.
177	The Guardian: G2: Health: Dr Dillner's dilemma: Should I avoid taking antibiotics?	http://infoweb.newsbank.com/resources/doc/nb/news/142D1A6350E7E950?p=AWNB	Bacteria can evade destruction through random changes (and there is evidence that even before penicillin was invented some bacteria, through spontaneous mutations, were already resistant to it), or by picking up new genetic material from other bacteria.
178	The prescribing of antibiotics can be a tricky business	http://infoweb.newsbank.com/resources/doc/nb/news/10B9E087B3A36410?p=AWNB	As the bacteria reproduce, mutations take place. And probability dictates that eventually bacteria will be born that the antibiotic just won't be able to kill
179	Scientists are looking for new ways to outsmart drug-resistant bacteria that have become a ... Deadly force	http://infoweb.newsbank.com/resources/doc/nb/news/10BC3192D1826C00?p=AWNB	The antibiotics aren't working partly due to a combination of overuse, misuse and the ability of bacteria to mutate.
180	Drug-resistant diseases becoming worldwide public health issue	http://infoweb.newsbank.com/resources/doc/nb/news/127D6E06CB51E748?p=AWNB	The problem has concerned public health officials for years as evidence mounted that bacteria, viruses and parasites were mutating quickly into a form resistant to today's drugs.
181	New, growing threat: Resistance to Cipro antibiotic	http://infoweb.newsbank.com/resources/doc/nb/news/0EF5CC1150859A0C?p=AWNB	*Mutations. Random changes in bacteria's genes may allow them to evade a drug's effects. Descendants of bacteria out-compete their weak peers and spread widely.
182	Gonorrhea mutates to resist antibiotic treatment - Development is 'a public health wake-up call,' CDC official warns	http://infoweb.newsbank.com/resources/doc/nb/news/11E5E99AD6A9E910?p=AWNB	Apparently, Douglas said, it's easier for bacteria to mutate and resist fluoroquinolones than it is for them to become resistant to cephalosporins.
183	Next pandemic' could be man-made - CDC warns about growing threat of antibiotic resistance	http://infoweb.newsbank.com/resources/doc/nb/news/14F3DAA2F83023D8?p=AWNB	However, their common use has caused some bacteria to mutate and become resistant to these drugs, according to the CDC.
184	Researchers report more patients ill with bacterium resistant to antibiotics	http://search.proquest.com/wallstreetjournal/docview/398561978/fulltext/B9783CC047B4413CPQ/43?accountid=14514	The mutant bacteria multiply and pass on their resistant gene to their offspring.
185	Germ Fighter in Household Products Is Found to Generate Resistant Strains	http://search.proquest.com/wallstreetjournal/docview/398628036/fulltext/B9783CC047B4413CPQ/70?accountid=14513	Previously, companies had maintained that triclosan would chemically dissolve bacterial membranes, and wouldn't be susceptible to genetic mutations in bacteria
186	As Bacteria Outsmart Old Antibiotics, Drug Makers Ready New Arsenal	http://search.proquest.com/wallstreetjournal/docview/398729960/fulltext/B9783CC047B4413CPQ/87?accountid=14514	As these bacteria have come under heavy assault from existing drugs, the microbes have mutated into forms that have built up defenses to the antibiotics.
187	Potential Ally Against Anthrax Emerges in Lab	http://search.proquest.com/wallstreetjournal/docview/399016556/C1B578A4F8964D83PQ/143?accountid=14513	Use of PlyG didn't seem to lead to resistance in the RSVF1 strain, even when the researchers added chemicals designed to produce a wide variety of mutant bacteria, which would increase the chance of yielding a resistant type. In the same experiment, resistance to the antibiotics novobiocin and streptomycin jumped by more than 1,000 times.
188	Groups Urge FDA to Curb Animal-Feed Antibiotics	http://search.proquest.com/wallstreetjournal/docview/398979888/C1B578A4F8964D83PQ/181?accountid=14512	The concern is that bacteria that aren't completely killed off by an antibiotic can mutate and become resistant to it.
189	Abbott to seek U.S. OK to market new antibiotic	http://infoweb.newsbank.com/resources/doc/nb/news/0EB36E63160BE109?p=AWNB	The drug is intended to treat a wide array of respiratory diseases, including several that have developed resistance to existing medications
190	Abuse Dilutes Antibiotics' Power - Weakened Efficacy Of Wonder Drugs Becoming Common	http://infoweb.newsbank.com/resources/doc/nb/news/0EB4213C124E875B?p=AWNB	Microbes possess remarkable genetic versatility that enables them to develop new pathenogenic vigor . . . and to develop antibiotic resistance
191	Abuse Dilutes Antibiotics' Power - Weakened Efficacy Of Wonder Drugs Becoming Common	http://infoweb.newsbank.com/resources/doc/nb/news/0EB4213C124E875B?p=AWNB	vancomycin would cause the bacteria to develop resistance
192	Miracle Drugs - Abuse Weakens Power to Cure	http://infoweb.newsbank.com/resources/doc/nb/news/0EB4221385CA4E1B?p=AWNB	drug may not be working because the bacteria have developed a resistance against the antibiotic
193	Antibiotics losing war vs. germs in children	http://infoweb.newsbank.com/resources/doc/nb/news/0EB4237FF74C1BB8?p=AWNB	Over time, microbes can develop resistance to the drug
194	FEARING DRUG RESISTANCE	http://infoweb.newsbank.com/resources/doc/nb/news/0F80844AB3765A20?p=AWNB	about 85 percent of all types of bacteria responsible for U.S. hospital-acquired infections have developed resistance
195	ANTIBIOTICS LOSING POWERS NEW BACTERIA STRAIN IS RESISTANT	http://infoweb.newsbank.com/resources/doc/nb/news/0F80844BA8121472?p=AWNB	Common, easily spread bacteria increasingly are developing strains not treatable by existing antibiotic
196	ANTIBIOTICS LOSE POWER AGAINST ACNE	http://infoweb.newsbank.com/resources/doc/nb/news/0F808CC8897D29F5?p=AWNB	Resistance is thought to have developed because patients don't finish their prescription
197	PROTEIN MAY BECOME WEAPON AGAINST STAPH	http://infoweb.newsbank.com/resources/doc/nb/news/0F80CFD435DB1482?p=AWNB	Many strains of staph already are untreatable with standard drugs, and scientists were shocked to discover last summer that the germ is developing resistance to the antibiotic of last resort, vancomyci
198	IN THE RACE AGAINST DISEASE, THE MICROBES ARE WINNING, AGAIN	http://infoweb.newsbank.com/resources/doc/nb/news/0F80D6ED6C672294?p=AWNB	a full course of treatment is required to help fend off not only recurrent infection but also the development of antibiotic resistance
199	Resistance growing to last gonorrhea treatment option	http://infoweb.newsbank.com/resources/doc/nb/news/140D36C5188F8960?p=AWNB	The most prominent MIC increases were in samples taken from the Western United States and from gay and bisexual men, a pattern seen when resistance to fluoroquinolone developed in the mid 2000s
200	BEWARE THE SUPERBUG;	http://www.lexisnexis.com/hottopics/lnacademic/?shr=t&sfi=AC00NBGenSrch&csi=138805	The superbug, which has developed resistance to no less than seven antibiotics, first appeared in cattle in the late 1980s. It has since spread to poultry, pigs and sheep.
201	EU bans antibiotics in fear of superbugs; 'THE PUBLIC'S HEALTH IS OUR PRIORITY'	http://www.lexisnexis.com/hottopics/lnacademic/?shr=t&sfi=AC00NBGenSrch&csi=138811	EU FARM Ministers last night agreed a ban on the use of four antibiotics in animal feed amid fears that they are helping the development of new super-bugs which could kill humans.
202	Power light that could destroy the superbugs	http://www.lexisnexis.com/hottopics/lnacademic/?shr=t&sfi=AC00NBGenSrch&csi=138816	Bacteria such as tuberculosis (TB) and MRSA, a virulent bacterial infection found mainly in hospitals, have developed incredible resistance to conventional antibiotics and can destroy the immune systems of vulnerable patients.
203	Superbugs getting the better of 'wonder drug'	http://www.lexisnexis.com/hottopics/lnacademic/?shr=t&sfi=AC00NBGenSrch&csi=138837	It was initially effective in all five patients but over a period of weeks tests showed the bacteria were beginning to develop a resistance to the drug.
204	Superbug fear as food poisoning hits 5.5m a year	http://www.lexisnexis.com/hottopics/lnacademic/?shr=t&sfi=AC00NBGenSrch&csi=138846	This is because the bug has mutated and developed a resistance to a similar drug, enroflaxin, used in the rearing of chicken and pigs.
205	SUPERBUG APOCALYPSE	http://www.lexisnexis.com/hottopics/lnacademic/?shr=t&sfi=AC00NBGenSrch&csi=138861	Well, the crucial first fact to realise is that the more you challenge infectious microbes with one dose of antibiotics after another, the greater the chance of resistance developing.
206	SUPERBUG APOCALYPSE	http://www.lexisnexis.com/hottopics/lnacademic/?shr=t&sfi=AC00NBGenSrch&csi=138862	Turkeys and other forms of poultry are still, in many places, pumped full of antibiotics. This means that they can develop particularly nasty forms of salmonella, mutated superbugs, that can pass into the human food chain.
207	Hospital superbug spreads to animals	http://www.lexisnexis.com/hottopics/lnacademic/?shr=t&sfi=AC00NBGenSrch&csi=138861	There really is a big question mark over the whole area.' Hospitals are struggling to defeat MRSA - methicillin resistant staphylococcus aureus - because it is has developed a resistance to penicillin.
208	Hospital superbug deaths 'to double as MRSA beats jabs'	http://www.lexisnexis.com/hottopics/lnacademic/?shr=t&sfi=AC00NBGenSrch&csi=138862	'It's only a matter of time before bacteria that cannot be killed by vancomycin develop in some areas.
209	TB superbug is spreading, experts warn	http://www.lexisnexis.com/hottopics/lnacademic/?shr=t&sfi=AC00NBGenSrch&csi=138872	'This increases the likelihood of drug resistance developing, and with treatment lasting six months or more, it is particularly difficult to ensure the course is completed by those in particular at-risk groups such as the homeless and injecting drug users.'
210	Cream that could give MRSA a taste of its own medicine	http://www.lexisnexis.com/hottopics/lnacademic/?shr=t&sfi=AC00NBGenSrch&csi=138882	He also warned there was no guarantee that bacteria would not develop resistance to the viruses in the same way as they have to antibiotics.
211	Doctors are 'wasting' antibiotics on colds	http://www.lexisnexis.com/hottopics/lnacademic/?shr=t&sfi=AC00NBGenSrch&csi=138883	Overuse of antibiotics can also cause harmful bacteria to develop resistance, making it harder to cure them in future.
212	Health fears grow over deadly superbug infecting 32 farms	http://www.lexisnexis.com/hottopics/lnacademic/?shr=t&sfi=AC00NBGenSrch&csi=138890	The 'super E coli' is thought to have developed a high degree of resistance to antibiotics through their use in intensive livestock operations.
213	Urgent hunt for close contacts of TB patient	http://www.lexisnexis.com/hottopics/lnacademic/?shr=t&sfi=AC00NBGenSrch&csi=138896	The drug resistant strain is thought to have developed through a failure by patients to adhere to the six month course of antibiotics used to treat ordinary TB.
214	Wonder gel that spells the end for superbugs	http://www.lexisnexis.com/hottopics/lnacademic/?shr=t&sfi=AC00NBGenSrch&csi=138901	The breakthrough discovery a compound known as XF-73 continued to destroy the deadly superbug long after it would have developed resistance to antibiotics.
215	Could a dab of gel to the Nose beat MRSA?	http://www.lexisnexis.com/hottopics/lnacademic/?shr=t&sfi=AC00NBGenSrch&csi=138902	The superbug did not develop any resistance to the treatment even after being exposed to it 55 times.
216	HOW TOOTHPASTE IS SPEEDING UP THE SPREAD OF SUPERBUGS	http://www.lexisnexis.com/hottopics/lnacademic/?shr=t&sfi=AC00NBGenSrch&csi=138917	Some strains of the hospital superbug MRSA have also developed low levels of triclosan resistance.
217	GOLDEN AGE OF ANTIBIOTICS IS ENDING, SAYS TOP PROFESSOR	http://www.lexisnexis.com/hottopics/lnacademic/?shr=t&sfi=AC00NBGenSrch&csi=138932	He said complacency set in during the 1970s and 1980s when antibiotics could have been used more wisely to stave off resistance to the drugs developing.
218	DESIGNER' ANTIBIOTICS TO HALT RISE OF SUPERBUGS	http://www.lexisnexis.com/hottopics/lnacademic/?shr=t&sfi=AC00NBGenSrch&csi=138935	Now, a new wave of drugs is being developed that target a single type of bacteria, in the hope they will slow the rise of resistance.
219	The never-ending bacteria battle Scientists fight back as organisms outwit antibiotics	http://infoweb.newsbank.com/resources/doc/nb/news/0ED5629E06CF88C1?p=AWNB	Scientists attribute the development of antibiotic-resistant bacteria mainly to misuse of the medicines
220	Arkansas infectious-disease deaths rise - State follows nation in recording increase over the last decade	http://infoweb.newsbank.com/resources/doc/nb/news/0ED3D6754EB6208C?p=AWNB	Strains of streptococcus bacteria that have developed a resistance to penicillin are blamed for an increase in pneumonia, ear infections and meningitis, both fatal and nonfatal
221	Drug-resistant TB finds fertile ground in Latvia Keeping infected patients in treatment is key factor in controlling outbreak	http://infoweb.newsbank.com/resources/doc/nb/news/0ED3D96ACA6479F7?p=AWNB	Without further treatment, the bacteria in Mrs. Jegorova's ravaged lungs could develop resistance to antibiotics, mutating into a deadly new strain far more difficult to cure
222	Discovery could lead to staph vaccine - Protein shows promise in mice tests, scientists say	http://infoweb.newsbank.com/resources/doc/nb/news/0ED3DAAF3917F7AF?p=AWNB	Many strains of staph already are untreatable with standard drugs, and scientists were shocked to discover last summer that the germ is developing resistance to the antibiotic of last resort, vancomycin
223	Antibiotics' use in farm animals draws scrutiny	http://infoweb.newsbank.com/resources/doc/nb/news/0ED3DAC537F9B2D4?p=AWNB	Other researchers are conducting controlled experiments to measure how resistance develops in livestock
224	Drug defiance - Resistance to new medications is an emerging problem in battle against the AIDS virus	http://infoweb.newsbank.com/resources/doc/nb/news/0ED3DAD12D8C9AC0?p=AWNB	AIDS drug resistance develops much the same way antibiotic resistance does
225	Drug defiance - Resistance to new medications is an emerging problem in battle against the AIDS virus	http://infoweb.newsbank.com/resources/doc/nb/news/0ED3DAD12D8C9AC0?p=AWNB	The same pills that treat an AIDS virus infection, if taken improperly, can encourage the development of drug-defiant strains
226	Study warns of microbe threat - World Health Organization says antibiotic overuse creating resistant bugs	http://infoweb.newsbank.com/resources/doc/nb/news/0ED822CED391F018?p=AWNB	It becomes a problem only when disease-causing organisms develop the ability to fight off otherwise disease-curing drugs
227	New drug added to antibiotic arsenal	http://infoweb.newsbank.com/resources/doc/nb/news/0EAF45401C9C8CEB?p=AWNB	And doctors should not use Synercid when other antibiotics will do because overuse will simply hasten bacteria's inevitable development of resistance against this new drug
228	`Jumping Genes' Blamed for Resistant Bacteria: [Bulldog Edition]	http://search.proquest.com/latimes/docview/280714520/E503DAF8B2A24B61PQ/27?accountid=14514	Infectious bacteria equipped with "jumping genes" are becoming increasingly resistant to antibiotics, forcing development of new treatment strategies for several diseases
229	Curbing antibiotic overuse	http://infoweb.newsbank.com/resources/doc/nb/news/0F8916C572E16BEE?p=AWNB	Unfortunately, ongoing exposure to antibiotics has allowed many forms of bacteria to develop resistance to these important medications
230	EDITORIAL - Ban antibiotics for livestock	http://infoweb.newsbank.com/resources/doc/nb/news/10BCF20F96270D10?p=AWNB	Since then, about 21 percent of the bacteria in human food poisoning cases have developed resistance to Cipro, says the Centers for Disease Control.
231	EAR INFECTIONS ACCOUNT FOR AT LEAST 25 PERCENT OF PRESCRIBED U.S. - ANTIBIOTIC USE, BUT THE DRUGS ARE SHOWING SIGNS OF LOSING THEIR - POWER. - Germs' warfare	http://infoweb.newsbank.com/resources/doc/nb/news/1186B8F7AD704F18?p=AWNB	Even with perfect compliance - no missed doses, no spit-up pink syrup - antibiotic use pushes bacteria to develop resistance
232	What you don't know about antibiotics can hurt you	http://infoweb.newsbank.com/resources/doc/nb/news/0ED7B51966949DDD?p=AWNB	Of the patients who failed to finish their prescription, 94 percent said they feared the development of bacterial resistance
233	CF patients may soon get inhaled drug	http://infoweb.newsbank.com/resources/doc/nb/news/0ED7B8D8A91AA7C5?p=AWNB	to answer lingering questions about side effects and drug resistance that may develop in continuous users
234	Antibiotic aimed at ending threat of drug-resistant bacteria is OK'd	http://infoweb.newsbank.com/resources/doc/nb/news/0ED7BABBA6F4018D?p=AWNB	overuse will simply hasten bacteria's inevitable development of resistance against this new drug
235	ANTIBIOTIC RESISTANCE / FDA must evaluate drug use on healthy farm animals	http://infoweb.newsbank.com/resources/doc/nb/news/0EE192AB412A43C7?p=AWNB	There is no proof that the routine practice of farmers and ranchers' giving healthy cows, pigs and chickens antibiotics to help them grow faster leads to the development of antibiotic-resistant bugs harmful to human health
236	FDA OKs pill for travelers' ills - About 400f Americans visiting Mexico become sick	http://infoweb.newsbank.com/resources/doc/nb/news/102D9FD16BAB19B2?p=AWNB	DuPont's studies suggest it develops little resistance in the bacteria it helps the body fight
237	HEALTH & MEDICINE - Compound may fight antibiotic resistance - Researchers say new finding in soil could be critical in the ongoing battle against infections	http://infoweb.newsbank.com/resources/doc/nb/news/111B45F95BF04058?p=AWNB	That increased the likelihood that any promising compound they discovered would be something for which the bacteria had not yet developed a resistance
238	Drug-Resistant Strain Of TB Raises Red Flag In Medical World; Is Charity The Cure?; Lilly exec says science, economics aren't enough to solve the problem	http://www.lexisnexis.com/lnacui2api/api/version1/getDocCui?lni=4C1W-4P20-01J8-W4VC&csi=270944,270077,11059,8411&hl=t&hv=t&hnsd=f&hns=t&hgn=t&oc=00240&perma=true	With patients developing resistance to drugs, what's a drug maker to do?
239	Drug-Resistant Strain Of TB Raises Red Flag In Medical World; Is Charity The Cure?; Lilly exec says science, economics aren't enough to solve the problem	http://www.lexisnexis.com/lnacui2api/api/version1/getDocCui?lni=4C1W-4P20-01J8-W4VC&csi=270944,270077,11059,8411&hl=t&hv=t&hnsd=f&hns=t&hgn=t&oc=00240&perma=true	MDR-TB develops in places where patients do use drugs but the bacteria mutate to resist them
240	Developments in Brief Strains of Gonorrhea Prove Drug-Resistant: [Home Edition]	http://search.proquest.com/latimes/docview/292756966/70C74B7A35334FB8PQ/19?accountid=14512	Bacteria that cause gonorrhea are quickly developing resistance to another antibiotic
241	`Jumping Genes' Blamed for Resistant Bacteria: [Bulldog Edition]	http://search.proquest.com/latimes/docview/280714520/E503DAF8B2A24B61PQ/27?accountid=14513	In the United States, resistant bacteria are very common in hospitals, where they have developed the necessary mechanisms to resist a variety of antibiotics
242	HEALTH Kids and Antibiotics Parents, Doctors Worried Sick About Overuse of Wonder Drugs: [Home Edition]	http://search.proquest.com/latimes/docview/280761515/E503DAF8B2A24B61PQ/30?accountid=14512	For example, haemophilius influenza, one of the most common microorganisms causing ear infections in infants and children, has developed a resistance in 20% to 60% of cases to ampicillin and amoxicillin, two penicillin derivatives
243	Health Officials Call for New Fight on Drug-Resistant Types of TB: [Home Edition]	http://search.proquest.com/latimes/docview/281655467/E503DAF8B2A24B61PQ/60?accountid=14512	remaining TB bacteria developed resistance to the drug
244	Cover Story Take Two Herbs and Call Me in the Morning Health: Your child is teething or has an earache? Responding to growing demand from parents, many doctors are prescribing homeopathic remedies. But they caution that such treatments are not a cure-all.: [Home Edition]	http://search.proquest.com/latimes/docview/282257431/E503DAF8B2A24B61PQ/87?accountid=14512	And bacteria have developed a resistance to antibiotic
245	Antiseptic Curbs Blindness, UCLA Researchers Say Medicine: Kenya study shows form of Betadine used on newborns prevents infections. It is safer and cheaper than widely used silver nitrate, research finds.: [Home Edition]	http://search.proquest.com/latimes/docview/292979901/E503DAF8B2A24B61PQ/99?accountid=14512	Bacteria also do not seem to develop resistance to it, as they do to antibiotics
246	Drug-Resistant Bacteria Pose an Increasing Threat Health: About 13,000 die in U.S. each year from germs that have developed a tolerance for common antibiotics.: [Home Edition]	http://search.proquest.com/latimes/docview/293080263/F07FD7ADAC4943C9PQ/102?accountid=14513	Although resistance went up only slowly through the 1960s, some bacteria began developing strong resistance in the 1970s
247	Antibiotics Overprescribed, Study Finds: [Orange County Edition]	http://search.proquest.com/latimes/docview/421347930/F07FD7ADAC4943C9PQ/134?accountid=14514	identify where they can decrease unnecessary antimicrobial use by improving diagnostic methods or communicating with patients concerning the lack of benefit, potential adverse effects, and development of resistance associated with such therapy."
248	Scientists Find New Way to Foil Staph Bacteria; Medicine: Instead of killing germs, immunization blocks toxin release. Resistance is less likely to develop.: [Home Edition]	http://search.proquest.com/latimes/docview/421285749/F07FD7ADAC4943C9PQ/143?accountid=14512	As soon as researchers introduce a new antibiotic, bacteria begin developing resistance to it
249	The Superbug Threat: [Home Edition]	http://search.proquest.com/latimes/docview/421249581/F07FD7ADAC4943C9PQ/145?accountid=14512	But there's little doubt that "growth promoters," antibiotics in livestock feed, help foster the development of new strains of superbugs
250	SCIENCE FILE; Science in Brief; Bacterium Resistant to Antibiotic Kills Another Hospital Patient: [Home Edition]	http://search.proquest.com/latimes/docview/421365690/F07FD7ADAC4943C9PQ/157?accountid=14512	the antibiotic of last resort for bacteria that have developed resistance to all others
251	SUNDAY REPORT; Biotech Battlefield: Profits vs. Public; Private companies are refusing to share the genetic code of a deadly staph bacterium. They say it cost them millions to discover, but officials say the data are needed to avert a public health crisis.: [Home Edition]	http://search.proquest.com/latimes/docview/421377246/F07FD7ADAC4943C9PQ/158?accountid=14512	But in recent years many organisms have developed a resistance to these drugs
252	Parent Pressure Cited in Overuse of Antibiotics: [Orange County Edition]	http://search.proquest.com/latimes/docview/421497694/F07FD7ADAC4943C9PQ/159?accountid=14512	because bacteria have developed resistance to them
253	It's a Matter of Health: [Home Edition]	http://search.proquest.com/latimes/docview/421376450/F07FD7ADAC4943C9PQ/161?accountid=14512	Several strains of bacteria have in the last decade developed resistance to the most powerful antibiotics
254	It's a Matter of Health: [Home Edition]	http://search.proquest.com/latimes/docview/421376450/F07FD7ADAC4943C9PQ/161?accountid=14513	These mutant strains of bacteria have developed immunities to antibiotics and can infect humans who handle raw meat and poultry,
255	Commentary; Will We Win the Fight Against the Superbugs?; Health: More research, funding and consumer awareness are needed to beat resistance to antibiotics.: [Home Edition]	http://search.proquest.com/latimes/docview/421426518/F07FD7ADAC4943C9PQ/167?accountid=14512	required to help fend off not only recurrent infection but also the development of antibiotic resistance
256	INSIDE STORY; The Enemy Within; You Probably Don't Want to Know What Dr. David Pegues Knows About Hospitals, About Those Nasty, Drug- Resistant Microbes Lying in Wait. But What the Germ Warrior Knows Just Might Save Your Life.: [Home Edition]	http://search.proquest.com/latimes/docview/421625290/F07FD7ADAC4943C9PQ/169?accountid=14514	Once they develop, hospital-bred superbugs may attack patients rendered all but defenseless by disease or by medical interventions
257	U.S. STRIKES BACK; ANTHRAX SCARE; COLUMN ONE; Cure May Be Health Hazard; Many doctors bend to pressure from patients who want antibiotics after anthrax scares. Misuse could raise the dangers of resistance.: [Home Edition]	http://search.proquest.com/latimes/docview/421641511/D09D37E1A6284632PQ/203?accountid=14512	Even those who don't take Cipro could develop infections resistant to it
258	RESPONSE TO TERROR; Health Experts Fear Cipro Risks as Drug Given to 7,000 in N.Y.: [Home Edition]	http://search.proquest.com/latimes/docview/421674917/D09D37E1A6284632PQ/206?accountid=14512	Bacteria can grow resistant to the drug, leading to the development of infections that are hard to kill
259	The State; Resistance Leads to Fewer Options for Treating STD; Health: Officials fear that California doctors may be forced to stop prescribing Cipro and other common antibiotics in gonorrhea cases.: [Home Edition]	http://search.proquest.com/latimes/docview/421691532/D09D37E1A6284632PQ/218?accountid=14513	Gonorrhea, considered a "smart" bacteria, long ago developed mechanisms to resist other antibiotics, including penicillin.
260	Los Angeles; County Orders Reports on Illness; Health: Starting next month, doctors must add invasive pneumococcal disease to the list of ailments they track. Officials hope to assess resistance to antibiotics.: [HOME EDITION]	http://search.proquest.com/latimes/docview/421908965/D09D37E1A6284632PQ/233?accountid=14512	Officials are worried that the sometimes fatal disease, which causes meningitis and blood infections, will develop resistance to other medications
261	California; State Senate Approves Measure to Monitor Livestock; Bill would mandate that antibiotics usage be reported to help study how it affects growing resistance to the drugs.: [HOME EDITION]	http://search.proquest.com/latimes/docview/421796568/D09D37E1A6284632PQ/247?accountid=14512	The FDA already has acknowledged that at least one class of antibiotics used in poultry -- fluoroquinolones -- is partially to blame for the development of antibiotic-resistant infections in humans.
262	MEDICINE; Drug-resistant bugs find sanctuary in our noses; As many as 2 million Americans may be harboring the resilient staph strain.: [HOME EDITION]	http://search.proquest.com/latimes/docview/422011414/D09D37E1A6284632PQ/276?accountid=14512	Uncompleted courses of treatment don't wipe out the infection and can strengthen the bacteria, allowing it to develop resistance to another antibiotic.
263	Drug-resistant gonorrhea spreading rapidly in U.S.; Changes in treatment are recommended to combat the increase.: [HOME EDITION]	http://search.proquest.com/latimes/docview/422131314/D09D37E1A6284632PQ/299?accountid=14514	bacterium has been developing resistance since the first drugs to fight it
264	TURKEY'S LEAN PROFILE; Bad medicine?; Treating poultry (and other food animals) with antibiotics could lead to some serious health consequences for human beings.	http://search.proquest.com/latimes/docview/422226321/7310D771D6344006PQ/335?accountid=14513	Antibiotic resistance develops when antibiotics kill off only some of the bacteria they're supposed to
265	THE WORLD; 'Ecological sacrifice zone' in India; Water in a town with pharmaceutical plants that supply the U.S. is tainted with antibiotics and other strong drugs.	http://search.proquest.com/latimes/docview/422294508/7310D771D6344006PQ/337?accountid=14513	But in recent years many bacteria have developed resistance to the drug
266	New life for old bacteria fighters; Remedies once called risky are reconsidered as pathogens outsmart modern antibiotics.	http://search.proquest.com/latimes/docview/613561371/7310D771D6344006PQ/354?accountid=14512	bacteria have not had much chance to develop resistance to them
267	New life for old bacteria fighters; Remedies once called risky are reconsidered as pathogens outsmart modern antibiotics.	http://search.proquest.com/latimes/docview/613561371/7310D771D6344006PQ/354?accountid=14513	Overuse continues to be a problem with antibiotics because of bacteria's ability to mutate and develop resistance in response to continued exposure to a drug.
268	IN THE WORKS; BACTERIA BATTLERS; With antibiotic resistance rising, scientists look to frogs, roaches and elsewhere for new weapons.	http://search.proquest.com/latimes/docview/754971015/7310D771D6344006PQ/356?accountid=14513	so there's little incentive to develop resistance
269	Showdown looms over antibiotics; A federal proposal would sharply limit their use in animals raised for food.	http://search.proquest.com/latimes/docview/821895595/7310D771D6344006PQ/358?accountid=14513	The animals developed a resistant bacteria
270	Antibiotics, animals and us	http://search.proquest.com/latimes/docview/993837463/7310D771D6344006PQ/373?accountid=14512	Doctors have been growing more cautious about prescribing antibiotics for humans because overuse fosters the development of drug-resistant bacteria
271	POULTRY DRUGS MAY BE BANNED	http://infoweb.newsbank.com/resources/doc/nb/news/0EB72F039BBB1438?p=AWNB	Resistance develops when antibiotics are overused
272	AMA WARNS OF DRUG MISUSE	http://infoweb.newsbank.com/resources/doc/nb/news/0EF3FB82CFEAA4A7?p=AWNB	The AMA also raises the specter of misuse contributing to the development of drug-resistant bacteria strains
273	U.S. HEALTH: Resistant gonorrhea cases soar - The Center for Disease Control and Prevention reported an increase in antibiotic-resistant gonorrhea across the country -- and figures show Miami is hit hard.	http://infoweb.newsbank.com/resources/doc/nb/news/1187DDF7E2E59FD0?p=AWNB	gonorrhea tends to develop resistance to antibiotics quickly
274	ARE YOU STAPH SAVVY?	http://infoweb.newsbank.com/resources/doc/nb/news/11CE3AA5A103EF50?p=AWNB	That’s how the development of multidrug resistance works
275	RESEARCH: Helping antibiotics retain effectiveness	http://infoweb.newsbank.com/resources/doc/nb/news/12541CA8E7A77958?p=AWNB	two Northwestern University researchers may have found a way to prevent or slow the development of drug resistance
276	ENVIRONMENT Beach may hold harmful bacteria	http://infoweb.newsbank.com/resources/doc/nb/news/1268C053E0AEA360?p=AWNB	MRSA, or Methicillin-resistant staphylococcus aureus, is a form of the bacteria that is more dangerous because it has developed resistance to most antibiotics
277	Antibiotics overuse creates lethal drug-resistant bugs, say experts - Overuse of antibiotics by private doctors and hospitals is causing lethal diseases to mutate and become resistant to the drugs, say experts.	http://infoweb.newsbank.com/resources/doc/nb/news/13B93D44364B5E48?p=AWNB	Serious infections like Klebsiella, a bacteria that causes ventilator-dependent pneumonia, wound infections and meningitis and has recently developed resistance to most of the antibiotics used to fight it
278	Emerging diseases may be unstoppable, researchers warn	http://infoweb.newsbank.com/resources/doc/nb/news/0EFD65F7A0ADF337?p=AWNB	Yet that is the worst strategy, he said, because it gives the bacteria an opportunity to develop resistance to that antibiotic.
279	Journal urges antibiotic limits - Research links livestock intake with superbugs in meat	http://infoweb.newsbank.com/resources/doc/nb/news/0EFD146EC7E5135E?p=AWNB	Dr. Jeff Bender, professor of veterinary public health at the University of Minnesota, said many factors affect whether bacteria cause illness or develop drug resistance, including environment and type of animal.
280	PATH OF GREAT RESISTANCE Overuse of antibiotics strengthens bacteria and weakens the immune system - a d eadly combination	http://www.lexisnexis.com/lnacui2api/api/version1/getDocCui?lni=44G8-6BB0-00T0-G20C&csi=151550&hl=t&hv=t&hnsd=f&hns=t&hgn=t&oc=00240&perma=true	"If you are put on [an antibiotic], and the germ is not there, there is no way for anthrax to develop a resistance to it," explains Dr. Tamar Barlam of the Antibiotic Resistance Project for the Center for Science in the Public Interest.
281	Scientists Tell of Promise Seen In a New Class of Antibiotics	http://search.proquest.com/nytimes/docview/110745067/fulltextPDF?accountid=14512	Infections caused by bacteria have become an increasingly important problem, in part because they have developed resistance to antibiotics
282	THE DOCTOR'S WORLD; Staying Ahead of Microbes: New Progress	http://search.proquest.com/nytimes/docview/426569580/82258D084A804B66PQ/41?accountid=14512	But continued success depends on keeping ahead of the microbes that develop resistance.
283	After Causing Worry in the East, A Germ Has Surfaced in the West: A death in California is traced to a strain that resists drugs.	http://search.proquest.com/nytimes/docview/109450162/fulltextPDF?accountid=14512	The organism has also developed a resistance to most antibiotics
284	Experts Warn Lawmakers of Wave of 'Superbugs'	http://search.proquest.com/nytimes/docview/109851568/fulltextPDF?accountid=14513	A doctor should no longer prescribe an antibiotic thinking that it can do no harm, he said, because the more often bacteria are exposed to a drug, the more likely they are to develeop resistance
285	When Antibiotics Are Used Too Often: [Interview]	http://search.proquest.com/nytimes/docview/110047089/fulltextPDF?accountid=14512	These children are at greater risk of developing bacteria that are resistant to all antibiotics
286	Drug Agency Approves Antibiotic	http://search.proquest.com/nytimes/docview/110012114/fulltextPDF?accountid=14513	Resistance to Synercid could develop as well
287	Antibiotic Misuse Turns Treatable to Incurable	http://search.proquest.com/nytimes/docview/91377476/fulltextPDF?accountid=14513	That use results in the development of drug-resistant germs in or near livestock
288	A Regimen for Resistance	http://search.proquest.com/nytimes/docview/431857285/66332E4F6C4440CAPQ/290?accountid=14512	In addition, their unwarranted use helps drug-resistant bacteria to develop, the authors said.
289	Resistance Builds To Cipro, Study Says	http://search.proquest.com/nytimes/docview/92120385/fulltextPDF?accountid=14512	Two Taiwan hospitals found that a powerful strain of salmonella developed a resistance to the antibiotic Cipro
290	Bacteria Run Wild, Defying Antibiotics	http://search.proquest.com/nytimes/docview/92783811/fulltextPDF?accountid=14514	Antbiotic-resistant bacteria often develop when people take many antibiotics
291	Have Germs, Will Travel	http://search.proquest.com/nytimes/docview/848070798/fulltextPDF?accountid=14512	And we need to support a world-wide effort to prevent TB bacteria from developing further drug-resistance
292	TB Tests Show Promise, but Flaws Limit Progress	http://search.proquest.com/nytimes/docview/433628701/14101F014CDC446BPQ/458?accountid=14513	Tuberculosis resistance develops when drugs are misused or mismanaged
293	Citing Drug Resistance, U.S. Restricts More Antibiotics for Livestock: [National Desk]	http://search.proquest.com/nytimes/docview/913659516/fulltext/2D0B1B1F500D41C9PQ/565?accountid=14512	The drugs' use in agriculture has, according to many microbiologists, led to the development of bacteria that are resistant to their effects, a development that many doctors say has cost thousands of lives.
294	Let's Gang Up on Killer Bugs: [Op-Ed]	http://search.proquest.com/nytimes/docview/1223786019/fulltext/2D0B1B1F500D41C9PQ/581?accountid=14512	it quickens the pace at which bacteria develop resistance
295	F.D.A. Restricts Antibiotics Use For Livestock: [National Desk]	http://search.proquest.com/nytimes/docview/1467049414/BD1060669D1248AAPQ/611?accountid=14512	Health officials have warned since the 1970s that overuse of antibiotics in animals was leading to the development of infections resistant to treatment in humans
296	The Rise of Antibiotic Resistance: [Editorial]	http://search.proquest.com/nytimes/docview/1522996648/BD1060669D1248AAPQ/624?accountid=14512	Still, it is clear that major resistance problems have already developed,
297	New blemish on use of antibiotics for acne	http://infoweb.newsbank.com/resources/doc/nb/news/0EFDAA83737657FA?p=AWNB	Several recent studies show that acne-causing bacteria, Propionibacterium acnes or P. acnes have developed strains that resist both topical and oral antibiotics.
298	Microbes may soon win the war against humans	http://infoweb.newsbank.com/resources/doc/nb/news/0EFDA44275ABCFED?p=AWNB	"Clearly, the rate at which resistant organisms develop is not solely a function of the use of (antibiotics) in humans"
299	Bacteria growing resistant to Cipro	http://infoweb.newsbank.com/resources/doc/nb/news/0F94FA0D93973324?p=AWNB	Resistance can develop when a drug is used repeatedly against the same germ
300	Bacteria growing resistant to Cipro	http://infoweb.newsbank.com/resources/doc/nb/news/0F94FA0D93973324?p=AWNB	Resistance can develop when a drug is used repeatedly against the same germ, which may eventually mutate to outwit the drug.
301	From savior to assassin How killer germs have defeated our last antibiotic	http://infoweb.newsbank.com/resources/doc/nb/news/0FF53726CC2944B3?p=AWNB	The development of resistance wasn't just probable. It was predetermined
302	Digging up genetic clues to take on super-germs	http://infoweb.newsbank.com/resources/doc/nb/news/10F44DDD202416A0?p=AWNB	The findings, published in the journal Science, could help explain why bacteria so quickly develop resistance to antibiotics, and why drug companies must constantly develop new ones.
303	Study finds infections growing from regular and 'super' staph	http://infoweb.newsbank.com/resources/doc/nb/news/11D418469FE690A0?p=AWNB	MRSA is more difficult to treat than other infections because it has developed resistance to most commonly used antibiotics.
304	As 'superbug' rises, new antibiotics fall	http://infoweb.newsbank.com/resources/doc/nb/news/11CB8AAFB20EC608?p=AWNB	The inevitable development of resistant strains of bacteria also tends to limit the long-term use of most antibiotics.
305	Follow-up antibiotic may help to eliminate repeated infections - KID CARE	http://infoweb.newsbank.com/resources/doc/nb/news/1421B774212E33A0?p=AWNB	Many serious infections in children arise from these germs and the development of vaccines has greatly reduced their incidence.
306	Follow-up antibiotic may help to eliminate repeated infections - KID CARE	http://infoweb.newsbank.com/resources/doc/nb/news/1421B774212E33A0?p=AWNB	Fortunately, Group A strep is still sensitive to penicillin and has not developed resistance.
307	ANTIBIOTICS ARE OVERPRESCRIBED	http://infoweb.newsbank.com/resources/doc/nb/news/151992DEB7D68670?p=AWNB	Otherwise, there can be a recurrence of the infection or surviving bacteria may develop resistance to the antibiotic.
308	DRUG-RESISTANT BACTERIA WINNING A HEALTH BATTLE	http://infoweb.newsbank.com/resources/doc/nb/news/0EB2A12251BA7FA9?p=AWNB	bacteria, which cause diarrhea, pneumonia, ear infections, tuberculosis, gonorrhea and many other diseases, have developed resistance to medicine's arsenal of antibiotic drugs at an alarming rate.
309	AREA CASE HIGHLIGHTS TOUGH BACTERIA STRAIN	http://infoweb.newsbank.com/resources/doc/nb/news/0EB32EF94B7D7403?p=AWNB	But because of overuse, more and more bacteria are developing resistance to vancomycin - one step away from immunity.
310	TO COMBAT RESISTANCE, SCIENTISTS URGE MORE PRUDENT USE OF ANTIBIOTICS	http://infoweb.newsbank.com/resources/doc/nb/news/0EB32FF9579548C8?p=AWNB	A growing number of germs are developing resistance to the antibiotic of last resort, vancomycin.
311	NEW CONCERN SEEN ON ANTIBACTERIALS \ THE AGENT IN MANY SOAPS AND LOTIONS COULD BE MAKING GERMS MORE DRUG-RESISTANT, A STUDY SAID.	http://infoweb.newsbank.com/resources/doc/nb/news/0EB3305175C30C8E?p=AWNB	But now that they have determined that the compound works on a specific genetic site, scientists said the potential for developing resistance was much higher.
312	WASHOUTS IN THE WAR ON GERMS? WHILE ANTIBACTERIAL PRODUCTS ARE POPULAR, STUDIES INDICATE THAT THEY DO NO BETTER THAN SOAP AND WATER. SOME SCIENTISTS EVEN WORRY THAT THE PRODUCTS MAY DO MORE HARM THAN GOOD.	http://infoweb.newsbank.com/resources/doc/nb/news/0EB735FBA46790F4?p=AWNB	The more bacteria are exposed to them, he said, the more likely they are to develop ways of eluding them.
313	PROPOSED BAN OF ANTIBIOTICS FOR POULTRY GAINS CRITICISM	http://infoweb.newsbank.com/resources/doc/nb/news/0EB7367CAF99CC2E?p=AWNB	Resistance develops when antibiotics are overused, both by doctors treating people and by farmers treating animals.
314	FDA bans antibiotic's use in poultry	http://infoweb.newsbank.com/resources/doc/nb/news/10BABC4A8DEF13E0?p=AWNB	Use of enrofloxacin in poultry does not eliminate campylobacter from the birds but instead helps develop bacteria resistant to this type of drug, Crawford said.
315	Merck's promising new bacteria-killer - The compound is in the early stages of testing.	http://infoweb.newsbank.com/resources/doc/nb/news/111BA2AAD4DEA6C0?p=AWNB	"Every time we have had a superdrug developed, the bacteria have developed resistance,"
316	Who gets the antibiotics? - When the drugs are used in animal feed, scientists say, they lose effectiveness in humans. A new bill aims to curb such use; farmers oppose it.	http://infoweb.newsbank.com/resources/doc/nb/news/12AB82CD1458A610?p=AWNB	Microbes can develop resistance any time antibiotics are used,
317	Evolution hints at a superbug strategy	http://infoweb.newsbank.com/resources/doc/nb/news/139E57F3EB92C130?p=AWNB	so infectious bugs can pick up resistance-conferring genes from normal friendly bacteria, which are also under pressure to develop resistance when patients get antibiotics.
318	FDA approves long-needed new antibiotic	http://infoweb.newsbank.com/resources/doc/nb/news/0F364F4A33B80033?p=AWNB	And doctors should not use Synercid when other antibiotics will do, because overuse will simply hasten bacteria's inevitable development of resistance against this new drug, the FDA warned.
319	WHO raising red flag over bugs that resist drugs	http://infoweb.newsbank.com/resources/doc/nb/news/0F365732126FE0D1?p=AWNB	The World Health Organization warned Monday that increasingly drug-resistant infections in rich and developing nations alike are threatening to make once-treatable diseases incurable
320	Health experts seek to rein in antibiotics - Drug overuse, misuse linked to 'super germs'	http://infoweb.newsbank.com/resources/doc/nb/news/0F369C60E4449F32?p=AWNB	hat prevents the development of resistance to more complex antibiotics.
321	New antibiotic fails to halt fast-evolving bacteria strain	http://infoweb.newsbank.com/resources/doc/nb/news/0F369C6A145F5F9E?p=AWNB	Of the five Chicago patients who developed Zyvox-resistant infections, two died.
322	End the misuse of antibiotics	http://infoweb.newsbank.com/resources/doc/nb/news/0F369C6AF805FCC9?p=AWNB	If the illness does not respond to that treatment, physicians will slowly move on to the next drug, which should stem the development of resistance to more complex antibiotics.
323	Antibiotic addiction	http://infoweb.newsbank.com/resources/doc/nb/news/137CFD373A67EB68?p=AWNB	Bacteria develop resistance to antibiotics through natural selection.
324	An Overdose of Wonder Drugs	http://infoweb.newsbank.com/resources/doc/nb/news/0EB4EE20CD25F187?p=AWNB	Because these antibiotic producers can destroy any sensitive microbes living nearby, the soil-dwelling organisms that developed resistance would have a clear survival advantage
325	Bacteria resisting drug treatment - Infection outbreak elsewhere appears among gay men in S.F.	http://infoweb.newsbank.com/resources/doc/nb/news/0F8EEB36D7D25210?p=AWNB	Dr. Marcus Conant, a dermatologist and one of the first doctors to treat AIDS patients, said he's had two patients develop resistant staph recently, both of whom had weakened immune systems.
326	SAN FRANCISCO - CDC concerned about drug-resistant TB - San Francisco has highest rate of disease in country	http://infoweb.newsbank.com/resources/doc/nb/news/1108EE3BA77D7B58?p=AWNB	But it's critical that patients adhere to a strict drug-maintenance schedule, or they risk developing a resistance to the drugs. P
327	Science to the rescue: Sunnyvale company tapped for national effort to defeat bacterium that kills more in U.S. than AIDS	http://infoweb.newsbank.com/resources/doc/nb/news/11C8FE9E53B05438?p=AWNB	But he said blanket use of alternative antibiotics would foster the development of germs resistant to those drugs as well, leaving doctors with fewer remaining weapons against MRSA.
328	Falling behind: Medical research funding drops as deadly mutations are increasingly able to beat antibiotics	http://infoweb.newsbank.com/resources/doc/nb/news/11E4EAEFFAC0F078?p=AWNB	in his view, when bacteria develop resistance to modern antibiotics, they are merely rolling out old tricks they mastered eons ago in their struggle to live in harsh environments in competition with similarly resilient species.
329	Beating bad bugs: Economics and evolution frustrate effort to eliminate a growing threat	http://infoweb.newsbank.com/resources/doc/nb/news/11E767C32E9AE498?p=AWNB	A new antibiotic, methicillin, came out in 1960, but within a year some staph germs had developed a defense against that drug, too.
330	Beating bad bugs: Economics and evolution frustrate effort to eliminate a growing threat	http://infoweb.newsbank.com/resources/doc/nb/news/11E767C32E9AE498?p=AWNB	Alarmed by the need to keep ahead of rapidly mutating bacterial strains, researchers since then have developed four successive generations of cephalosporins - the first came out in 1964.
331	BACTERIA BECOMING UNBEATABLE// RESISTANCE TO ANTIBIOTICS EVOLVING IN MANY STRAINS	http://infoweb.newsbank.com/resources/doc/nb/news/0EB5DD9ECFAFA793?p=AWNB	But certain uncommon bacteria already have developed untreatable strai
332	MORE GERMS GAIN RESISTANCE TO DRUGS	http://infoweb.newsbank.com/resources/doc/nb/news/0EB5DE4A134706C1?p=AWNB	About 85 percent of the types of bacteria responsible for hospital-acquired infections gradually have developed resistance to common antibiotics, said Dr. Martin Favero of the Centers for Disease Control and Prevention in Atlanta.
333	DOCTORS LAUNCH CAMPAIGN TO REDUCE ANTIBIOTIC USE	http://infoweb.newsbank.com/resources/doc/nb/news/0EB5E3AAD04AFE2A?p=AWNB	The study also will examine whether the public campaign slows the development of tougher bacteria strains that gradually become resistant to antibiotics.
334	For sinus infection, antibiotics aren't better than waiting it out, study says	http://infoweb.newsbank.com/resources/doc/nb/news/13CF8463F4AC8328?p=AWNB	Over-use of antibiotics is considered an important and growing public-health problem, as disease-causing bacteria continue to develop resistance to the drugs we rely on to kill them.
335	New antibiotic hailed as breakthrough	http://infoweb.newsbank.com/resources/doc/nb/news/10546B938BB452B1?p=AWNB	A study in the medical journal The Lancet last July reported that a strain of staph bacteria had already developed a resistance to linezolid in the US.
336	Rise of the superbug rekindles interest in natural-born killers - Mind & Body	http://infoweb.newsbank.com/resources/doc/nb/news/10546E9833C27BC0?p=AWNB	So now many bacteria - the so-called "superbugs" - have developed a resistance to antibiotics.
337	New killer bug could beat antibiotics	http://infoweb.newsbank.com/resources/doc/nb/news/136D18BE2C4C1298?p=AWNB	It has been caused by the widespread use and misuse of antimicrobial medicines and develops when a micro-organism mutates or acquires a resistance gene.
338	Wonder drug in frogs - HEALTH	http://infoweb.newsbank.com/resources/doc/nb/news/13D8DB9F5A79FFF8?p=AWNB	This made it hard for bacteria to develop resistance to them, she said.
339	Silver lining removed in medicine's war with bacteria	http://infoweb.newsbank.com/resources/doc/nb/news/14661CCD14CCA560?p=AWNB	To confirm this adaptive response, the team pre-exposed a laboratory strain of Bacillus subtilis to varying levels of nano-silver over 14 days. The bacteria developed resistance.
340	Keep our food safe: diseases expert calls for ban on some antibiotics for animals	http://infoweb.newsbank.com/resources/doc/nb/news/14736EAC233DAEC8?p=AWNB	"This means if resistance develops in bacteria to them, then there are no or few alternatives to treat serious infection," he said.
341	Critical time to fight infectious disease	http://infoweb.newsbank.com/resources/doc/nb/news/14B1AFF55D85B188?p=AWNB	Instead of laboriously developing a drug for a single new target present on resistant bacteria, these new antimicrobials will inactivate genes that control hundreds of targets, for the first time getting us in front of the bacteria's capacity to rapidly develop resistance to existing drugs.
342	OVERDOSING ON ANTIBIOTICS	http://infoweb.newsbank.com/resources/doc/nb/news/0FC9A8D141E57777?p=AWNB	culture of antibiotic use has developed, initiated by the gay abandon with which doctors prescribed the wonder drugs in the 1950s and 60s when there seemed to be a never-ending supply of new and better antibiotics.
343	GERM warfare	http://infoweb.newsbank.com/resources/doc/nb/news/10D650298BF5E7A8?p=AWNB	``We're not going to eliminate them, and we never will -- the best we can hope to do is to slow the rate of development of resistance,'' Tapsall says. He says a superbug containment drive that focuses largely on hospitals is ``doomed to failure''.
344	Drug-resistant gonorrhea on rise, MDs told	http://www.lexisnexis.com/lnacui2api/api/version1/getDocCui?lni=4M9B-TXH0-TW7J-350G&csi=303830&hl=t&hv=t&hnsd=f&hns=t&hgn=t&oc=00240&perma=true	The strains have also developed resistance to tetracycline, leading doctors to use the more costly spectinomycin antibiotic.
345	COVER STORY How bugs outwit drugs Bacteria's new tactic: They swap genes to thwart antibiotics	http://www.lexisnexis.com/lnacui2api/api/version1/getDocCui?lni=4M94-97H0-TW7J-32CN&csi=303830&hl=t&hv=t&hnsd=f&hns=t&hgn=t&oc=00240&perma=true	It was inevitable that bacteria would develop resistance.
346	MIDDLE KINGDOM RESEARCH Dental fillings may take the bite out of antibiotics	http://www.lexisnexis.com/lnacui2api/api/version1/getDocCui?lni=4M93-NXX0-TW7J-32TX&csi=303830&hl=t&hv=t&hnsd=f&hns=t&hgn=t&oc=00240&perma=true	The cause of the development of resistance is something of a mystery but microbiologists have now come up with a surprising new suspect: dental fillings.
347	Mind & Matter Antibiotic arsenal is rapidly being depleted	http://www.lexisnexis.com/lnacui2api/api/version1/getDocCui?lni=4M91-3M00-TW7J-32KW&csi=303830&hl=t&hv=t&hnsd=f&hns=t&hgn=t&oc=00240&perma=true	"It took two decades for staph to develop resistance to methicillin across North America, but it only took enterococci (a ubiquitious intestinal bacteria), two years to beat vancomycin in the United States.
348	U.S. germs invading Canadian hospitals Antibiotics powerless against bacteria	http://www.lexisnexis.com/lnacui2api/api/version1/getDocCui?lni=4M8X-8B80-TW7J-32PF&csi=303830&hl=t&hv=t&hnsd=f&hns=t&hgn=t&oc=00240&perma=true	About 160 antibiotic drugs have been added to the arsenal since penicillin, but bacteria have been developing resistance to them as well.
349	Antibiotic arsenal exhausted Scientists suggest a crisis is on its way in the long-running battle with bacteria that will see some common diseases untreatable in the next few years.	http://www.lexisnexis.com/lnacui2api/api/version1/getDocCui?lni=4M8X-K3C0-TW7J-323P&csi=303830&hl=t&hv=t&hnsd=f&hns=t&hgn=t&oc=00240&perma=true	For half a century, scientists stayed one step ahead of bacteria by developing a new antibiotic every time the bugs developed a resistance to the old ones.
350	Infection experts alarmed by drug-resistant bacteria Hospitals fear deadly complications in some cases	http://www.lexisnexis.com/lnacui2api/api/version1/getDocCui?lni=4M8W-XYR0-TW7J-33CG&csi=303830&hl=t&hv=t&hnsd=f&hns=t&hgn=t&oc=00240&perma=true	Drug companies have few new antibiotics in development because drug resistance has developed so quickly.
351	Warning given on animal-feed antibiotics	http://www.lexisnexis.com/lnacui2api/api/version1/getDocCui?lni=4M8W-Y3M0-TW7J-3248&csi=303830&hl=t&hv=t&hnsd=f&hns=t&hgn=t&oc=00240&perma=true	Antibiotics used in animal feed are contributing to the development of drug-resistant bacteria that pose a threat to human health, a top federal scientist says.
352	Team maps how 'bugs' defeat antibiotics McMaster scientists identify enzyme	http://www.lexisnexis.com/lnacui2api/api/version1/getDocCui?lni=4M8W-Y2P0-TW7J-33F1&csi=303830&hl=t&hv=t&hnsd=f&hns=t&hgn=t&oc=00240&perma=true	Once resistance develops, it is passed on to future generations of bacteria.
353	BODY WORKS HEALTH AND FITNESS When you shouldn't take antibiotics	http://www.lexisnexis.com/lnacui2api/api/version1/getDocCui?lni=4M8X-5TF0-TW7J-32X2&csi=303830&hl=t&hv=t&hnsd=f&hns=t&hgn=t&oc=00240&perma=true	Killing off only the weakest bacteria leaves more opportunity for strong bacteria to survive and increases the risk that a drug-resistant strain will develop.
354	Virulent bacteria resist final drug Four cases reported in which antibiotic had no effect on sometimes fatal bug	http://www.lexisnexis.com/lnacui2api/api/version1/getDocCui?lni=4M8C-DS70-TW7J-324C&csi=303830&hl=t&hv=t&hnsd=f&hns=t&hgn=t&oc=00240&perma=true	A strain of bacteria responsible for sometimes fatal infections in hospitals is developing a resistance to the last antibiotic used to kill them completely, according to a report in the New England Journal of Medicine.
355	Virulent bacteria resist final drug Four cases reported in which antibiotic had no effect on sometimes fatal bug	http://www.lexisnexis.com/lnacui2api/api/version1/getDocCui?lni=4M8C-DS70-TW7J-324C&csi=303830&hl=t&hv=t&hnsd=f&hns=t&hgn=t&oc=00240&perma=true	Tests suggest that similar staph bacteria, already found in hospitals in the New York metropolitan area, have accumulated the raw material needed to develop a full-blown resistance to the antibiotic. One small mutation may be enough to complete the process
356	Virulent bacteria resist final drug Four cases reported in which antibiotic had no effect on sometimes fatal bug	http://www.lexisnexis.com/lnacui2api/api/version1/getDocCui?lni=4M8C-DS70-TW7J-324C&csi=303830&hl=t&hv=t&hnsd=f&hns=t&hgn=t&oc=00240&perma=true	In the three previous cases where a vancomycin-resistant strain had arisen, the specific bacteria infecting each patient had not developed a complete immunity to all antibiotics.
357	Vigilance required to ensure tuberculosis recovery Potential growth of drug-resistant strains means some patients must be monitored to see that medication is taken	http://www.lexisnexis.com/lnacui2api/api/version1/getDocCui?lni=4M8N-WNK0-TW7J-3259&csi=303830&hl=t&hv=t&hnsd=f&hns=t&hgn=t&oc=00240&perma=true	Otherwise, the disease can develop a resistance to one of the front-line antibiotics used to combat it: Isoniazid (INH) or Rifampin.
358	Canada 2005?; The sanatoriums are long gone, but tuberculosis is not. It; remains, public health reporter ANDRÉ PICARD warns, one of the; world's great killers. Drug-resistant TB costs a fortune to fight; and even wealthy nations aren't immune to a serious outbreak. 'It; could happen in Toronto, if we're not careful,' one expert says	http://www.lexisnexis.com/lnacui2api/api/version1/getDocCui?lni=4KY9-W580-TXJ2-N24F&csi=303830&hl=t&hv=t&hnsd=f&hns=t&hgn=t&oc=00240&perma=true	These new strains develop when drugs are misused, usually when patients begin their TB treatment but don't complete it, allowing the bacteria to mutate.
359	Superbug MRSA cases hit record level in Ontario	http://www.lexisnexis.com/lnacui2api/api/version1/getDocCui?lni=4TVH-HGX0-TXJ2-N14P&csi=303830&hl=t&hv=t&hnsd=f&hns=t&hgn=t&oc=00240&perma=true	Also worrisome were figures released on vancomycin-resistant enterocci (VRE), a strain of bacteria that has developed resistance to many commonly used antibiotics, specifically vancomycin.
360	Watch your 'resistance footprint,' experts urge	http://www.lexisnexis.com/lnacui2api/api/version1/getDocCui?lni=7V1Y-6WT1-2RKY-7396&csi=303830&hl=t&hv=t&hnsd=f&hns=t&hgn=t&oc=00240&perma=true	They think that urging people to consider their "resistance footprint" may help patients and prescribing doctors get their heads around the notion that every time anyone uses antibiotics unnecessarily or inappropriately, it helps drive the development of resistant bacteria.
361	Gonorrhea superbug may soon be global threat	http://www.lexisnexis.com/lnacui2api/api/version1/getDocCui?lni=55TW-5GG1-F06S-31JP&csi=303830&hl=t&hv=t&hnsd=f&hns=t&hgn=t&oc=00240&perma=true	Experts say the best way to reduce the risk of gonorrhea developing even greater resistance - beyond the urgent need to develop effective new drugs - is to treat it with combinations of two or more types of antibiotics at the same time.
362	The new germ warfare; As many as 22 Canadians die every day from hospital-acquired infections. Carly Weeks reports from the front lines of a fight we cannot lose	http://www.lexisnexis.com/lnacui2api/api/version1/getDocCui?lni=5BDN-R401-JCRP-C2R7&csi=303830&hl=t&hv=t&hnsd=f&hns=t&hgn=t&oc=00240&perma=true	Superbugs are created when a bacterium develops resistance to the antibiotic designed to kill it.
363	The Guardian: Antibiotics: agents lose their cutting edge: INSIDE THE NEWS: Most bacteria that live in us and on us are either harmless or actually essential for life. But they mutate all the time, and those that	http://infoweb.newsbank.com/resources/doc/nb/news/0F27DF6823D49732?p=AWNB	Bacteria can divide every 20 minutes in the right conditions, and their ability to generate genetic variation means that they will continue to develop strains that are resistant.
364	The Guardian: Alarm as superbug hits British hospital	http://infoweb.newsbank.com/resources/doc/nb/news/0F2747FE212A2E0C?p=AWNB	It is still possible to treat Visa with high doses of the antibiotic, but it is only a matter of time before the bug develops complete resistance.
365	The Guardian: Alarm as superbug hits British hospital	http://infoweb.newsbank.com/resources/doc/nb/news/0F2747FE212A2E0C?p=AWNB	There are serious concerns that another family of bacteria, which has already developed a mutant form completely resistant to vancomycin (although not to other antibiotics), could pass its genes for resistance to the staphylococcus aureus bacterium in a hospital setting.
366	The Guardian: Science: Zapping superbugs: David Bradley on medicine's latest weapons against bacteria	http://infoweb.newsbank.com/resources/doc/nb/news/0F2B377873AB8A2C?p=AWNB	As aminoglycosides are highly toxic, they are not normally given in pill form, but bugs are already developing resistance to those we do use.
367	Wonderdrug' losing war with superbugs	http://infoweb.newsbank.com/resources/doc/nb/news/0F2ADA97D2EAB57F?p=AWNB	It was initially effective in all five patients, but over a period of weeks tests showed that the bacteria were beginning to develop a resistance to the drug
368	The Guardian: Woman is first patient to die from rare superbug	http://infoweb.newsbank.com/resources/doc/nb/news/0F81D9F7C0827B78?p=AWNB	However the MRSA persisted and developed resistance to the vancomycin, thus developing another superbug, known as a Gisa, glycopeptide-intermediate staphylococcus aureus.
369	The Guardian: Superbugs spread to GP surgeries	http://infoweb.newsbank.com/resources/doc/nb/news/0FCDF8166E1BDE83?p=AWNB	In parts of the West Midlands and in north Surrey, common bacterial infections appear to have developed such resistance to drugs that a "significant shift" might be happening in patient care.
370	The Guardian: G2: Health: Worried about MRSA?: You should be. More of us are catching it, more of us are dying from it, and now it seems children are the new victims. James Meikle on the march of a killer bug	http://infoweb.newsbank.com/resources/doc/nb/news/1018AF1DC0B8DEBB?p=AWNB	It started developing resistance to penicillin almost as soon as that wonder drug heralded a brave new post-second world war world of antibiotics.
371	The Guardian: Science: New class of antibiotic could be effective against superbugs	http://infoweb.newsbank.com/resources/doc/nb/news/111B660743834EA8?p=AWNB	As the use of antibiotics has risen in the past few decades, so has the number of pathogenic bacteria that have developed resistance to them
372	The Guardian: Doctors running out of antibiotics to fight some infections, say experts: Don't quit less profitable research, drug firms urged Remedies critical for public health, says agency	http://infoweb.newsbank.com/resources/doc/nb/news/12322D26C5AA2648?p=AWNB	"Fifty years ago, resistance that developed in India stayed in India," he said. "Now it can be here that week."
373	The Guardian: G2: →: ←: 'We have a window of maybe 10 years': Antibiotics are a bedrock of modern medicine. But in the very near future, we're going to have to learn to live without them once again. And it's going to get nasty. By Sarah Boseley	http://infoweb.newsbank.com/resources/doc/nb/news/1318E38042261838?p=AWNB	says Walsh, who has been urging co-ordinated efforts across the world to put in place good surveillance systems to find out what resistance is developing and where, and then look for interventions.
374	The Guardian: Comment: The reason why this deadly E coli makes doctors shudder: It is past time for health authorities to curb the antibiotic misuse that created the resistance of this aberrant strain	http://infoweb.newsbank.com/resources/doc/nb/news/137B1B8AC798AFD8?p=AWNB	The development of resistance is an inevitable biological process; it's what bacteria do to protect themselves against deadly compounds.
375	Call for new generation of antibiotics to fight off superbugs - Chief medical officer welcomes prime minister's demand for global action to combat problem	http://infoweb.newsbank.com/resources/doc/nb/news/14ED54AE71D3D430?p=AWNB	Cameron, who this month called for immediate action to accelerate the development of drugs for dementia, is said to have raised the problem of antibiotic-resistant superbugs during last year's G7 summit.
376	Docs! Be as wise as microbes	http://infoweb.newsbank.com/resources/doc/nb/news/1157B9F98CEFFB30?p=AWNB	New antibiotics are barely able to keep pace with developing drug resistance.
377	Docs! Be as wise as microbes	http://infoweb.newsbank.com/resources/doc/nb/news/1157B9F98CEFFB30?p=AWNB	On the other hand, as soon as an antibiotic is introduced for treatment in hospital setup, due to selective pressure the bug develops resistance by single or few mutations in their genes and the therapy becomes ineffective," said Dr Mahapatra.
378	Super drugs turn super killers, claim more lives than terror	http://infoweb.newsbank.com/resources/doc/nb/news/145214E68A384D70?p=AWNB	It is becoming increasingly difficult to develop new drugs active against resistant strains.
379	KILLING BACTERIA WITH WATER AND FRESH AIR	http://infoweb.newsbank.com/resources/doc/nb/news/14C716080C0485D8?p=AWNB	And antibiotics are not being developed fast enough to keep pace with superbugs' ability to develop resistance to them.
380	Deadly NDM-1 'superbug' raises fears of antibiotic resistance in city hospitals	http://infoweb.newsbank.com/resources/doc/nb/news/150F8D9787784AE0?p=AWNB	Hospitals may soon find it very difficult to treat patients with serious infections as a "superbug," a bacteria that develops resistance to multiple antibiotics, has somehow found its way into the city.
381	Doc urges judicious use of anti-biotics, fast getting drug resistant	http://infoweb.newsbank.com/resources/doc/nb/news/156462275A83B070?p=AWNB	He said, "ESBL is a sort of enzyme that is secreted by the bacteria after it develops resistance towards some specific antibiotics and therefore that antibiotic does not have any curing effect on the patient.
382	PU microbiology profs work at bettering antibiotics	http://infoweb.newsbank.com/resources/doc/nb/news/1564624F7A4A60E8?p=AWNB	Moreover, it was observed that antibiotic resistance was developing rampantly in pathogenic bacteria.
383	Self-prescription, overuse of drugs increases resistance risk	http://infoweb.newsbank.com/resources/doc/nb/news/15646972B87C20F8?p=AWNB	It is generally observed that a larger duration of exposure to an antibiotic increases the risk of development of resistance
384	Taiwan puts hospitals on alert against NDM1 superbug	http://infoweb.newsbank.com/resources/doc/nb/news/15646938EEB49E88?p=AWNB	The development of resistance to medicines used to treat malaria, tuberculosis and HIV infection is of particular concern
385	Poultry goods can harm your system	http://infoweb.newsbank.com/resources/doc/nb/news/156469F3216B2148?p=AWNB	The pre-scheduled dose proves ineffective for bacteria and microbes that have already developed resistance in your system.
386	Concern at misuse of antibiotics	http://infoweb.newsbank.com/resources/doc/nb/news/1564AED777995A48?p=AWNB	"About 80% patients in rural areas are dependent on quacks ," said Ajay Kumar, secretary, Bihar State Health Services Association, at the seminar, adding, "indiscriminate and inadequate use of antibiotics by them is a major concern, and probably this is the major cause of developing antimicrobial resistance in the state."
387	Caution against pills popping	http://infoweb.newsbank.com/resources/doc/nb/news/1564AEEA5A51E658?p=AWNB	Over dose of antibiotics are likely to develop the super-bugs in the body, he said, adding that there was need to create awareness on the dangers of use of antibiotics without prescriptions."Health activists and ASHA workers, who deal with rural people, should play vital roles in this regard," he said.
388	Antibiotics overuse spurring TB, pneumonia'	http://infoweb.newsbank.com/resources/doc/nb/news/1566F93649A7E4B0?p=AWNB	"There is a 50% chance that these people will develop resistance to quinolones. This is alarming as quinolones are used for treatment of TB in India. This rampant misuse is leading to Multi-Drug Resistant (MDR) TB which is a cause of great concern," Dr Mishra said.
389	Experts: Self-medication makes antibiotics lose bite	http://infoweb.newsbank.com/resources/doc/nb/news/156553BF430A59D0?p=AWNB	More than half of patients taking to self-medication end up developing drug resistance.
390	University to probe effect of antibiotics	http://infoweb.newsbank.com/resources/doc/nb/news/10BC8CEF9E1BF648?p=AWNB	And the bacteria that cause children's ear infections are developing a resistance to antibiotics, he says.
391	Scientists are looking for new ways to outsmart drug-resistant bacteria that have become a ... Deadly force	http://infoweb.newsbank.com/resources/doc/nb/news/10BC3192D1826C00?p=AWNB	Synphar's president, Dr. Ronald Micetich, says some bacteria become drug-resistant by developing a new enzyme that blocks the antibiotic.
392	A looming antibiotic 'apocalypse' It's possible to return to the death rates common before the use of penicillin	http://infoweb.newsbank.com/resources/doc/nb/news/10BC81EB88F76518?p=AWNB	So far, doctors in Canada are managing to cope since they have a wide variety of drugs at their disposal. They can try one or another until they find a mix for which the microbe they're targeting hasn't yet developed a resistance.
393	Acne starts resisting antibiotics	http://infoweb.newsbank.com/resources/doc/nb/news/10BBF4C149E003E0?p=AWNB	Several recent studies show that some acne-causing bacteria have developed strains that resist both topical and oral antibiotics.
394	No quick victory in this war	http://infoweb.newsbank.com/resources/doc/nb/news/10BA8424AB02A2A8?p=AWNB	Sometimes it only takes a few weeks for some bacteria to develop resistance to a new antibiotic.
395	U.S. approves drug against 'super' bacteria	http://infoweb.newsbank.com/resources/doc/nb/news/10BB97CA3A142618?p=AWNB	Synercid comes at a critical time, as more germs develop resistance to that "silver bullet" antibiotic, vancomycin, leaving doctors helpless as patients die from once-treatable infections
396	Superbug costs $50 million a year, study finds	http://infoweb.newsbank.com/resources/doc/nb/news/10B7FA997245EB38?p=AWNB	The antibiotic used to treat staph is usually methicillin, but, since some bacteria has developed a resistance, doctors are sometimes forced to a second line of treatment, the intravenous antibiotic vancomycin.
397	E. coli probed in five seniors' deaths	http://infoweb.newsbank.com/resources/doc/nb/news/10B83A4AB1E748A8?p=AWNB	This "new" strain is a variation of a common bacterium found in the digestive tract that has developed a resistance to antibiotics, Reynolds said.
398	Superbug resists toughest antibiotic	http://infoweb.newsbank.com/resources/doc/nb/news/10B93F4519190898?p=AWNB	Experts and organizations such as the Centers for Disease Control have been on the lookout for the development of a strain of staph aureus that is resistant to vancomycin.
399	Superbugs and nightmare scenarios - Resistance to antibiotics grows	http://infoweb.newsbank.com/resources/doc/nb/news/10B9408A26125A68?p=AWNB	Scientists are using gene-sequencing technology to understand the varying processes by which microbes develop resistance and transmit it, even to other bacterial species.
400	Staph bug grows drug resistant	http://infoweb.newsbank.com/resources/doc/nb/news/10C7C3D6838317F8?p=AWNB	U.S. health officials warned yesterday that a common microbe found on the skin or nasal passages of one-third of Americans had developed resistance to the antibiotic usually prescribed to kill it.
401	Hold the pickles, and the antibiotics	http://infoweb.newsbank.com/resources/doc/nb/news/10C7C867EE314D58?p=AWNB	When humans eat animals that have been regularly fed antibiotics, bacteria in the humans tend over time to develop immunity to the antibiotics.
402	Goodbye, antibiotics - Antibiotic resistance appears to be so unstoppable that we need to develop new ways to fight and prevent infections	http://infoweb.newsbank.com/resources/doc/nb/news/138955FB376DF4E8?p=AWNB	Instead, resistance was a natural phenomenon in which bacteria developed tolerance to non-lethal concentrations of the antibiotic,
403	Gonorrhea makes dangerous comeback	http://infoweb.newsbank.com/resources/doc/nb/news/13F43486780B6D68?p=AWNB	"This organism has basically been developing resistance against every medication we've thrown at it," said Dr. Manjula Lusti-Narasimhan, a scientist in the agency's department of sexually transmitted diseases.
404	U.S. warns of germ that resists drugs	http://infoweb.newsbank.com/resources/doc/nb/news/0EB77311587CCEF5?p=AWNB	A deadly microbe that has developed resistance to the last of the antibiotics readily capable of killing it has turned up in a Michigan man, health officials warned Thursday.
405	Patients found to be infected by bacteria resistant to strongest antibiotics	http://infoweb.newsbank.com/resources/doc/nb/news/127E2BA25AE18BC8?p=AWNB	The CDC believes that the resistance developed within the patients' bodies and was not introduced from outside.
406	Health departments cannot track drug-resistant disease, report says	http://infoweb.newsbank.com/resources/doc/nb/news/127D8701548B8580?p=AWNB	Doctors are most worried about a virulent bacteria that is developing resistance to even the strongest of antibiotics; five cases of Staphylococcus aureus partially resistant to vancomycin have been found in severely ill patients, three in the United States, one in Japan and the most recent in Hong Kong.
407	Garden shrub may help snip out hospital infections	http://infoweb.newsbank.com/resources/doc/nb/news/0EB773EB15628D50?p=AWNB	Staph aureus is a common bacterium in hospitals and has developed resistance to antibiotics in recent years, causing infections that are difficult and expensive to treat.
408	Drug-resistant diseases becoming worldwide public health issue	http://infoweb.newsbank.com/resources/doc/nb/news/127D6E06CB51E748?p=AWNB	"Our extensive use of antimicrobial drugs as well as the remarkable ability of microbes to mutate and develop resistance threatens to return us to the situation we had in the early 1900s where common infections were often lethal," Cochran said.
409	Drug-resistant diseases becoming worldwide public health issue	http://infoweb.newsbank.com/resources/doc/nb/news/127D6E06CB51E748?p=AWNB	These organisms develop and grow stronger if medications are used when they are not needed, such as in the United States, or only partially used, such as with antibiotics in poorer nations.
410	New, growing threat: Resistance to Cipro antibiotic	http://infoweb.newsbank.com/resources/doc/nb/news/0EF5CC1150859A0C?p=AWNB	But with use of drugs, especially in cases where patients fail to take them long enough to fully eliminate the infection, bacteria develop resistance to antibiotics.
411	FDA vs. antibiotics for animal growth	http://infoweb.newsbank.com/resources/doc/nb/news/130A9840506AD9B0?p=AWNB	"Because bacteria are so good at becoming resistant to antimicrobial drugs, it is essential that such drugs be used judiciously to delay the development of resistance," says Joshua Sharfstein, the FDA's principal deputy commissioner of food and drugs.
412	CDC sounds alarm on deadly, untreatable superbugs	http://infoweb.newsbank.com/resources/doc/nb/news/144E40EDEFCCA220?p=AWNB	"Excessive antibiotic use combined with failure of health care workers to wash hands before and after caring for patients allows these bugs to develop and spread."
413	Germ Fighter in Household Products Is Found to Generate Resistant Strains	http://search.proquest.com/wallstreetjournal/docview/398628036/fulltext/B9783CC047B4413CPQ/70?accountid=14512	"Clinical studies with Total conducted over a prolonged period under real world conditions demonstrated that oral bacteria did not develop resistance to triclosan," said spokesman Bob Murray.
414	As Bacteria Outsmart Old Antibiotics, Drug Makers Ready New Arsenal	http://search.proquest.com/wallstreetjournal/docview/398729960/fulltext/B9783CC047B4413CPQ/87?accountid=14513	Since the early 1990s, tens of thousands of patients -- many of whom are among a hospital's most severely ill or are recovering from surgery -- have been infected by mutant forms of life-threatening bacterial germs that have developed an ability to evade all existing drugs.
415	As Bacteria Outsmart Old Antibiotics, Drug Makers Ready New Arsenal	http://search.proquest.com/wallstreetjournal/docview/398729960/fulltext/B9783CC047B4413CPQ/87?accountid=14515	SAN FRANCISCO -- The drug industry is making gains in the race to develop "super-antibiotics," a new wave of weapons against the rising tide of medicine-resistant bugs.
416	Overprescribing Warning May Appear on Antibiotics	http://search.proquest.com/wallstreetjournal/docview/398869849/fulltext/B9783CC047B4413CPQ/103?accountid=14512	The more the bacteria are exposed to the drugs, the more likely they will develop resistance and make diseases more difficult -- if not impossible -- to treat.
417	The Informed Patient: Healthy People Are At Growing Risk From Staph Infections	http://search.proquest.com/wallstreetjournal/docview/398973812/C1B578A4F8964D83PQ/159?accountid=14513	It's likely to get worse: Antibiotic resistance is developing quickly, while investment by pharmaceutical companies in more powerful drugs to counter infections is on the decline.
418	Silent Epidemic: Defying Treatment, A New, Virulent Bug Sparks Health Fears; Drug-Resistant Staph Kills Quickly and Randomly; Antibiotics' Worrying Toll; Simon Sparrow Wakes Crying	http://search.proquest.com/wallstreetjournal/docview/398990307/C1B578A4F8964D83PQ/200?accountid=14513	Its officials say the rapidly developing disease couldn't have been detected any sooner.
419	The Informed Patient: 'Superbugs' That Strike the Sickest Patients	http://search.proquest.com/wallstreetjournal/docview/399095897/F38102464A914E41PQ/235?accountid=14512	Some also produce an enzyme, known as ESBL, that enables them to break down antibiotics and develop even more resistance.
420	Don't Forget the Bacterial Threat	http://search.proquest.com/wallstreetjournal/docview/399084931/E9F594EAD4EA4960PQ/245?accountid=14512	Unfortunately, the era of easily treated infections is proving to be short-lived, as bacteria develop increasingly sophisticated mechanisms of resistance to antibiotics.
421	Antibiotics losing war vs. germs in children	http://infoweb.newsbank.com/resources/doc/nb/news/0EB4237FF74C1BB8?p=AWNB	Researchers say overprescribing antibiotics is in part to blame for the emergence of drug-resistant germs
422	FEARING DRUG RESISTANCE	http://infoweb.newsbank.com/resources/doc/nb/news/0F80844AB3765A20?p=AWNB	The emergence of bacteria strains that cannot be killed by the current arsenal of antibiotics could become a public health threat worse than AIDS, experts warn.
423	PENICILLIN FAILING IN WAR ON MICROBES	http://infoweb.newsbank.com/resources/doc/nb/news/0F80851B7220BDCC?p=AWNB	Over the last decade, medical scientists have grown increasingly concerned about the emergence of antibiotic resistance as seemingly vanquished microbes have bounced back
424	Resistance growing to last gonorrhea treatment option	http://infoweb.newsbank.com/resources/doc/nb/news/140D36C5188F8960?p=AWNB	This is a clear warning sign that the emergence of cefixime resistance is on the horizon
[truncated: 459 more rows]
